# Supplementary material
Source: PubMed Central journal article supplement (PMC3139748)
Supplement: NIHMS266448-supplement-2_si_002.pdf [file NIHMS266448-supplement-2_si_002.pdf]

Supporting Information

**A Dinuclear Palladium Catalyst for  $\alpha$ -Hydroxylation of Carbonyls  
with O<sub>2</sub>**

Gary Jing Chuang, Weike Wang, Eunsung Lee, and Tobias Ritter \*

Department of Chemistry and Chemical Biology, Harvard University

Cambridge, Massachusetts 02138

E-mail: [ritter@chemistry.harvard.edu](mailto:ritter@chemistry.harvard.edu)

## Table of Contents

|                                                                                                                                                          |            |
|----------------------------------------------------------------------------------------------------------------------------------------------------------|------------|
| Materials and Methods .....                                                                                                                              | 4          |
| Experimental Data .....                                                                                                                                  | 4          |
| Effect of temperature on reaction .....                                                                                                                  | 4          |
| Table S1. Evaluation of reaction temperature .....                                                                                                       | 4          |
| Effect of solvent on the reaction.....                                                                                                                   | 5          |
| Table S2. Evaluation of solvent in the reaction .....                                                                                                    | 5          |
| Table S3. Hydroxylation in THF, benzene, and toluene .....                                                                                               | 6          |
| Oxidant O <sub>2</sub> versus air in the reaction.....                                                                                                   | 6          |
| Scheme S1. Result of using O <sub>2</sub> versus air in the reaction.....                                                                                | 7          |
| Determination of peroxide content in THF .....                                                                                                           | 7          |
| Comparison of Pd/C to Pd <sub>2</sub> hpp <sub>4</sub> -catalyzed $\alpha$ -hydroxylation .....                                                          | 7          |
| Scheme S2. $\alpha$ -Homo-coupling and $\alpha$ -hydroxylation of 2-phenyl-1,3-indandione .....                                                          | 8          |
| Detection of hydroperoxide in Pd <sub>2</sub> hpp <sub>4</sub> -catalyzed $\alpha$ -hydroxylation .....                                                  | 8          |
| Scheme S3. Hydroperoxylation and hydroxylation of phenylbutazone .....                                                                                   | 8          |
| Experimental Procedures and Compound Characterization .....                                                                                              | 9          |
| Pd <sub>2</sub> hpp <sub>4</sub> ( <b>1</b> ).....                                                                                                       | 9          |
| <i>tert</i> -Butyl 3-(2-methyl-3-oxobutanoyl)-1 <i>H</i> -indole-1-carboxylate ( <b>S1</b> ).....                                                        | 9          |
| 5-((3 <i>aR</i> ,6 <i>S</i> ,6 <i>aS</i> )-Hexahydro-2-oxo-1 <i>H</i> -thieno[3,4- <i>d</i> ]imidazol-6-yl)pentyl<br>diphenylacetate ( <b>S2</b> ) ..... | 2,2-<br>10 |
| 3,4-dihydro-2-(pent-4-enyl)naphthalen-1(2 <i>H</i> )-one ( <b>S10</b> ) .....                                                                            | 10         |
| 3,4-Dihydro-1-hydroxy-1-methylnaphthalen-2(1 <i>H</i> )-one ( <b>4</b> ).....                                                                            | 11         |
| 2-Acetyl-3,4-dihydro-2-hydroxynaphthalen-1(2 <i>H</i> )-one ( <b>5</b> ) .....                                                                           | 12         |
| Ethyl 2-cyclopropyl-2-hydroxy-3-oxobutanoate ( <b>6</b> ) .....                                                                                          | 12         |
| Methyl 1-hydroxy-4-methoxy-2-oxocyclopent-3-enecarboxylate ( <b>7</b> ).....                                                                             | 12         |
| Ethyl 1-hydroxy-2-methyl-4-oxocyclohex-2-enecarboxylate ( <b>8</b> ).....                                                                                | 13         |
| 2,3-Dihydro-2-hydroxy-2-methylinden-1-one ( <b>9</b> ).....                                                                                              | 13         |
| 3,4-Dihydro-2-hydroxy-2-methylnaphthalen-1(2 <i>H</i> )-one ( <b>10</b> ).....                                                                           | 14         |
| Diethyl 2-hydroxy-2-phenylmalonate ( <b>11</b> ) .....                                                                                                   | 14         |
| 2-Hydroxy-2-phenylcyclohexanone ( <b>12</b> ) .....                                                                                                      | 15         |
| 2-Hydroxy-1,2-diphenylpropan-1-one ( <b>13</b> ).....                                                                                                    | 15         |
| 1-Acetyl-3-hydroxy-3-methylindolin-2-one ( <b>14</b> ).....                                                                                              | 16         |

|                                                                                                                                                                    |    |
|--------------------------------------------------------------------------------------------------------------------------------------------------------------------|----|
| 6-Hydroxy-4,4,6-trimethylcyclohex-2-enone ( <b>15</b> ).....                                                                                                       | 16 |
| Methyl 2-hydroxy-2,2-diphenylacetate ( <b>16</b> ).....                                                                                                            | 17 |
| 2-Hydroxy-2-methyl-1-(pyrrolidin-1-yl)butane-1,3-dione ( <b>17</b> ).....                                                                                          | 17 |
| 2-Hydroxy-2-methyl-1-phenylpropan-1-one ( <b>18</b> ).....                                                                                                         | 17 |
| 2-Benzyl-2-hydroxycyclohexanone ( <b>19</b> ).....                                                                                                                 | 18 |
| (1-Hydroxycyclopentyl)(phenyl)methanone ( <b>20</b> ).....                                                                                                         | 18 |
| <i>tert</i> -Butyl 3-(2-hydroxy-2-methyl-3-oxobutanoyl)-1 <i>H</i> -indole-1-carboxylate ( <b>21</b> ).....                                                        | 19 |
| 3,4-dihydro-2-hydroxy-2-(pent-4-enyl)naphthalen-1(2 <i>H</i> )-one ( <b>22</b> ).....                                                                              | 19 |
| 5-((3 <i>aR</i> ,6 <i>S</i> ,6 <i>aS</i> )-Hexahydro-2-oxo-1 <i>H</i> -thieno[3,4- <i>d</i> ]imidazol-6-yl)pentyl 2-hydroxy-2,2-diphenylacetate ( <b>23</b> )..... | 20 |
| Pd <sub>2</sub> hpp <sub>4</sub> Cl <sub>2</sub> ( <b>S3</b> ).....                                                                                                | 21 |
| Pd <sub>2</sub> hpp <sub>4</sub> (OBz) <sub>2</sub> ( <b>24</b> ) (CCDC 784627).....                                                                               | 21 |
| Pd <sub>2</sub> hpp <sub>4</sub> (OCO <sup>n</sup> Pr) <sub>2</sub> ( <b>S4</b> ).....                                                                             | 22 |
| 2-Hydroxy-2-phenyl-2 <i>H</i> -indene-1,3-dione ( <b>S6</b> ).....                                                                                                 | 22 |
| 2-Hydroxy-2-phenyl-2 <i>H</i> -indene-1,3-dione ( <b>S7</b> ).....                                                                                                 | 22 |
| 4-Butyl-4-hydroxy-1,2-diphenylpyrazolidine-3,5-dione ( <b>S8</b> ).....                                                                                            | 23 |
| C–H oxidation of acidic methylene groups.....                                                                                                                      | 23 |
| Benzil ( <b>S5</b> ).....                                                                                                                                          | 23 |
| Oxygen uptake experiment.....                                                                                                                                      | 24 |
| Figure S1. Oxygen uptake measurement setup.....                                                                                                                    | 25 |
| Table S4. Result of Oxygen uptake experiments.....                                                                                                                 | 25 |
| <sup>18</sup> O isotope experiment.....                                                                                                                            | 26 |
| Figure S2. Mass spectrometry measurement of <sup>18</sup> O enrichment <b>23</b> .....                                                                             | 27 |
| Experiments with mononuclear Palladium complexes.....                                                                                                              | 27 |
| UV-vis Data.....                                                                                                                                                   | 28 |
| Figure S3. UV-VIS Spectrum of Pd <sub>2</sub> hpp <sub>4</sub> Cl <sub>2</sub> ( <b>S3</b> ) in CH <sub>2</sub> Cl <sub>2</sub> at 22 °C.....                      | 28 |
| Figure S4. Molar Absorptivity Determination at 324nm.....                                                                                                          | 28 |
| Figure S5. Molar Absorptivity Determination at 648nm.....                                                                                                          | 29 |
| Figure S6. UV-VIS Spectrum comparison of 1-catalyzed α-hydroxylation of <b>3</b> ( <b>1</b> ) with dimeric Pd(III) complexes derived from <b>1</b> .....           | 29 |
| Figure S7. UV-VIS Spectrum comparison of 1-catalyzed α-hydroxylation of <b>S9</b> ( <b>S1</b> ) with <b>24</b> .....                                               | 30 |
| DFT Computations.....                                                                                                                                              | 30 |
| Table S5. The optimized structure of <b>S3</b> with B3PW91/BS I and cartesian coordinates (Å).....                                                                 | 32 |

|                                                                                                                                             |     |
|---------------------------------------------------------------------------------------------------------------------------------------------|-----|
| Table S6. Metric comparison between DFT optimized and X-ray determined structure of <b>S3</b> .<br>.....                                    | 33  |
| Table S7. Experimental and calculated absorption spectra (TD-DFT) of <b>S3</b> . .....                                                      | 33  |
| Figure S8. Simulated UV-VIS Spectrum of <b>S3</b> with TD-mPW1PW91/BS I using the<br>optimized structure of <b>S3</b> with B3PW91/BS I..... | 34  |
| Figure S9. Molecular orbitals of <b>S3</b> .....                                                                                            | 35  |
| Discussion of the result of DFT calculation .....                                                                                           | 35  |
| Electrochemical Data.....                                                                                                                   | 36  |
| Cyclic Voltammetry of <b>1</b> .....                                                                                                        | 36  |
| Electron Paramagnetic Resonance Spectrum of 1-catalyzed $\alpha$ -hydroxylation of <b>S9</b> .....                                          | 37  |
| Spectroscopic Data .....                                                                                                                    | 38  |
| X-ray Crystallographic data of Pd <sub>2</sub> hpp <sub>4</sub> (OBz) <sub>2</sub> ( <b>24</b> ) (CCDC 784627) .....                        | 99  |
| Table S8. Experimental details .....                                                                                                        | 99  |
| Table S9. Selected geometric parameters (Å, °) .....                                                                                        | 100 |
| Figure S10. X-ray structure of <b>24</b> .....                                                                                              | 112 |

## Materials and Methods

Reactions were carried out under ambient atmosphere unless otherwise specified. Anhydrous solvents were obtained either by filtration through drying columns<sup>1</sup> (ether, CH<sub>2</sub>Cl<sub>2</sub>) on an mBraun system or by distillation over sodium (ether, pentane). Purified compounds were further dried under high vacuum (0.01–0.05 Torr). Yields refer to purified and spectroscopically pure compounds. NMR spectra were recorded on a Varian Unity/Inova 500 spectrometer operating at 500 MHz and 125 MHz for <sup>1</sup>H and <sup>13</sup>C acquisitions, respectively. Chemical shifts are reported in ppm with the solvent resonance as the internal standard. The following solvent chemical shifts were used as reference values (ppm): CDCl<sub>3</sub> = 7.26 (<sup>1</sup>H), 77.0(<sup>13</sup>C); CD<sub>2</sub>Cl<sub>2</sub> = 5.32 (<sup>1</sup>H), 53.8 (<sup>13</sup>C). Data is reported as follows: s = singlet, br = broad, d = doublet, t = triplet, q = quartet, m = multiplet; coupling constants in Hz; integration. UV-VIS spectra were obtained on a Perkin Elmer Lambda 750 UV-visible spectrophotometer. High-resolution mass spectra were obtained on Jeol AX-505 or SX-102 spectrometers at the Harvard University Mass Spectrometry Facilities. Pd(OAc)<sub>2</sub> was purchased from Strem. <sup>18</sup>O<sub>2</sub> was purchased from Cambridge Isotope. Compounds **2**, **4**, **5**, **8** – **11**, and **16** were purchased from Aldrich. Compound **12** was purchased from Alfa Aesar. Compounds **18** – **20** were purchased from TCI. All chemicals were used without purification.

## Experimental Data

### Effect of temperature on reaction

General procedure: To a solution of Pd<sub>2</sub>hpp<sub>4</sub> (**1**) (8 mg, 0.01 mmol, 0.1 equiv) and hppH (**2**) (9 mg, 0.06 mmol, 0.06 equiv) in C<sub>6</sub>D<sub>6</sub> (1 mL) at chosen temperature was added 2-methyl-1-phenylpropan-1-one (15 mg, 0.10 mmol, 1.0 equiv) and the reaction mixture was stirred vigorously for 12 h at chosen temperature under 1 atm of oxygen. The conversion of isopropyl phenyl ketone to the corresponding hydroxylated product was measured by ratio of product/SM in <sup>1</sup>H NMR in C<sub>6</sub>D<sub>6</sub>. Conversion of SM to product is shown as a function of temperature in Table S1.

**Table S1. Evaluation of reaction temperature**

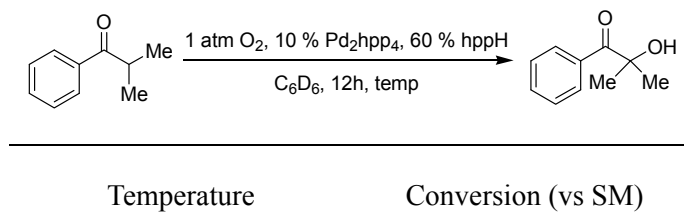

<sup>1</sup> Pangborn, A. B.; Giardello, M. A.; Grubbs, R. H.; Rosen, R. K.; Timmers, F. J. *Organometallics* 1996, 15, 1518

|        |      |
|--------|------|
| 50 °C  | 0 %  |
| 23 °C  | 60 % |
| 6 °C   | 80 % |
| -78 °C | 0 %  |

### Effect of solvent on the reaction

General procedure: To a solution of **1** (8 mg, 0.01 mmol, 0.1 equiv) and **2** (9 mg, 0.06 mmol, 0.6 equiv) in chosen solvent (1 mL) at 6 °C was added 2-methyl-1-phenylpropan-1-one (15 mg, 0.10 mmol, 1.0 equiv) and the reaction mixture was stirred vigorously for 12 h at 6 °C under 1 atm of oxygen. Solvent was removed *in vacuo*. The conversion of the reaction was measured by ratio of product/SM in <sup>1</sup>H NMR of the crude mixture and is shown as a function of solvent in Table S2.

**Table S2. Evaluation of solvent in the reaction**

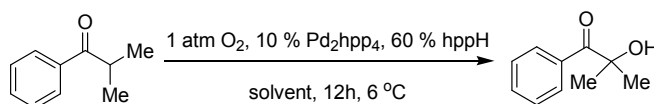

| Solvent       | Conversion (vs SM) |
|---------------|--------------------|
| THF           | 82 %               |
| toluene       | 82 %               |
| benzene       | 60 %               |
| ether         | 72 %               |
| nitromethane  | 0 %                |
| acetone       | < 5 %              |
| ethyl acetate | 68 %               |
| dioxane       | 53 %               |
| acetonitrile  | 52 %               |

THF has been chosen as solvent, but similar results can be obtained with toluene or benzene. Table S3 shows the reaction yields of hydroxylated products for a selection of nine substrates.

**Table S3. Hydroxylation in THF, benzene, and toluene**

| Product | THF                | benzene          | Product | THF              | benzene          | toluene |
|---------|--------------------|------------------|---------|------------------|------------------|---------|
|         | 96% <sup>a,b</sup> | 99% <sup>b</sup> |         | 77% <sup>b</sup> | 50% <sup>b</sup> | n.d.    |
|         | 94% <sup>b</sup>   | 85% <sup>b</sup> |         | 99%              | 99%              | 99%     |
|         | 88%                | 84%              |         | 70%              | n.d.             | 70%     |
|         | 97%                | 73%              |         | 70%              | n.d.             | 60%     |
|         | 70%                | 70%              |         |                  |                  |         |

<sup>a</sup> 2.5 mol% of 1 was used. <sup>b</sup> no 2 was added

## Oxidant O<sub>2</sub> versus air in the reaction

General procedure: Example of Pd<sub>2</sub>hpp<sub>4</sub>-catalyzed α-hydroxylation of **3** to **4** in air.

To a solution of **1** (38 mg, 0.050 mmol, 0.050 equiv) in THF (10 mL) at 6 °C was added 3,4-dihydro-1-methylnaphthalen-2(1*H*)-one (160 mg, 1.00 mmol, 1.00 equiv) and the reaction mixture was stirred vigorously for 20 h at 6 °C under air. Solvent was removed *in vacuo* and the residue was purified by chromatography on silica gel eluting with hexanes / EtOAc (4:1) to afford 90 mg of compound **4** as a yellowish oil (51 % yield).

Scheme S1 shows the results of using air and O<sub>2</sub> at 1 atm in the Pd<sub>2</sub>hpp<sub>4</sub>-catalyzed alpha-hydroxylation reaction. Yields with air as oxidant are 20–30% lower.

**Scheme S1. Result of using O<sub>2</sub> versus air in the reaction**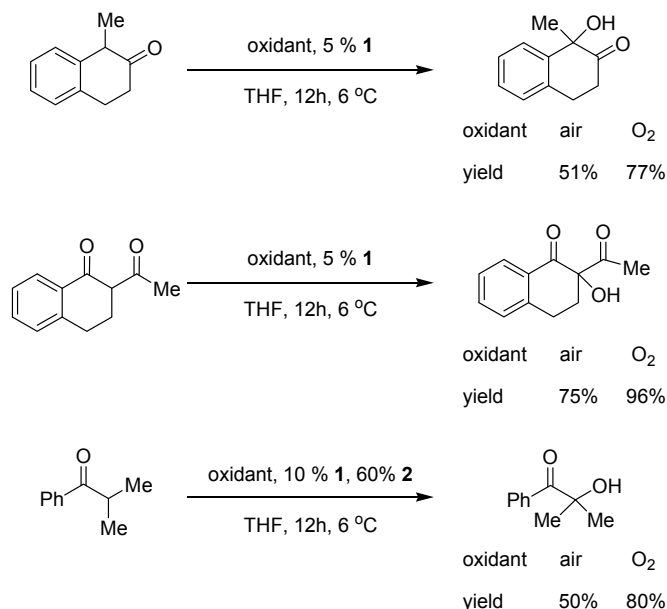**Determination of peroxide content in THF**

We determined the content of peroxide content in THF after vigorous stirring of THF under 1 atm of O<sub>2</sub> at 6 °C for 12 h by standard iodometric titration using KI and Na<sub>2</sub>S<sub>2</sub>O<sub>3</sub><sup>2</sup>:

Distilled THF (without BHT): 0.003M of peroxide.

THF with BHT: 0.001M of peroxide.

THF with BHT was used in all examples of Pd<sub>2</sub>hpp<sub>4</sub>-catalyzed hydroxylation reaction. Using pre-aerated (as described previously) THF (without BHT) in the Pd<sub>2</sub>hpp<sub>4</sub>-catalyzed hydroxylation reaction of 1-methyl-2-tetralone resulted in only trace amounts of product. This result together with the fact that the reaction could be carried out in benzene/toluene, exclude the possibility of THF peroxide being responsible for the oxidation of substrates in the title reaction. It also shows that THF peroxide is not accumulated as a dangerous byproduct during the reaction to significant levels. For large scale applications, we recommend toluene as a suitable substitute solvent.

**Comparison of Pd/C to Pd<sub>2</sub>hpp<sub>4</sub>-catalyzed α-hydroxylation**

In reference 9e (Monguchi, Y. *et al. Synlett* **2008**, 15, 2291), the author reported α-hydroxylation of beta-ketoesters using Pd/C and O<sub>2</sub> with stoichiometric Et<sub>3</sub>N as base and reducing reagent. The author proposed that the reaction proceeded through a radical mechanism based on a result shown in Scheme S2. Homocoupling product instead of hydroxylation product was obtained. However,

<sup>2</sup> www.basf.com/diols/pdfs/thf\_brochure.pdf



with the same substrate using Pd<sub>2</sub>hpp<sub>4</sub> as catalyst under our presented reaction conditions, 90% of the hydroxylated product was obtained (Scheme S2).

### Scheme S2. $\alpha$ -Homo-coupling and $\alpha$ -hydroxylation of 2-phenyl-1,3-indandione

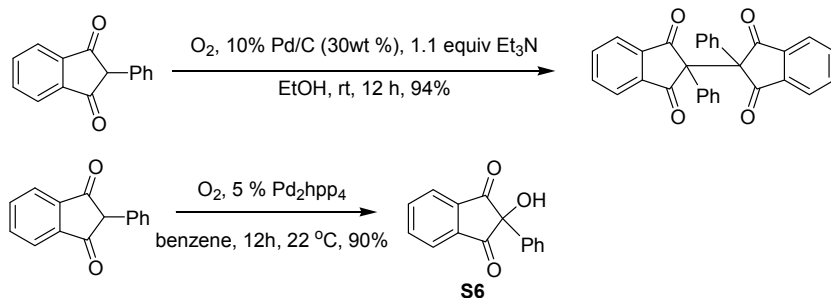

### Detection of hydroperoxide in Pd<sub>2</sub>hpp<sub>4</sub>-catalyzed $\alpha$ -hydroxylation

In the isolation of all products presented in the Pd<sub>2</sub>hpp<sub>4</sub>-catalyzed  $\alpha$ -hydroxylation, no hydroperoxides were detected by mass spectrometry of the products. As shown in the following scheme, we independently prepared a known  $\alpha$ -hydroperoxide and compared the massspec of Pd<sub>2</sub>hpp<sub>4</sub>-catalyzed  $\alpha$ -hydroxylation of the same starting compound.<sup>3</sup> No hydroperoxide, or its fragmentation was found in the Pd<sub>2</sub>hpp<sub>4</sub>-catalyzed reaction mixture.

### Scheme S3. Hydroperoxylation and hydroxylation of phenylbutazone

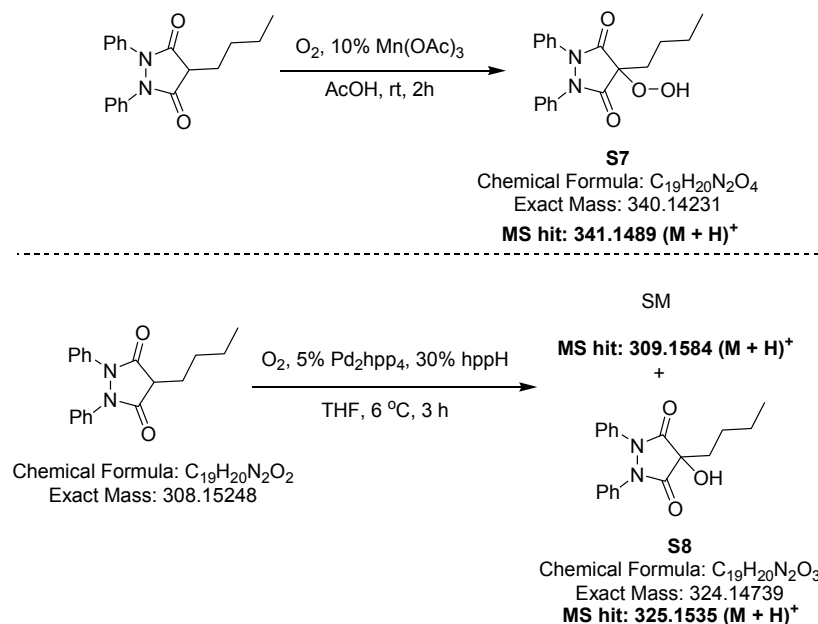

<sup>3</sup> Rahman, M. T.; Nishino, H. *Org. Lett.* **2003**, *5*, 2887.

## Experimental Procedures and Compound Characterization

### Pd<sub>2</sub>hpp<sub>4</sub> (1)

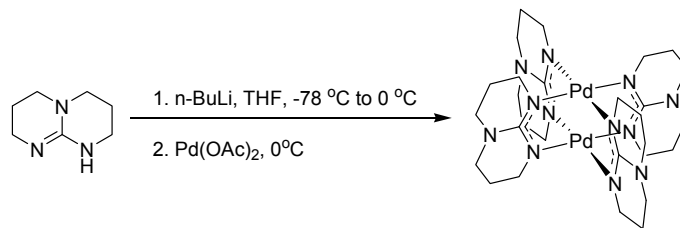

To a solution of 1,5,7-Triazabicyclo[4.4.0]dec-5-ene (2.78 g, 20.0 mmol, 1.00 equiv) in dry and degassed THF (200 ml) was added 2.5 M n-BuLi (8.8 mL, 22 mmol, 1.1 equiv) at -78 °C. The resulting mixture was warmed to 0 °C and was stirred for 3 h at 0 °C. Pd(OAc)<sub>2</sub> (2.25 g, 10.0 mmol, 0.50 equiv) was added to the reaction. The reaction mixture was heated to boiling and filtered. Solvent was removed *in vacuo* and the residue was dissolved in benzene (100mL). Red crystals (2.50 g, 3.26 mmol, 65 %) of **1** were obtained by vapor diffusion of hexanes into the benzene solution. NMR Spectroscopy: <sup>1</sup>H NMR (500 MHz, C<sub>6</sub>D<sub>6</sub> 25 °C, δ): 3.73 (t, *J* = 7.5 Hz, 16 H), 2.70 (t, *J* = 7.5 Hz, 16 H), 1.74 (pentet, *J* = 7.5 Hz, 16 H).<sup>4</sup>

### *tert*-Butyl 3-(2-methyl-3-oxobutanoyl)-1*H*-indole-1-carboxylate (S1)

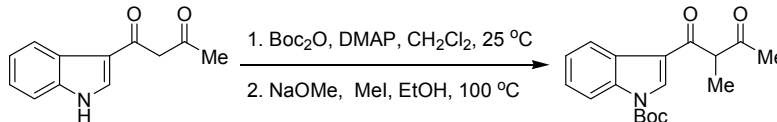

To a solution of 1-(1*H*-indol-3-yl)butane-1,3-dione (2.00 g, 9.93 mmol, 1.00 equiv) and DMAP (40 mg, 0.33 mmol, 0.33 equiv) in dry CH<sub>2</sub>Cl<sub>2</sub> (25 ml) was added di-*tert*-butyl dicarbonate (2.17 g, 9.93 mmol, 1.00 equiv). The resulting mixture was stirred at 0 °C for 1 h and warmed to 25 °C for 12 h. Solvent was removed *in vacuo* and the residue was triturated with ether (2 x 25 ml) to afford 2.50 g of the NBoc- protected indole product as a yellow solid (84 % yield). The latter was used in the next step without further purification.

To a solution of the NBoc- protected indole product (500 mg, 1.74 mmol, 1.00 equiv) obtained from previous step in dry EtOH (8 ml) at 0 °C was added NaOMe (142 mg, 2.62 mmol, 1.50 equiv). The orange colored reaction mixture was stirred for 20 min at 0 °C and MeI (247 mg, 1.74 mmol, 1.00 equiv) was added. The reaction was heated to reflux (100 °C) for 18 h, and then additional MeI (296 mg, 2.09 mmol, 1.20 equiv) was added. The reaction was heated at 100 °C for 10 h, cooled to 25 °C, and quenched with 10 mL of sat. NH<sub>4</sub>Cl(aq). The aqueous layer was

<sup>4</sup> Cotton, F. A.; Gu, J.; Murillo, C. A.; Timmons, D. J. *J. Am. Chem. Soc.* **1998**, *120*, 13280.

extracted with EtOAc (3 × 10 ml) and the combined organic phases were dried with Na<sub>2</sub>SO<sub>4</sub>. Solvent was removed *in vacuo* and the residue was purified by chromatography on silica gel eluting with hexanes / EtOAc (10:1) to afford 300 mg of **S1** as a light yellow solid (55 % yield).

$R_f$  = 0.30 (hexanes : EtOAc = 10 : 1). NMR Spectroscopy: <sup>1</sup>H NMR (500 MHz, CDCl<sub>3</sub>, 25 °C, δ): 8.38 (d,  $J$  = 7.5 Hz, 1 H), 8.33 (s, 1H), 8.13 (d,  $J$  = 7.5 Hz, 1 H), 7.41–7.35 (m, 2 H), 4.28 (q,  $J$  = 7 Hz, 1 H), 2.19 (s, 3 H), 1.72 (s, 9 H), 1.49 (d,  $J$  = 7 Hz, 3 H). <sup>13</sup>C NMR (125 MHz, CDCl<sub>3</sub>, 25 °C, δ): 205.14(C), 192.60(C), 148.87(C), 135.57(C), 133.08(CH), 127.37(C), 125.83(CH), 124.62(CH), 122.67(CH), 119.37(C), 115.00(C), 85.74(C), 58.95(CH), 28.06(C), 27.43(CH<sub>3</sub>), 13.69(CH<sub>3</sub>). Mass Spectrometry: HRMS-FIA (m/z): Calcd for [C<sub>18</sub>H<sub>21</sub>NO<sub>4</sub> + H], 316.1543. Found, 316.1547.

### 5-((3*aR*,6*S*,6*aS*)-Hexahydro-2-oxo-1*H*-thieno[3,4-*d*]imidazol-6-yl)pentyl 2,2-diphenylacetate (**S2**)

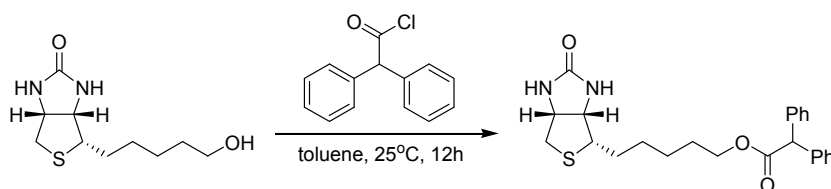

To diphenylacetic acid (507 mg, 2.39 mmol, 1.10 equiv) in a 25 mL flame-dried round bottom flask was added SOCl<sub>2</sub> (10 mL) at 0 °C. The reaction mixture was heated at reflux for 2 h. SOCl<sub>2</sub> was removed by distillation at 60 mbar. The resulting acyl chloride was dissolved in dry toluene (10 mL) and added via syringe to a vigorously stirring suspension of (3*aR*,6*S*,6*aS*)-tetrahydro-6-(5-hydroxypentyl)-1*H*-thieno[3,4-*d*]imidazol-2(3*H*)-one (500 mg, 2.17 mmol, 1.00 equiv) in toluene (20 mL) at 23 °C and stirred for 12 h. Solvent was removed *in vacuo* and the residue was purified by chromatography on silica gel eluting with CH<sub>2</sub>Cl<sub>2</sub> / MeOH (10:1) to afford 650 mg of compound **S2** as a light yellow solid (71 % yield).

$R_f$  = 0.30 (CH<sub>2</sub>Cl<sub>2</sub> : MeOH = 10 : 1). NMR Spectroscopy: <sup>1</sup>H NMR (500 MHz, CDCl<sub>3</sub>, 25 °C, δ): 7.25–7.22 (m, 10 H), 5.36 (s, 1H), 5.06 (s, 1 H), 5.02 (s, 1 H), 4.47 (dd,  $J$  = 7.5 Hz, 5.0 Hz, 1 H), 4.24 (dd,  $J$  = 7.5 Hz, 5.0 Hz, 1 H), 4.15 (t,  $J$  = 6.5 Hz, 2 H), 3.09 (dd,  $J$  = 1.0 Hz,  $J$  = 0.5 Hz, 1 H), 2.89 (dd,  $J$  = 1.5 Hz,  $J$  = 0.5 Hz, 1 H), 2.70 (d,  $J$  = 1.0 Hz, 1 H), 1.67–1.54 (m, 4 H), 1.42–1.25 (m, 4 H). <sup>13</sup>C NMR (125 MHz, CDCl<sub>3</sub>, 25 °C, δ): 172.55(C), 163.87(C), 138.66(C), 128.54(CH), 128.48(CH), 127.15(CH), 65.11(CH<sub>2</sub>), 61.86(CH), 60.04(CH), 57.09(CH), 55.49(CH), 40.46(CH<sub>2</sub>), 28.39(CH<sub>2</sub>), 28.35(CH<sub>2</sub>), 28.15(CH<sub>2</sub>), 25.63(CH<sub>2</sub>). Mass Spectrometry: HRMS-FIA (m/z): Calcd for [C<sub>24</sub>H<sub>28</sub>N<sub>2</sub>O<sub>3</sub>S + Na], 447.1713. Found, 447.1713.

### 3,4-dihydro-2-(pent-4-enyl)naphthalen-1(2*H*)-one (**S10**)

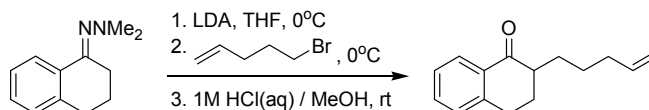

To a solution of diisopropylamine (7.9 mL, 11 mmol, 1.1 equiv) in dry THF (25 ml) at  $-78^{\circ}\text{C}$  was added 1.6 M n-Butyl lithium (6.9 mL, 11 mmol, 1.1 equiv). The mixture was warmed to at  $0^{\circ}\text{C}$  and stirred at  $0^{\circ}\text{C}$  for 1 h. 1-(2,3-dihydronaphthalen-4(1*H*)-ylidene)-2,2-dimethylhydrazine (1.8 g, 10 mmol, 1.0 equiv) was added to the reaction and the mixture was stirred at  $0^{\circ}\text{C}$  for 1 h. 5-bromo-1-pentene was added to the reaction and the mixture was stirred at  $0^{\circ}\text{C}$  for 12 h. The reaction mixture was quenched with 30 mL of sat.  $\text{NH}_4\text{Cl}(\text{aq})$ . The aqueous layer was extracted with EtOAc (3  $\times$  30 ml) and the combined organic phases were dried with  $\text{Na}_2\text{SO}_4$ . Solvent was removed *in vacuo*. The residue was dissolved in 40 mL MeOH. 30 mL of 1 M HCl (aq) was added and the mixture was stirred at  $23^{\circ}\text{C}$  for 12 h. MeOH was removed *in vacuo*. The residue aqueous mixture was extracted with EtOAc (3  $\times$  30 ml) and the combined organic phases were dried with  $\text{Na}_2\text{SO}_4$ . The residue was purified by chromatography on silica gel eluting with hexanes / EtOAc (12:1) to afford 1850 mg of **S1** as a light yellow oil (86 % yield).

$R_f = 0.50$  (hexanes : EtOAc = 12 : 1).  $^1\text{H}$  NMR (500 MHz,  $\text{CDCl}_3$ ,  $25^{\circ}\text{C}$ ,  $\delta$ ): 8.03 (d,  $J = 7.5$  Hz, 1 H), 7.45 (t,  $J = 7.5$  Hz, 1 H), 7.29 (t,  $J = 7.5$  Hz, 1 H), 7.22 (d,  $J = 7.5$  Hz, 1 H), 5.83 (ddt,  $J = 17$  Hz,  $J = 10$  Hz,  $J = 6.5$  Hz, 1 H), 5.02 (dd,  $J = 17$  Hz,  $J = 1.5$  Hz, 1 H), 4.95 (d,  $J = 10$  Hz, 1 H), 3.03–2.97 (m, 2 H), 2.50–2.45 (m, 1 H), 2.62–2.21 (m, 1 H), 2.13–2.08 (m, 2 H), 1.99–1.86 (m, 2 H), 1.57–1.46 (m, 3 H).  $^{13}\text{C}$  NMR (125 MHz,  $\text{CDCl}_3$ ,  $25^{\circ}\text{C}$ ,  $\delta$ ): 199.23(C), 143.39(C), 138.08(CH), 132.54(CH), 132.06(C), 128.21(CH), 126.85(CH), 126.00(CH), 114.15( $\text{CH}_2$ ), 46.88(CH), 33.47( $\text{CH}_2$ ), 28.58 ( $\text{CH}_2$ ), 27.96( $\text{CH}_2$ ), 27.88( $\text{CH}_2$ ), 25.87( $\text{CH}_2$ ). Mass Spectrometry: HRMS-FIA (m/z): Calcd for [ $\text{C}_{15}\text{H}_{18}\text{O} + \text{H}$ ], 215.1430. Found, 215.1436.

### 3,4-Dihydro-1-hydroxy-1-methylnaphthalen-2(1*H*)-one (4)

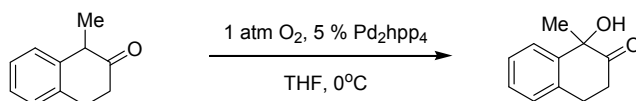

To a solution of  $\text{Pd}_2\text{hpp}_4$  (38 mg, 0.050 mmol, 0.050 equiv) in THF (10 mL) at  $0^{\circ}\text{C}$  was added 3,4-dihydro-1-methylnaphthalen-2(1*H*)-one (160 mg, 1.00 mmol, 1.00 equiv) and the reaction mixture was stirred vigorously for 20 h at  $0^{\circ}\text{C}$  under 1 atm of oxygen. Solvent was removed *in vacuo* and the residue was purified by chromatography on silica gel eluting with hexanes / EtOAc (4:1) to afford 135 mg of compound **4** as a yellowish oil (77 % yield).

$R_f = 0.35$  (EtOAc : hexanes = 1 : 4). NMR Spectroscopy:  $^1\text{H}$  NMR (500 MHz,  $\text{CDCl}_3$ ,  $25^{\circ}\text{C}$ ,  $\delta$ ): 7.66 (dd,  $J = 7.5$  Hz,  $J = 1$  Hz, 1 H), 7.34–7.31 (m, 1 H), 7.27–7.24 (m, 1 H), 7.17 (d,  $J = 8.5$  Hz, 1 H), 3.93 (s, 1 H), 3.31 (ddd,  $J = 9$  Hz,  $J = 9$  Hz,  $J = 9$  Hz, 1H), 3.09 (ddd,  $J = 16.5$  Hz,  $J = 9$  Hz,  $J = 4$  Hz, 1H), 2.96 (ddd,  $J = 16.5$  Hz,  $J = 9$  Hz,  $J = 4$  Hz, 1H), 2.65 (ddd,  $J = 9$  Hz,  $J = 9$  Hz,  $J = 8$  Hz, 1H), 1.56 (s, 3 H).  $^{13}\text{C}$  NMR (125 MHz,  $\text{CDCl}_3$ ,  $25^{\circ}\text{C}$ ,  $\delta$ ): 212.95(C), 140.75(C), 133.70(C), 127.66(CH), 127.60(CH), 127.49(CH), 125.27(CH), 76.04(C), 33.43( $\text{CH}_2$ ), 27.79( $\text{CH}_2$ ), 27.68( $\text{CH}_3$ ). Mass Spectrometry: HRMS-FIA (m/z): Calcd for [ $\text{C}_{11}\text{H}_{12}\text{O}_2 + \text{Na}$ ], 199.0730. Found, 199.0724.

**2-Acetyl-3,4-dihydro-2-hydroxynaphthalen-1(2H)-one (5)**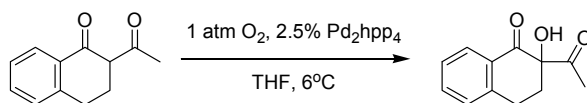

To a solution of Pd<sub>2</sub>hpp<sub>4</sub> (10 mg, 0.013 mmol, 0.025 equiv) in THF (5 mL) at 6 °C was added 2-acetyl-3,4-dihydronaphthalen-1(2H)-one (94 mg, 0.50 mmol, 1.0 equiv) and the reaction mixture was stirred vigorously for 12 h at 6 °C under 1 atm of oxygen. Solvent was removed *in vacuo* and the residue was purified by chromatography on silica gel eluting with hexanes / EtOAc (2:1) to afford 98 mg of compound **5** as a white solid (96 % yield).

R<sub>f</sub> = 0.30 (EtOAc : hexanes = 1 : 2). NMR Spectroscopy: <sup>1</sup>H NMR (500 MHz, CDCl<sub>3</sub>, 25 °C, δ): 8.02 (d, *J* = 7 Hz, 1 H), 7.53 (t, *J* = 7 Hz, 1 H), 7.33 (t, *J* = 7 Hz, 1 H), 4.64 (s, 1 H), 3.12 (m, 2 H), 2.60 (td, *J* = 5 Hz, *J* = 14 Hz, 1 H), 2.28 (s, 3 H), 2.22–2.16 (m, 1 H). <sup>13</sup>C NMR (125 MHz, CDCl<sub>3</sub>, 25 °C, δ): 206.85(C), 196.55(C), 144.15(C), 134.46(CH), 130.39(C), 128.92(CH), 127.76(CH), 126.87(CH), 81.73(C), 32.28(CH<sub>2</sub>), 25.47(CH<sub>2</sub>), 24.99(CH<sub>3</sub>). Mass Spectrometry: HRMS-FIA (m/z): Calcd for [C<sub>12</sub>H<sub>12</sub>O<sub>3</sub> + Na], 227.0679. Found, 227.0673.

**Ethyl 2-cyclopropyl-2-hydroxy-3-oxobutanoate (6)**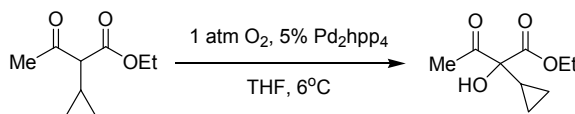

To a solution of Pd<sub>2</sub>hpp<sub>4</sub> (19 mg, 0.025 mmol, 0.05 equiv) in THF (4 mL) at 6 °C was added ethyl 2-cyclopropyl-3-oxobutanoate (85 mg, 0.50 mmol, 1.0 equiv) and the reaction mixture was stirred vigorously for 12 h at 6 °C under 1 atm of oxygen. Solvent was removed *in vacuo* and the residue was purified by chromatography on silica gel eluting with hexanes / EtOAc (6:1) to afford 87 mg of compound **6** as a colorless oil (94 % yield).

R<sub>f</sub> = 0.25 (EtOAc : hexanes = 1 : 6) NMR Spectroscopy: <sup>1</sup>H NMR (500 MHz, CDCl<sub>3</sub>, 25 °C, δ): 4.28 (qd, *J* = 7 Hz, *J* = 1 Hz, 2 H), 3.88 (s, 1 H), 1.65–1.59 (m, 1 H), 1.31 (t, *J* = 7 Hz, 3 H), 0.64–0.60 (m, 1 H), 0.50–0.39 (m, 2 H), 0.37–0.32 (m, 1 H). <sup>13</sup>C NMR (125 MHz, CDCl<sub>3</sub>, 25 °C, δ): 204.72(C), 171.07(C), 81.11(C), 62.41(CH<sub>2</sub>), 24.51(CH<sub>3</sub>), 14.45(CH), 13.97(CH<sub>2</sub>), 0.17(CH<sub>2</sub>), -0.35(CH<sub>2</sub>). Mass Spectrometry: HRMS-FIA (m/z): Calcd for [C<sub>9</sub>H<sub>14</sub>O<sub>4</sub> + Na], 209.0784. Found, 209.0786.

**Methyl 1-hydroxy-4-methoxy-2-oxocyclopent-3-enecarboxylate (7)**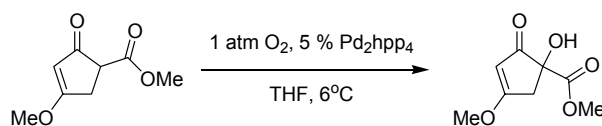

To a solution of Pd<sub>2</sub>hpp<sub>4</sub> (19 mg, 0.010 mmol, 0.050 equiv) in THF (2 mL) at 6 °C was added

methyl 4-methoxy-2-oxocyclopent-3-enecarboxylate (35 mg, 0.20 mmol, 1.0 equiv) and the reaction was stirred vigorously for 12 h at 6 °C under 1 atm of oxygen. Solvent was removed *in vacuo* and the residue was purified by chromatography on silica gel eluting with hexanes / EtOAc (1:1) to afford 36 mg of compound **7** as a white solid (97 % yield).

$R_f = 0.20$  (EtOAc : hexanes = 1 : 1) NMR Spectroscopy:  $^1\text{H}$  NMR (500 MHz,  $\text{CDCl}_3$ , 25 °C,  $\delta$ ): 5.34 (s, 1H), 3.94 (s, 3 H), 3.80 (s, 3 H), 3.18 (d,  $J = 17.5$  Hz, 1 H), 2.75 (d,  $J = 17.5$  Hz, 1 H).  $^{13}\text{C}$  NMR (125 MHz,  $\text{CDCl}_3$ , 25 °C,  $\delta$ ): 199.40(C), 189.94(C), 171.47(C), 101.01(CH), 79.01(C), 59.15(CH<sub>3</sub>), 53.40(CH<sub>3</sub>), 40.52(CH<sub>2</sub>). Mass Spectrometry: HRMS-FIA (m/z): Calcd for [ $\text{C}_8\text{H}_{10}\text{O}_5 + \text{H}$ ], 187.0601. Found, 187.0603.

### Ethyl 1-hydroxy-2-methyl-4-oxocyclohex-2-enecarboxylate (**8**)

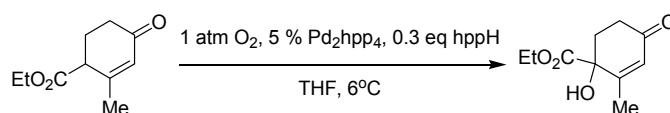

To a solution of  $\text{Pd}_2\text{hpp}_4$  (16 mg, 0.020 mmol, 0.050 equiv) in THF (4 mL) at 6 °C was added ethyl 2-methyl-4-oxocyclohex-2-enecarboxylate (73 mg, 0.40 mmol, 1.0 equiv) and the reaction mixture was stirred vigorously for 12 h at 6 °C under 1 atm of oxygen. Solvent was removed *in vacuo* and the residue was purified by chromatography on silica gel eluting with hexanes / EtOAc (1:1) to afford 72 mg of compound **8** as a pale yellow oil (90 % yield).

$R_f = 0.20$  (EtOAc : hexanes = 1 : 1). NMR Spectroscopy:  $^1\text{H}$  NMR (500 MHz,  $\text{CDCl}_3$ , 25 °C,  $\delta$ ): 4.37–4.32 (m, 2 H), 3.77 (s, 1 H), 2.65–2.61 (m, 2 H), 2.41–2.36 (m, 1 H), 2.25–2.20 (m, 1 H), 1.91 (s, 3 H), 1.33 (t,  $J = 7.5$  Hz, 3 H).  $^{13}\text{C}$  NMR (125 MHz,  $\text{CDCl}_3$ , 25 °C,  $\delta$ ): 197.90(C), 174.18(C), 157.35(C), 129.17(CH), 73.92(C), 63.02(CH<sub>2</sub>), 33.81(CH<sub>2</sub>), 33.61(CH<sub>2</sub>), 18.57(CH<sub>3</sub>), 13.97(CH<sub>3</sub>). Mass Spectrometry: HRMS-FIA (m/z): Calcd for [ $\text{C}_{10}\text{H}_{14}\text{O}_4 - \text{OCH}_2\text{CH}_3$ ], 153.0552. Found, 153.0545.

### 2,3-Dihydro-2-hydroxy-2-methylinden-1-one (**9**)

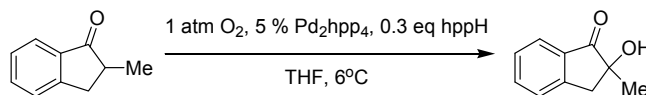

To a solution of  $\text{Pd}_2\text{hpp}_4$  (19 mg, 0.025 mmol, 0.050 equiv) and hppH (21 mg, 0.15 mmol, 0.30 equiv) in THF (2 mL) at 6 °C was added 2,3-dihydro-2-methylinden-1-one (73 mg, 0.50 mmol, 1.0 equiv) and the reaction mixture was stirred vigorously for 12 h at 6 °C under 1 atm of oxygen. Solvent was removed *in vacuo* and the residue was purified by chromatography on silica gel eluting with hexanes / EtOAc (3:1) to afford 71 mg of compound **9** as a colorless oil (88 % yield).

$R_f = 0.25$  (EtOAc : hexanes = 1 : 3). NMR Spectroscopy:  $^1\text{H}$  NMR (500 MHz,  $\text{CDCl}_3$ , 25 °C,  $\delta$ ): 7.79 (d,  $J = 8$  Hz, 1 H), 7.64 (t,  $J = 8$  Hz, 1 H), 7.45–7.29 (m, 2 H), 3.25 (ABq,  $\Delta\nu_{\text{AB}} = 19$  Hz,  $J_{\text{AB}} = 17$  Hz, 2 H), 2.57 (s, 1 H), 1.45 (s, 3H).  $^{13}\text{C}$  NMR (125 MHz,  $\text{CDCl}_3$ , 25 °C,  $\delta$ ): 208.05(C),

151.15(C), 135.78(CH), 133.49(C), 127.81(CH), 126.70(CH), 124.86(CH), 77.36(C), 42.19(CH<sub>2</sub>), 25.56(CH<sub>3</sub>). Mass Spectrometry: HRMS-FIA (m/z): Calcd for [C<sub>10</sub>H<sub>10</sub>O<sub>2</sub> + Na], 185.0573. Found, 185.0540.

### 3,4-Dihydro-2-hydroxy-2-methylnaphthalen-1(2H)-one (10)

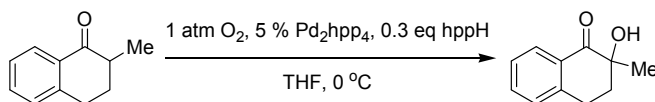

To a solution of Pd<sub>2</sub>hpp<sub>4</sub> (38 mg, 0.050 mmol, 0.050 equiv) and hppH (42 mg, 0.30 mmol, 0.30 equiv) in THF (10 mL) at 0 °C was added 3,4-dihydro-2-methylnaphthalen-1(2H)-one (160 mg, 1.00 mmol, 1.00 equiv) and the reaction mixture was stirred vigorously for 12 h at 0 °C under 1 atm of oxygen. Solvent was removed *in vacuo* and the residue was purified by chromatography on silica gel eluting with hexanes / EtOAc (4:1) to afford 160 mg of compound **10** as a white solid (91 % yield).

R<sub>f</sub> = 0.30 (EtOAc : hexanes = 1 : 4). NMR Spectroscopy: <sup>1</sup>H NMR (500 MHz, CDCl<sub>3</sub>, 25 °C, δ): 8.03 (d, *J* = 7.5 Hz, 1 H), 7.52 (t, *J* = 7.5 Hz, 1 H), 7.43 (t, *J* = 7.5 Hz, 1 H), 7.26 (d, *J* = 7.5 Hz, 1 H), 3.85 (s, 1 H), 3.14–3.00 (m, 2 H), 2.86–2.16 (m, 2 H), 1.39 (s, 3 H). <sup>13</sup>C NMR (125 MHz, CDCl<sub>3</sub>, 25 °C, δ): 201.52(C), 143.24(C), 133.86(CH), 129.79(C), 128.83(CH), 127.82(CH), 126.68(CH), 73.41(C), 35.73(CH<sub>2</sub>), 26.62(CH<sub>2</sub>), 23.70(CH<sub>3</sub>). Mass Spectrometry: HRMS-FIA (m/z): Calcd for [C<sub>11</sub>H<sub>12</sub>O<sub>2</sub> + Na], 199.0730. Found, 199.0727.

### Diethyl 2-hydroxy-2-phenylmalonate (11)

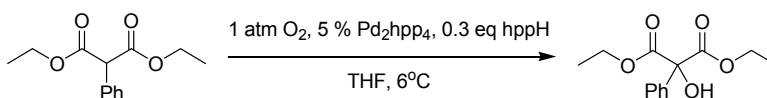

To a solution of Pd<sub>2</sub>hpp<sub>4</sub> (8 mg, 0.01 mmol, 0.05 equiv) and hppH (8.5 mg, 0.060 mmol, 0.30 equiv) in THF (1.5 mL) at 6 °C was added diethyl 2-phenylmalonate (47 mg, 0.20 mmol, 1.0 equiv) and the reaction mixture was stirred vigorously for 12 h at 6 °C under 1 atm of oxygen. Solvent was removed *in vacuo* and the residue was purified by chromatography on silica gel eluting with hexanes / EtOAc (5:1) to afford 49 mg of compound **11** as a white solid (97 % yield).

R<sub>f</sub> = 0.25 (EtOAc : hexanes = 1 : 5). NMR Spectroscopy: <sup>1</sup>H NMR (500 MHz, CDCl<sub>3</sub>, 25 °C, δ): 7.66–7.64 (m, 2 H), 7.39–7.34 (m, 3 H), 4.36–4.25 (m, 5 H), 1.29 (t, *J* = 8.5 Hz, 6 H). <sup>13</sup>C NMR (125 MHz, CDCl<sub>3</sub>, 25 °C, δ): 169.85(C), 135.90(C), 128.55(CH), 127.93(CH), 126.60(CH), 79.94(C), 62.94(CH<sub>2</sub>), 13.89(CH<sub>3</sub>). Mass Spectrometry: HRMS-FIA (m/z): Calcd for [C<sub>13</sub>H<sub>16</sub>O<sub>5</sub> + Na], 275.0890. Found, 275.0893.

**2-Hydroxy-2-phenylcyclohexanone (12)**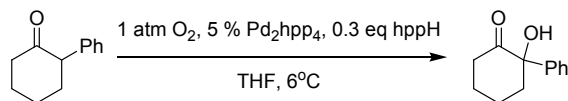

To a solution of Pd<sub>2</sub>hpp<sub>4</sub> (38 mg, 0.050 mmol, 0.050 equiv) and hppH (42 mg, 0.30 mmol, 0.30 equiv) in THF (10 mL) at 6 °C was added 2-phenylcyclohexanone (174 mg, 1.00 mmol, 1.00 equiv) and the reaction mixture was stirred vigorously for 12 h at 6 °C under 1 atm of oxygen. Solvent was removed *in vacuo* and the residue was purified by chromatography on silica gel eluting with hexanes / EtOAc (4:1) to afford 133 mg of compound **12** as a white solid (70 % yield).

R<sub>f</sub> = 0.30 (EtOAc : hexanes = 1 : 4). NMR Spectroscopy: <sup>1</sup>H NMR (500 MHz, CDCl<sub>3</sub>, 25 °C, δ): 7.41–7.37 (m, 2 H), 7.33–7.30 (m, 3 H), 4.49 (s, 1 H), 3.02–2.98 (m, 1 H), 2.55–2.52 (m, 1 H), 2.46–2.39 (m, 1 H), 2.08–2.03 (m, 1 H), 1.88–1.71 (m, 4 H), . <sup>13</sup>C NMR (125 MHz, CDCl<sub>3</sub>, 25 °C, δ): 212.67(C), 139.92(C), 129.11(CH), 128.29(CH), 126.35(CH), 80.02(C), 38.87(CH<sub>2</sub>), 38.82(CH<sub>2</sub>), 28.31(CH<sub>2</sub>), 23.03(CH<sub>2</sub>). Mass Spectrometry: HRMS-FIA (m/z): Calcd for [C<sub>12</sub>H<sub>14</sub>O<sub>2</sub> + K], 229.0625. Found, 225.0635.

**2-Hydroxy-1,2-diphenylpropan-1-one (13)**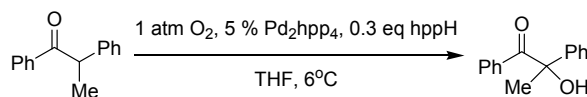

In THF: To a solution of Pd<sub>2</sub>hpp<sub>4</sub> (8 mg, 0.01 mmol, 0.05 equiv) and hppH (8.5 mg, 0.060 mmol, 0.30 equiv) in THF (2 mL) at 6 °C was added 1,2-diphenylpropan-1-one (42 mg, 0.20 mmol, 1.0 equiv) and the reaction mixture was stirred vigorously for 12 h at 6 °C under 1 atm of oxygen. Solvent was removed *in vacuo* and the residue was purified by chromatography on silica gel eluting with hexanes / EtOAc (8:1) to afford 45 mg of compound **13** as a white solid (99 % yield).

In toluene: To a solution of Pd<sub>2</sub>hpp<sub>4</sub> (8 mg, 0.01 mmol, 0.05 equiv) and hppH (8.5 mg, 0.060 mmol, 0.30 equiv) in toluene (2 mL) at 6 °C was added 1,2-diphenylpropan-1-one (42 mg, 0.20 mmol, 1.0 equiv) and the reaction mixture was stirred vigorously for 12 h at 6 °C under 1 atm of oxygen. Solvent was removed *in vacuo* and the residue was purified by chromatography on silica gel eluting with hexanes / EtOAc (8:1) to afford 45 mg of compound **13** as a white solid (99 % yield).

R<sub>f</sub> = 0.30 (EtOAc : hexanes = 1 : 8). NMR Spectroscopy: <sup>1</sup>H NMR (500 MHz, CDCl<sub>3</sub>, 25 °C, δ): 7.67–7.64 (m, 2 H), 7.45–7.41 (m, 3 H), 7.38–7.35 (m, 2 H), 7.32–7.25 (m, 3 H), 4.74 (s, 1 H), 1.88 (s, 3 H). <sup>13</sup>C NMR (125 MHz, CDCl<sub>3</sub>, 25 °C, δ): 201.96(C), 142.41(C), 133.40(C), 132.96(CH), 130.17(CH), 128.94(CH), 128.25(CH), 128.17(CH), 125.91(CH), 79.03(C), 26.00(CH<sub>3</sub>). Mass Spectrometry: HRMS-FIA (m/z): Calcd for [C<sub>15</sub>H<sub>14</sub>O<sub>2</sub> + Na], 249.0886. Found, 249.0878.



**1-Acetyl-3-hydroxy-3-methylindolin-2-one (14)**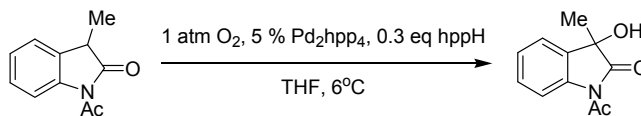

In THF: To a solution of Pd<sub>2</sub>hpp<sub>4</sub> (8 mg, 0.01 mmol, 0.05 equiv) and hppH (8.5 mg, 0.060 mmol, 0.30 equiv) in THF (2 mL) at 6 °C was added 1-acetyl-3-methylindolin-2-one (38 mg, 0.20 mmol, 1.0 equiv) and the reaction mixture was stirred vigorously for 12 h at 6 °C under 1 atm of oxygen. Solvent was removed *in vacuo* and the residue was purified by chromatography on silica gel eluting with CH<sub>2</sub>Cl<sub>2</sub> / MeOH (10:1) to afford 29 mg of compound **14** as a white solid (70 % yield).

In toluene: To a solution of Pd<sub>2</sub>hpp<sub>4</sub> (8 mg, 0.01 mmol, 0.05 equiv) and hppH (8.5 mg, 0.060 mmol, 0.30 equiv) in toluene (2 mL) at 6 °C was added 1-acetyl-3-methylindolin-2-one (38 mg, 0.20 mmol, 1.0 equiv) and the reaction mixture was stirred vigorously for 12 h at 6 °C under 1 atm of oxygen. Solvent was removed *in vacuo* and the residue was purified by chromatography on silica gel eluting with CH<sub>2</sub>Cl<sub>2</sub> / MeOH (10:1) to afford 29 mg of compound **14** as a white solid (70 % yield).

R<sub>f</sub> = 0.15 (CH<sub>2</sub>Cl<sub>2</sub> : MeOH = 10 : 1). NMR Spectroscopy: <sup>1</sup>H NMR (500 MHz, CDCl<sub>3</sub>, 25 °C, δ): 8.21 (d, *J* = 8 Hz, 1 H), 7.43 (d, *J* = 8 Hz, 1 H), 7.36 (t, *J* = 8 Hz, 1 H), 7.24 (t, *J* = 8 Hz, 1 H), 2.65 (s, 3 H), 1.63 (s, 3 H). <sup>13</sup>C NMR (125 MHz, CDCl<sub>3</sub>, 25 °C, δ): 179.01(C), 170.70(C), 139.13(C), 130.28(C), 130.17(CH), 125.81(CH), 123.23(CH), 116.92(CH), 73.56(C), 26.49(CH<sub>3</sub>), 25.68(CH<sub>3</sub>). Mass Spectrometry: HRMS-FIA (m/z): Calcd for [C<sub>11</sub>H<sub>11</sub>NO<sub>3</sub> + Na], 228.0631. Found, 228.0630.

**6-Hydroxy-4,4,6-trimethylcyclohex-2-enone (15)**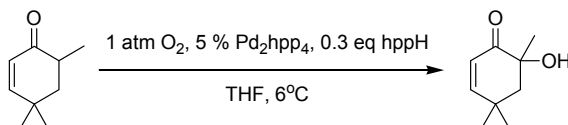

To a solution of Pd<sub>2</sub>hpp<sub>4</sub> (19 mg, 0.025 mmol, 0.050 equiv) and hppH (21 mg, 0.15 mmol, 0.30 equiv) in THF (5 mL) at 6 °C was added 4,4,6-trimethylcyclohex-2-enone (69 mg, 0.50 mmol, 1.0 equiv) and the reaction mixture was stirred vigorously for 12 h at 6 °C under 1 atm of oxygen. Solvent was removed *in vacuo* and the residue was purified by chromatography on silica gel eluting with hexanes / EtOAc (4:1) to afford 55 mg of compound **15** as a pale yellow oil (71 % yield).

R<sub>f</sub> = 0.30 (EtOAc : hexanes = 1 : 4). NMR Spectroscopy: <sup>1</sup>H NMR (500 MHz, CDCl<sub>3</sub>, 25 °C, δ): 6.62 (d, *J* = 10 Hz, 1 H), 5.91 (d, *J* = 10 Hz, 1 H), 3.36 (s, 1H), 2.03 (ABq, Δ<sub>v</sub><sub>AB</sub> = 20 Hz, *J*<sub>AB</sub> = 13.5 Hz, 2 H), 1.41 (s, 3 H), 1.26 (s, 3H), 1.19 (s, 3H). <sup>13</sup>C NMR (125 MHz, CDCl<sub>3</sub>, 25 °C, δ): 202.31(C), 159.51(CH), 122.94(CH), 72.17(C), 48.01(CH<sub>2</sub>), 34.17(C), 32.32(CH<sub>3</sub>), 28.07(CH<sub>3</sub>), 27.45(CH<sub>3</sub>). Mass Spectrometry: HRMS-FIA (m/z): Calcd for [C<sub>9</sub>H<sub>14</sub>O<sub>2</sub> + Na], 117.0886. Found,

117.0867.

**Methyl 2-hydroxy-2,2-diphenylacetate (16)**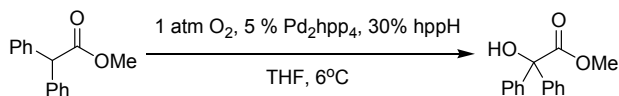

To a solution of Pd<sub>2</sub>hpp<sub>4</sub> (19 mg, 0.025 mmol, 0.050 equiv) and hppH (21 mg, 0.15 mmol, 0.30 equiv) in THF (2 mL) at 6 °C was added methyl 2,2-diphenylacetate (113 mg, 0.500 mmol, 1.00 equiv) and the reaction mixture was stirred vigorously for 12 h at 6 °C under 1 atm of oxygen. Solvent was removed *in vacuo* and the residue was purified by chromatography on silica gel eluting with hexanes / EtOAc (10:1) to afford 93 mg of compound **16** as a white solid (77 % yield).

R<sub>f</sub> = 0.30 (EtOAc : hexanes = 1 : 10). NMR Spectroscopy: <sup>1</sup>H NMR (500 MHz, CDCl<sub>3</sub>, 25 °C, δ): 7.43–7.32 (m, 10 H), 4.18 (s, 1H), 3.86 (s, 3 H). <sup>13</sup>C NMR (125 MHz, CDCl<sub>3</sub>, 25 °C, δ): 174.93(C), 141.87(C), 128.8(CH), 128.04(CH), 127.33(CH), 81.06(C), 53.52(CH<sub>3</sub>). Mass Spectrometry: HRMS-FIA (m/z): Calcd for [C<sub>15</sub>H<sub>14</sub>O<sub>3</sub> + H], 243.1016. Found, 243.1016.

**2-Hydroxy-2-methyl-1-(pyrrolidin-1-yl)butane-1,3-dione (17)**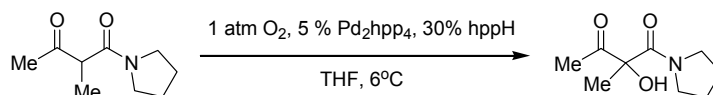

To a solution of Pd<sub>2</sub>hpp<sub>4</sub> (8 mg, 0.01 mmol, 0.05 equiv) and hppH (8.5 mg, 0.060 mmol, 0.30 equiv) in THF (2 mL) at 6 °C was added 2-methyl-1-(pyrrolidin-1-yl)butane-1,3-dione (34 mg, 0.20 mmol, 1.0 equiv) and the reaction mixture was stirred vigorously for 12 h at 6 °C under 1 atm of oxygen. Solvent was removed *in vacuo* and the residue was purified by chromatography on silica gel eluting with CH<sub>2</sub>Cl<sub>2</sub> / MeOH (10:1) to afford 30 mg of compound **17** as a white solid (80 % yield).

R<sub>f</sub> = 0.20 (CH<sub>2</sub>Cl<sub>2</sub> : MeOH = 10 : 1). NMR Spectroscopy: <sup>1</sup>H NMR (500 MHz, CDCl<sub>3</sub>, 25 °C, δ): 4.98 (s, 1 H), 3.54 (td, *J* = 7 Hz, *J* = 2 Hz, 2H), 3.47 (dt, *J* = 11 Hz, *J* = 7 Hz, 1H), 3.29 (dt, *J* = 11 Hz, *J* = 7 Hz, 1H), 2.22 (s, 3 H), 1.91–1.79 (m, 4 H), 1.55 (s, 3 H). <sup>13</sup>C NMR (125 MHz, CDCl<sub>3</sub>, 25 °C, δ): 206.67(C), 168.44(C), 80.91(C), 48.04(CH<sub>2</sub>), 47.00(CH<sub>2</sub>), 26.66(CH<sub>2</sub>), 24.35(CH<sub>3</sub>), 23.26(CH<sub>2</sub>), 21.61(CH<sub>3</sub>). Mass Spectrometry: HRMS-FIA (m/z): Calcd for [C<sub>9</sub>H<sub>15</sub>NO<sub>3</sub> + H], 186.1125. Found, 186.1127.

**2-Hydroxy-2-methyl-1-phenylpropan-1-one (18)**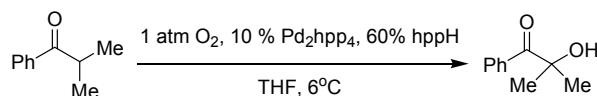

To a solution of Pd<sub>2</sub>hpp<sub>4</sub> (19 mg, 0.025 mmol, 0.050 equiv) and hppH (21 mg, 0.15 mmol, 0.30 equiv) in THF (2 mL) at 6 °C was added 2-methyl-1-phenylpropan-1-one (148 mg, 1.00 mmol, 1.00 equiv) and the reaction mixture was stirred vigorously for 12 h at 6 °C under 1 atm of oxygen. Then Pd<sub>2</sub>hpp<sub>4</sub> (19 mg, 0.025 mmol, 0.05 equiv) and hppH (21 mg, 0.15 mmol, 0.30 equiv) were added to the reaction mixture and stirred for 12 h at 6 °C under 1 atm of oxygen. Solvent was removed *in vacuo* and the residue was purified by chromatography on silica gel eluting with hexanes / EtOAc (4:1) to afford 131 mg of compound **18** as a colorless oil (80 % yield).

R<sub>f</sub> = 0.25 (EtOAc : hexanes = 1 : 4). NMR Spectroscopy: <sup>1</sup>H NMR (500 MHz, CDCl<sub>3</sub>, 25 °C, δ): 8.00 (d, *J* = 7.5 Hz, 1 H), 7.57 (t, *J* = 7.5 Hz, 1 H), 7.47 (t, *J* = 7.5 Hz, 1 H), 4.07 (s, 1 H), 1.64 (s, 3 H). <sup>13</sup>C NMR (125 MHz, CDCl<sub>3</sub>, 25 °C, δ): 204.76(C), 133.74(C), 132.96(CH), 129.61(CH), 128.45(CH), 76.24(C), 28.42(CH<sub>3</sub>). Mass Spectrometry: HRMS-FIA (*m/z*): Calcd for [C<sub>10</sub>H<sub>12</sub>O<sub>2</sub> + Na], 187.0729. Found, 187.0712.

### 2-Benzyl-2-hydroxycyclohexanone (19)

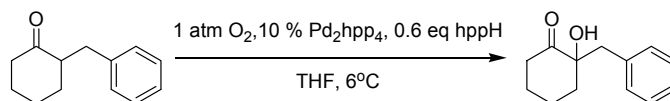

To a solution of Pd<sub>2</sub>hpp<sub>4</sub> (19 mg, 0.025 mmol, 0.050 equiv) and hppH (21 mg, 0.15 mmol, 0.30 equiv) in THF (2 mL) at 6 °C was added 2-benzylcyclohexanone (188 mg, 1.00 mmol, 1.00 equiv) and the reaction mixture was stirred vigorously for 12 h at 6 °C under 1 atm of oxygen. Then Pd<sub>2</sub>hpp<sub>4</sub> (19 mg, 0.025 mmol, 0.050 equiv) and hppH (21 mg, 0.15 mmol, 0.30 equiv) were added to the reaction mixture and stirred for 12 h at 6°C under 1 atm of oxygen. Solvent was removed *in vacuo* and the residue was purified by chromatography on silica gel eluting with hexanes / EtOAc (6:1) to afford 138 mg of compound **19** as a white solid (68 % yield).

R<sub>f</sub> = 0.20 (EtOAc : Hexanes = 1 : 6). NMR Spectroscopy: <sup>1</sup>H NMR (500 MHz, CDCl<sub>3</sub>, 25 °C, δ): 7.28–7.19 (m, 5 H), 3.85 (s, 1 H), 3.14 (d, *J* = 14 Hz, 1 H), 2.98 (d, *J* = 14 Hz, 1 H), 2.73–2.66 (td, *J* = 14 Hz, *J* = 6 Hz, 1 H), 2.56–2.53 (m, 1 H), 2.23–2.16 (m, 2 H), 1.92–1.84 (m, 2 H), 1.75–1.63 (m, 2 H). <sup>13</sup>C NMR (125 MHz, CDCl<sub>3</sub>, 25 °C, δ): 213.13(C), 135.26(C), 130.00(CH), 128.15(CH), 126.88(CH), 79.20(C), 43.21(CH<sub>2</sub>), 40.32(CH<sub>2</sub>), 38.51(CH<sub>2</sub>), 27.91(CH<sub>2</sub>), 22.71(CH<sub>2</sub>). Mass Spectrometry: HRMS-FIA (*m/z*): Calcd for [C<sub>13</sub>H<sub>16</sub>O<sub>2</sub> + Na], 227.1043. Found, 227.1039

### (1-Hydroxycyclopentyl)(phenyl)methanone (20)

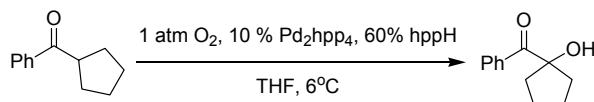

To a solution of Pd<sub>2</sub>hpp<sub>4</sub> (19 mg, 0.025 mmol, 0.050 equiv) and hppH (21 mg, 0.15 mmol, 0.30 equiv) in THF (5 mL) at 6 °C was added cyclopentyl(phenyl)methanone (87 mg, 0.50 mmol, 1.0 equiv) and the reaction mixture was stirred vigorously for 12 h at 6°C under 1 atm of oxygen.

Then Pd<sub>2</sub>hpp<sub>4</sub> (19 mg, 0.025 mmol, 0.050 equiv) and hppH (21 mg, 0.15 mmol, 0.30 equiv) were added to the reaction mixture and stirred for 12 h at 6 °C under 1 atm of oxygen. Solvent was removed *in vacuo* and the residue was purified by chromatography on silica gel eluting with hexanes / EtOAc (4:1) to afford 57 mg of compound **20** as a colorless oil (60 % yield).

$R_f = 0.50$  (EtOAc : Hexanes = 1 : 4). NMR Spectroscopy: <sup>1</sup>H NMR (500 MHz, CDCl<sub>3</sub>, 25 °C,  $\delta$ ): 7.99–7.97 (m, 2 H), 7.57–7.47 (m, 3 H), 3.78 (s, 1 H), 2.41–2.35 (m, 2 H), 2.05–2.02 (m, 2 H), 1.94–1.90 (m, 4 H), . <sup>13</sup>C NMR (125 MHz, CDCl<sub>3</sub>, 25 °C,  $\delta$ ): 203.77(C), 133.86(C), 132.80(CH), 129.55(CH), 128.29(CH), 87.09(C), 40.87(CH<sub>2</sub>), 25.51(CH<sub>2</sub>). Mass Spectrometry: HRMS-FIA (m/z): Calcd for [C<sub>12</sub>H<sub>14</sub>O<sub>2</sub> + Na], 213.0886. Found, 213.0875.

### *tert*-Butyl 3-(2-hydroxy-2-methyl-3-oxobutanoyl)-1*H*-indole-1-carboxylate (**21**)

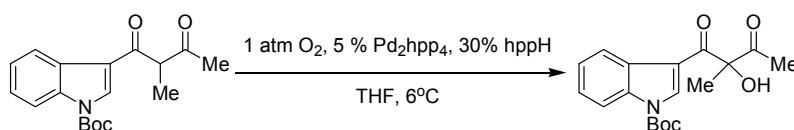

In THF: To a solution of Pd<sub>2</sub>hpp<sub>4</sub> (8 mg, 0.01 mmol, 0.05 equiv) and hppH (8.5 mg, 0.060 mmol, 0.30 equiv) in THF (2 mL) at 6 °C was added **S1** (63 mg, 0.20 mmol, 1.0 equiv) and the reaction mixture was stirred vigorously for 12 h at 6 °C under 1 atm of oxygen. Solvent was removed *in vacuo* and the residue was purified by chromatography on silica gel eluting with CH<sub>2</sub>Cl<sub>2</sub> / MeOH (10:1) to afford 46 mg of compound **21** as a white solid (70 % yield).

In toluene: To a solution of Pd<sub>2</sub>hpp<sub>4</sub> (8 mg, 0.01 mmol, 0.05 equiv) and hppH (8.5 mg, 0.060 mmol, 0.30 equiv) in toluene (2 mL) at 6 °C was added **S1** (63 mg, 0.20 mmol, 1.0 equiv) and the reaction mixture was stirred vigorously for 12 h at 6 °C under 1 atm of oxygen. Solvent was removed *in vacuo* and the residue was purified by chromatography on silica gel eluting with CH<sub>2</sub>Cl<sub>2</sub> / MeOH (10:1) to afford 40 mg of compound **21** as a white solid (60 % yield).

$R_f = 0.30$  (CH<sub>2</sub>Cl<sub>2</sub> : MeOH = 10 : 1). NMR Spectroscopy: <sup>1</sup>H NMR (500 MHz, CDCl<sub>3</sub>, 25 °C,  $\delta$ ): 8.58 (d,  $J = 2$  Hz, 1H), 8.41–8.38 (m, 1 H), 8.15–8.13 (m, 1 H), 7.41–7.35 (m, 2 H), 5.18 (s, 1 H), 2.26 (s, 1 H), 1.75 (s, 3 H), 1.71 (s, 3 H). <sup>13</sup>C NMR (125 MHz, CDCl<sub>3</sub>, 25 °C,  $\delta$ ): 207.93(C), 193.29(C), 148.71(C), 135.37(CH), 134.83(C), 128.16(C), 125.75(CH), 124.72(CH), 122.59(CH), 114.96(CH), 114.94(C), 85.58(C), 85.75(C), 28.02(CH<sub>3</sub>), 24.74(CH<sub>3</sub>), 24.59(CH<sub>3</sub>). Mass Spectrometry: HRMS-FIA (m/z): Calcd for [C<sub>18</sub>H<sub>21</sub>NO<sub>5</sub> + H], 332.1493. Found, 332.1496.

### 3,4-dihydro-2-hydroxy-2-(pent-4-enyl)naphthalen-1(2*H*)-one (**22**)

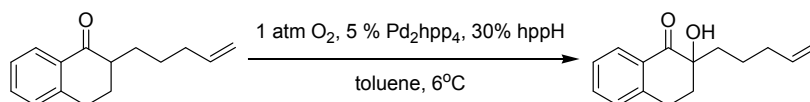

To a solution of Pd<sub>2</sub>hpp<sub>4</sub> (19 mg, 0.025 mmol, 0.050 equiv) and hppH (21 mg, 0.15 mmol, 0.30 equiv) in toluene (5 mL) at 6 °C was added 2-allyl-1-tetralone (107 mg, 0.50 mmol, 1.0 equiv)

and the reaction mixture was stirred vigorously for 12 h at 6 °C under 1 atm of oxygen. Solvent was removed *in vacuo* and the residue was purified by chromatography on silica gel eluting with hexanes / EtOAc (12:1) to afford 82 mg of compound **22** as a colorless oil (71 % yield).

$R_f$  = 0.30 (hexanes : EtOAc = 8 : 1). NMR Spectroscopy:  $^1\text{H}$  NMR (500 MHz,  $\text{CDCl}_3$ , 25 °C,  $\delta$ ): 8.01 (d,  $J$  = 7.5 Hz, 1 H), 7.52 (t,  $J$  = 7.5 Hz, 1 H), 7.34 (t,  $J$  = 7.5 Hz, 1 H), 7.25 (d,  $J$  = 7.5 Hz, 1 H), 5.78–5.69 (m, 1 H), 4.95 (d,  $J$  = 18 Hz,  $J$  = 1 Hz, 1 H), 4.91 (d,  $J$  = 10 Hz, 1 H), 3.82 (s, 1 H), 3.08 (ddd,  $J$  = 17.5 Hz,  $J$  = 12.5 Hz,  $J$  = 5 Hz, 1 H), 3.01–2.97 (m, 1 H), 2.36–2.32 (m, 1 H), 2.15 (dt,  $J$  = 13 Hz,  $J$  = 5.5 Hz, 1 H), 2.02–2.00 (m, 2 H), 1.72–1.65 (m, 1 H), 1.61–1.54 (m, 2 H), 1.46–1.40 (m, 1 H).  $^{13}\text{C}$  NMR (125 MHz,  $\text{CDCl}_3$ , 25 °C,  $\delta$ ): 201.82(C), 143.36(C), 138.16(CH), 133.92(CH), 130.17(C), 128.94(CH), 127.89(CH), 126.82(CH), 114.80( $\text{CH}_2$ ), 75.57(C), 34.85( $\text{CH}_2$ ), 33.81( $\text{CH}_2$ ), 33.66( $\text{CH}_2$ ), 26.47( $\text{CH}_2$ ), 22.13( $\text{CH}_2$ ). Mass Spectrometry: HRMS-FIA ( $m/z$ ): Calcd for [ $\text{C}_{15}\text{H}_{18}\text{O}_2$  + H], 231.1380. Found, 231.1382.

**5-((3a*R*,6*S*,6a*S*)-Hexahydro-2-oxo-1*H*-thieno[3,4-*d*]imidazol-6-yl)pentyl 2-hydroxy-2,2-diphenylacetate (**23**)**

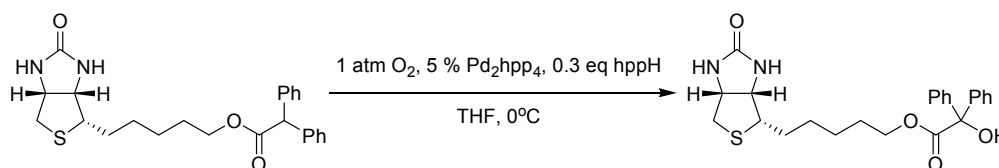

To a solution of  $\text{Pd}_2\text{hpp}_4$  (8 mg, 0.01 mmol, 0.05 equiv) and  $\text{hppH}$  (8.5 mg, 0.060 mmol, 0.30 equiv) in THF (2 mL) at 6 °C was added **S2** (85 mg, 0.20 mmol, 1.0 equiv) and the reaction mixture was stirred vigorously for 12 h at 6 °C under 1 atm of oxygen. Solvent was removed *in vacuo* and the residue was purified by chromatography on silica gel eluting with  $\text{CH}_2\text{Cl}_2$  / MeOH (10:1) to afford 82 mg of compound **23** as a white solid (93 % yield).

$R_f$  = 0.25 ( $\text{CH}_2\text{Cl}_2$  : MeOH = 10 : 1). NMR Spectroscopy:  $^1\text{H}$  NMR (500 MHz,  $\text{CDCl}_3$ , 25 °C,  $\delta$ ): 7.43–7.41 (m, 2 H), 7.35–7.30 (m, 3 H), 5.89 (s, 1 H), 5.29 (s, 1 H), 4.54 (s, 1 H), 4.43 (t,  $J$  = 0.5 Hz, 1 H), 4.26–4.19 (m, 3 H), 3.04 (q,  $J$  = 0.5 Hz, 1H), 2.85 (dd,  $J$  = 1.5 Hz,  $J$  = 0.5 Hz, 1H), 2.65 (d,  $J$  = 1.5 Hz, 1H), 1.67–1.51 (m, 4 H), 1.36–1.19 (m, 4 H).  $^{13}\text{C}$  NMR (125 MHz,  $\text{CDCl}_3$ , 25 °C,  $\delta$ ): 174.45(C), 163.63(C), 142.10(C), 128.03(CH), 127.95(CH), 127.26(CH), 81.05(C), 66.61( $\text{CH}_2$ ), 61.87(CH), 60.05(CH), 55.46(CH), 40.49( $\text{CH}_2$ ), 28.37( $\text{CH}_2$ ), 28.34( $\text{CH}_2$ ), 28.04( $\text{CH}_2$ ), 25.57( $\text{CH}_2$ ). Mass Spectrometry: HRMS-FIA ( $m/z$ ): Calcd for [ $\text{C}_{24}\text{H}_{28}\text{N}_2\text{O}_4\text{S}$  + Na], 463.1662. Found, 463.1662.

**Pd<sub>2</sub>hpp<sub>4</sub>Cl<sub>2</sub> (S3)**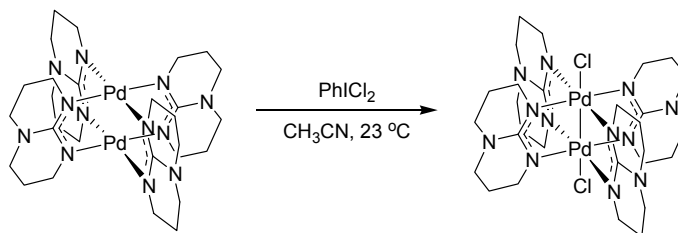

To a suspension of Pd<sub>2</sub>hpp<sub>4</sub> (535 mg, 0.700 mmol, 1.00 equiv) in acetonitrile (10 mL) at 23 °C was added PhICl<sub>2</sub> (192 mg, 0.700 mmol, 1.00 equiv) and the reaction was stirred for 1 h at 23 °C. Dark green precipitate from the reaction mixture was filtered over a glass fiber filter paper and the solid residue was triturated with benzene (5 mL). The suspension was filtered over a glass fiber filter paper, the dark green residue collected, and dissolved in CH<sub>2</sub>Cl<sub>2</sub>. Solvent was removed in vacuo to afford 230 mg of compound S3 as a dark green solid (27 % yield). A crystal of S3 was obtained by layering pentane onto a solution of S3 in CH<sub>2</sub>Cl<sub>2</sub> at 0 °C and the unit cell parameter as determined by X-ray diffraction matched the reported data.<sup>3</sup>

NMR Spectroscopy: <sup>1</sup>H NMR (500 MHz, CD<sub>2</sub>Cl<sub>2</sub> –50 °C, δ): 3.90–3.84 (m, 8 H), 3.12–3.05 (m, 16 H), 2.93–2.88 (m, 8 H), 1.88–1.81 (m, 8 H), 1.72–1.65 (m, 8 H). <sup>13</sup>C NMR (1.25 MHz, CD<sub>2</sub>Cl<sub>2</sub>, 25 °C, δ): 165.06, 48.83, 48.60, 25.98. UV-VIS Spectroscopy (CH<sub>2</sub>Cl<sub>2</sub>, 22 °C): 648 nm (ε = 1.08 × 10<sup>2</sup> M<sup>-1</sup> cm<sup>-1</sup>); 324 nm (ε = 3.30 × 10<sup>3</sup> M<sup>-1</sup> cm<sup>-1</sup>).

**Pd<sub>2</sub>hpp<sub>4</sub>(OBz)<sub>2</sub> (24) (CCDC 784627)**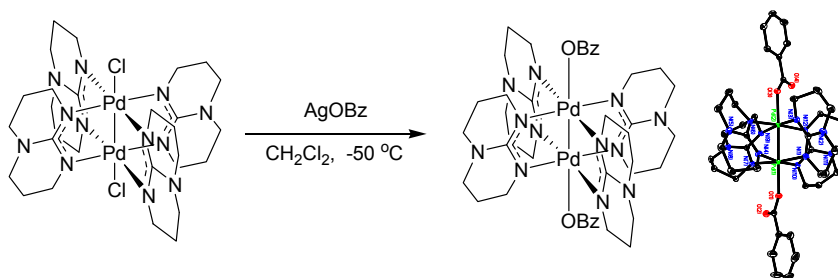

The following experiment was carried out in a nitrogen filled drybox: To a suspension of AgOBz (205 mg, 0.900 mmol, 5.00 equiv) in CH<sub>2</sub>Cl<sub>2</sub> (5 mL) at –50 °C was added S3 (150 mg, 0.180 mmol, 1.00 equiv) and the reaction was stirred for 2 h at –50 °C. The reaction mixture was filtered through a glass fiber filter paper at –50 °C. The filtrate was concentrated in vacuo at –50 °C to afford 150 mg of compound 24 as a dark green solid (83 % yield). The compound was crystallized as dark green needles by diffusing pentane into a dichloromethane solution of 24 at –50 °C for 72 h. For X-ray crystallographic data of 24 see x-ray section.

NMR Spectroscopy: <sup>1</sup>H NMR (500 MHz, CDCl<sub>3</sub> –50 °C, δ): 8.03–8.01 (m, 4 H), 7.37–7.33 (m, 6 H), 3.41 (br, 16 H), 3.02 (br, 16 H), 1.80 (br, 16H). <sup>13</sup>C NMR (125 MHz, CDCl<sub>3</sub>, –50 °C, δ): 168.66, 162.76, 138.32, 129.53, 129.23, 127.54, 48.40, 46.46, 24.61.

**Pd<sub>2</sub>hpp<sub>4</sub>(OCO<sup>n</sup>Pr)<sub>2</sub> (S4)**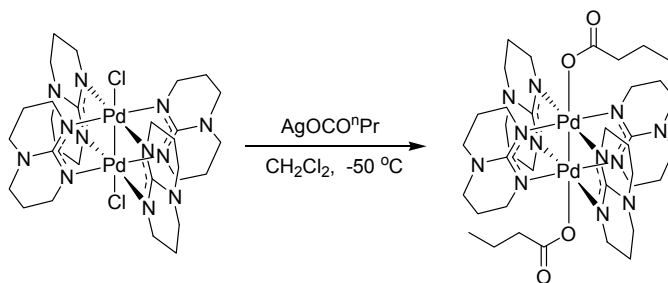

The following experiment was carried out in a nitrogen filled drybox: To a suspension of AgOCO<sup>n</sup>Pr (47 mg, 0.24 mmol, 5.0 equiv) in CH<sub>2</sub>Cl<sub>2</sub> (6 mL) at -50 °C was added **S3** (40 mg, 0.050 mmol, 1.0 equiv) and the reaction mixture was stirred for 2 h at -50 °C. The reaction mixture was filtered through a glass fiber filter paper at -50 °C. The residue was concentrated *in vacuo* at -50 °C to afford 33 mg of compound **S4** as a dark green solid (70 % yield).

NMR Spectroscopy: <sup>1</sup>H NMR (500 MHz, CDCl<sub>3</sub>, -50 °C, δ): 3.29 (br, 16 H), 3.00–2.97 (m, 16 H), 2.13 (t, *J* = 7 Hz, 4 H), 1.76–1.72 (m, 16 H), 1.58–1.51 (m, 4 H), 0.84 (t, *J* = 7 Hz, 6 H), <sup>13</sup>C NMR (125 MHz, CDCl<sub>3</sub>, -50 °C, δ): 176.69, 162.68, 48.43, 46.01, 41.62, 24.43, 19.99, 14.09.

**2-Hydroxy-2-phenyl-2H-indene-1,3-dione (S6)**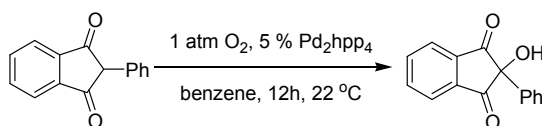

To a solution of Pd<sub>2</sub>hpp<sub>4</sub> (19 mg, 0.025 mmol, 0.050 equiv) benzene (5 mL) at 22 °C was added 2-phenyl-2H-indene-1,3-dione (111 mg, 0.500 mmol, 1.00 equiv) and the reaction mixture was stirred vigorously for 12 h at 22 °C under 1 atm of oxygen. Solvent was removed *in vacuo* and the residue was purified by chromatography on silica gel eluting with CH<sub>2</sub>Cl<sub>2</sub> / MeOH (20:1) to afford 106 mg of compound **23** as a yellow solid (90 % yield).

R<sub>f</sub> = 0.30 (CH<sub>2</sub>Cl<sub>2</sub> : MeOH = 20 : 1). NMR Spectroscopy: <sup>1</sup>H NMR (500 MHz, CDCl<sub>3</sub>, 25 °C, δ): 8.08 (dd, *J* = 6 Hz, *J* = 3 Hz, 2 H), 7.96–7.92 (m, 2 H), 7.42–7.39 (m, 2 H), 7.35–7.31 (m, 3 H), 3.30 (s, 1 H). <sup>13</sup>C NMR (125 MHz, CDCl<sub>3</sub>, 25 °C, δ): 197.88(C), 141.04(C), 136.65(CH), 136.50(C), 128.88(CH), 128.78(CH), 126.17(CH), 124.24(CH), 79.45(C). Mass Spectrometry: HRMS-FIA (*m/z*): Calcd for [C<sub>15</sub>H<sub>10</sub>O<sub>3</sub> + Na], 261.0522. Found, 261.0519.

**2-Hydroxy-2-phenyl-2H-indene-1,3-dione (S7)**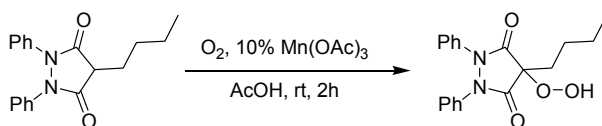

A mixture of 4-butyl-1,2-diphenylpyrazolidine-3,5-dione (1 mmol) and manganese(III) acetate dihydrate (0.1 mmol) in glacial acetic acid (30 mL) was stirred at 23 °C for 2 h in air, and then the reaction was quenched by adding water (25 mL) to the mixture. The aqueous reaction mixture was extracted three times with dichloromethane (30 mL) and the combined extract was washed with water, a saturated aqueous solution of sodium hydrogencarbonate, dried over anhydrous sodium sulfate, and then concentrated to dryness. The residue was purified by recrystallization from diethyl ether-hexane to afford 300 mg of compound **S7** as a white solid (88 % yield).<sup>2</sup>

NMR Spectroscopy: <sup>1</sup>H NMR (500 MHz, CDCl<sub>3</sub>, 25 °C, δ): 9.02 (br, 1 H), 7.36–7.31 (m, 6 H), 7.25–7.20 (m, 4 H), 2.01–1.98 (m, 2 H), 1.44–1.32 (m, 4 H), 0.88 (t, *J* = 7.5 Hz, 3 H). <sup>13</sup>C NMR (125 MHz, CDCl<sub>3</sub>, 25 °C, δ): 168.72(C), 134.66(C), 128.90(CH), 127.37(CH), 123.23(CH), 85.02(C), 31.76(CH<sub>2</sub>), 24.11(CH<sub>2</sub>), 22.32(CH<sub>2</sub>), 13.34(CH<sub>3</sub>). Mass Spectrometry: HRMS-FIA (m/z): Calcd for [C<sub>19</sub>H<sub>20</sub>N<sub>2</sub>O<sub>4</sub> + H], 341.1501. Found, 341.1489.

#### 4-Butyl-4-hydroxy-1,2-diphenylpyrazolidine-3,5-dione (**S8**)

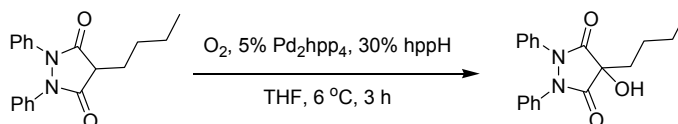

To a solution of Pd<sub>2</sub>hpp<sub>4</sub> (19 mg, 0.025 mmol, 0.050 equiv) and hppH (21 mg, 0.15 mmol, 0.30 equiv) in THF (6 mL) at 22 °C was added 2-phenyl-2H-indene-1,3-dione (154 mg, 0.500 mmol, 1.00 equiv) and the reaction mixture was stirred vigorously for 12 h at 6 °C under 1 atm of oxygen. Solvent was removed *in vacuo* and the residue was purified by chromatography on silica gel eluting with hexanes / EtOAc (2:1) to afford 75 mg of compound **S8** as a yellow solid (46 % yield).

R<sub>f</sub> = 0.30 (hexanes : EtOAc = 2 : 1). NMR Spectroscopy: <sup>1</sup>H NMR (500 MHz, CDCl<sub>3</sub>, 25 °C, δ): 7.33–7.28 (m, 8 H), 7.21–7.17 (m, 2 H), 3.83 (br, 1H), 2.07–2.03 (m, 2 H), 1.41–1.25 (m, 4 H), 0.87 (t, *J* = 7 Hz, 3 H). <sup>13</sup>C NMR (125 MHz, CDCl<sub>3</sub>, 25 °C, δ): 170.36(C), 134.96(C), 129.03(CH), 127.16(CH), 122.67(CH), 74.07(C), 37.36(CH<sub>2</sub>), 24.53(CH<sub>2</sub>), 22.51(CH<sub>2</sub>), 13.64(CH<sub>3</sub>). Mass Spectrometry: HRMS-FIA (m/z): Calcd for [C<sub>19</sub>H<sub>20</sub>N<sub>2</sub>O<sub>3</sub> + H], 325.1552. Found, 325.1535

### C–H oxidation of acidic methylene groups

Oxidation of unsubstituted malonates and 1,3-diketones with **1** afforded mixtures of products and recovered starting materials. The only case in which we were able to isolate the α-oxidized product was the oxidation of benzyl phenylketone to benzil:

#### Benzil (**S5**)

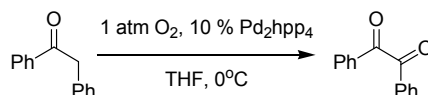



To a solution of Pd<sub>2</sub>hpp<sub>4</sub> (77 mg, 0.10 mmol, 0.10 equiv) at 6 °C was added benzyl phenylketone (196 mg, 1.00 mmol, 1.00 equiv) and the reaction mixture was stirred for 12 h at 6 °C under 1 atm of oxygen. Solvent was removed *in vacuo* and the residue was purified by chromatography on silica gel eluting with hexanes / EtOAc (4:1) to afford 140 mg of **S5** as a pale yellow solid (67 % yield).

R<sub>f</sub> = 0.25 (hexanes : EtOAc = 4 : 1). NMR Spectroscopy: <sup>1</sup>H NMR (500 MHz, CDCl<sub>3</sub>, 25 °C, δ): 7.98 (d, *J* = 7.5 Hz, 8 H), 7.67 (t, *J* = 7.5 Hz, 4 H), 7.52 (t, *J* = 7.5 Hz, 8 H). <sup>13</sup>C NMR (125 MHz, CDCl<sub>3</sub>, 25 °C, δ): 194.52, 134.83, 132.92, 129.82, 128.96.

## Oxygen uptake experiment

The oxygen uptake experiments of Pd<sub>2</sub>hpp<sub>4</sub> catalyzed α-hydroxylation of 2-acetyl-3,4-dihydronaphthalen-1(2*H*)-one (**S9**) were done on 1, 0.5, 0.3 and 0.15 mmol of the starting material. (Table S4) The following procedure describes experiment done on 0.5 mmol scale:

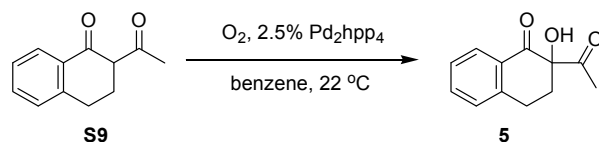

To a 100 mL Schlenk tube equipped with magnetic stirring bar at 22 °C was added a solution of **1** (9.6 mg, 0.013 mmol, 0.025 equiv) in benzene (5 mL). The solution was stirred under 1 atm of O<sub>2</sub> for 10 min after which a solution of **S9** (94 mg, 0.50 mmol, 1.0 equiv) in benzene (1 mL) was added. The Schlenk tube was closed immediately with a threaded Teflon stopcock and the reaction mixture was stirred for 12 hr at 22 °C. The sidearm of the Schlenk tube was connected to the apparatus shown in following figure and the oil levels at both ends were equilibrated.<sup>5</sup> The stopcock was marginally opened to allow a steady change in oil levels and the movable arm was adjusted to regulate atmospheric pressure inside the Schlenk tube. O<sub>2</sub> uptake readings were completed by comparing oil levels before and after the opening of the Schlenk tube.

<sup>5</sup> Appleton, T. G. *J. Chem. Educ.* **1977**, *54*, 443.

**Figure S1. Oxygen uptake measurement setup**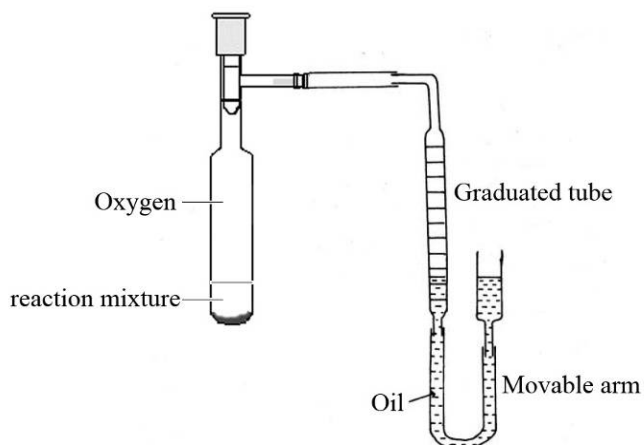**Table S4. Result of Oxygen uptake experiments**

| Entry | Reaction scale<br>(mmol of SM) | Isolated product<br>(mg) | Yield (%) | O <sub>2</sub> uptake<br>(mL) | Equiv of O <sub>2</sub> |
|-------|--------------------------------|--------------------------|-----------|-------------------------------|-------------------------|
| 1     | 1                              | 140                      | 69        | 10                            | 0.59                    |
| 2     | 1                              | 150                      | 74        | 9.6                           | 0.54                    |
| 3     | 1                              | 130                      | 64        | 8.2                           | 0.53                    |
| 4     | 1                              | 130                      | 64        | 8.5                           | 0.54                    |
| 5     | 0.5                            | 82                       | 80        | 4.8                           | 0.50                    |
| 6     | 0.5                            | 82                       | 80        | 4.7                           | 0.48                    |
| 7     | 0.5                            | 80                       | 78        | 5.6                           | 0.59                    |
| 8     | 0.5                            | 75                       | 74        | 4.4                           | 0.49                    |
| 9     | 0.3                            | 56                       | 90        | 3.6                           | 0.56                    |
| 10    | 0.3                            | 51                       | 83        | 3.5                           | 0.56                    |
| 11    | 0.3                            | 48                       | 80        | 3.0                           | 0.50                    |
| 12    | 0.3                            | 56                       | 90        | 3.4                           | 0.52                    |
| 13    | 0.15                           | 27                       | 87        | 1.6                           | 0.51                    |
| 14    | 0.15                           | 29                       | 93        | 1.6                           | 0.47                    |
| 15    | 0.15                           | 27                       | 87        | 1.5                           | 0.48                    |

The correlation of equivalent of O<sub>2</sub> consumed versus reaction scale (in mmol of isolated product) is shown in following plot.

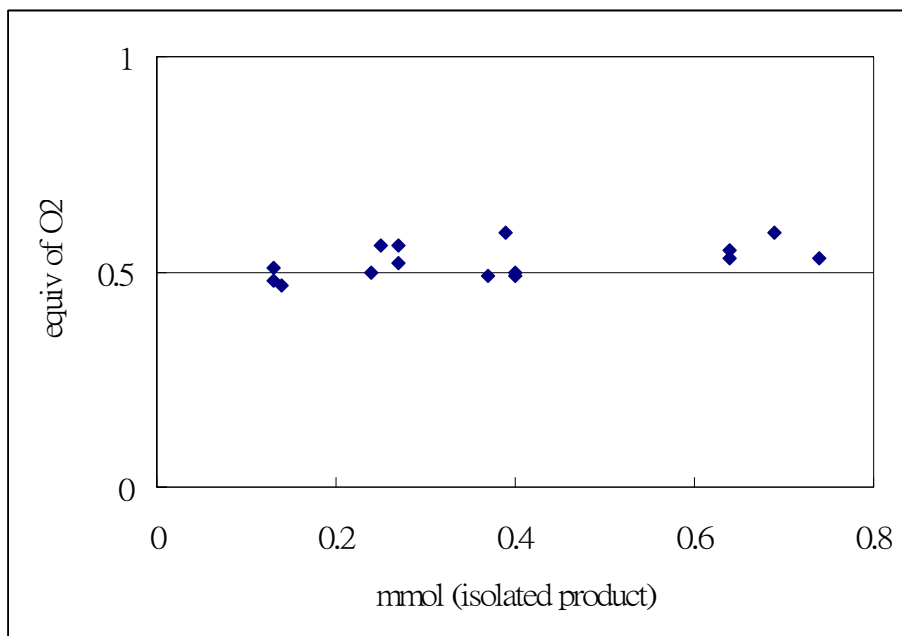

### <sup>18</sup>O isotope experiment

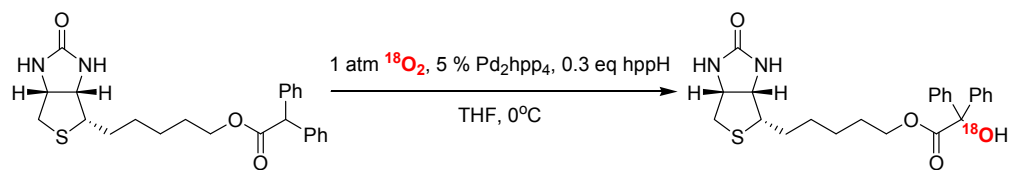

$^{18}\text{O}$  was purchased from Cambridge Isotope with 98 % isotopic purity. The experiment was carried out according to the procedure reported for the oxidation of **S2** to **23** under 1 atm of  $^{18}\text{O}_2$ . The percentage of  $^{18}\text{O}$  enrichment was examined by mass spectrometry as shown in following figure. The data calculated for 97 %  $^{18}\text{O}$  enrichment of **23**.

Figure S2. Mass spectrometry measurement of  $^{18}\text{O}$  enrichment 23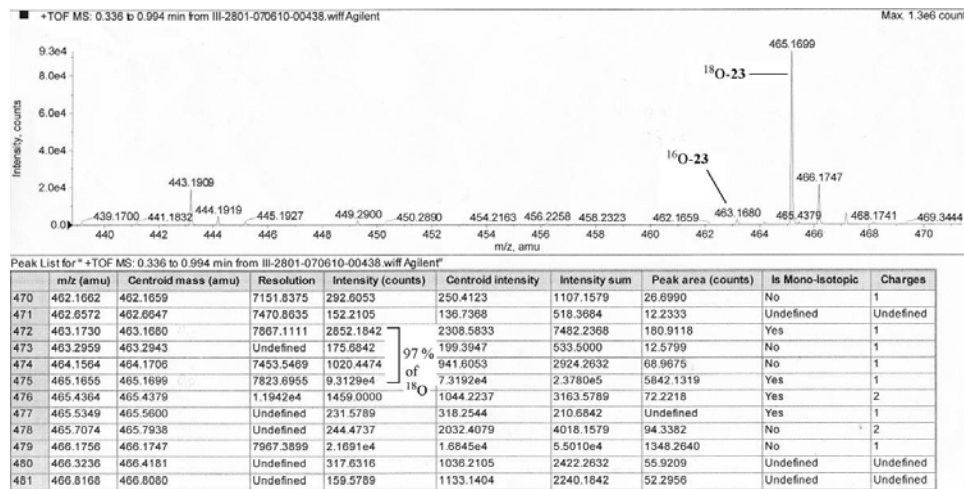

## Experiments with mononuclear Palladium complexes

**S11**,  $\text{PdCl}_2(\text{hppH})_4$ ,<sup>6</sup> and **S12**,  $\text{Pd}(\text{TPA})_2$ <sup>7</sup> were tested in following reaction for their reactivity in the  $\alpha$ -hydroxylation reaction of **S9**.  $\text{PdCl}_2(\text{hppH})_2$  is a known Pd complex with two hppHs as L-type ligands.  $\text{Pd}(\text{TPA})_2$  is a mononuclear complex featuring two chelating amidates. Starting material was recovered in both reactions with no product formation.

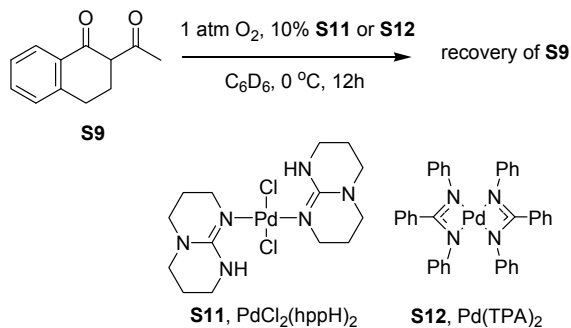

<sup>6</sup> Oakley, S. H.; Coles, M. P.; Hitchcock P. B. *Inorg. Chem.* **2004**, *43*, 7564.

<sup>7</sup> Berry, J. F.; Cotton, F. A.; Ibragimov, S. A.; Murillo, C. A.; Wang X. *Inorg. Chem.* **2005**, *44*, 6129.

## UV-vis Data

Figure S3. UV-VIS Spectrum of Pd<sub>2</sub>hpp<sub>4</sub>Cl<sub>2</sub> (S3) in CH<sub>2</sub>Cl<sub>2</sub> at 22 °C

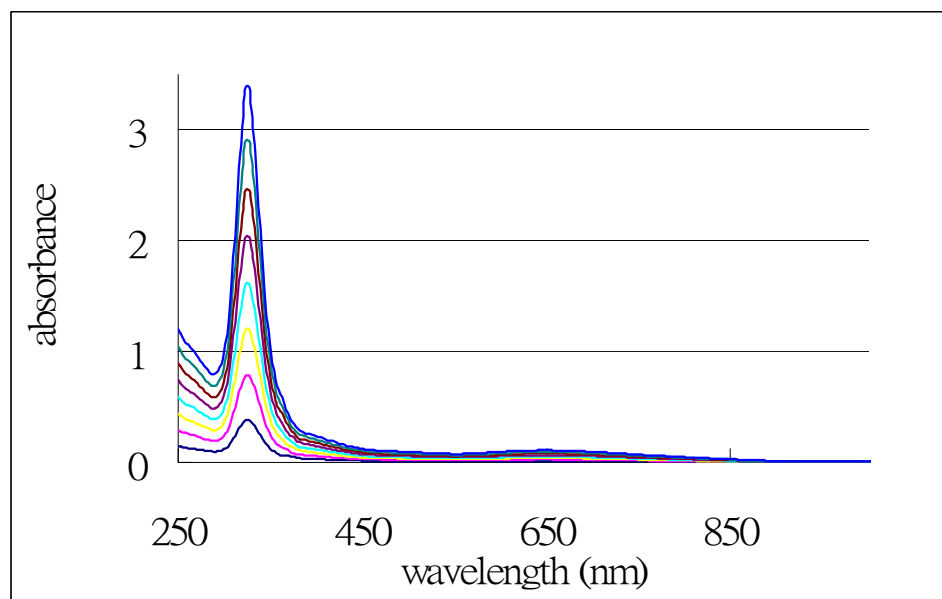

Figure S4. Molar Absorptivity Determination at 324nm

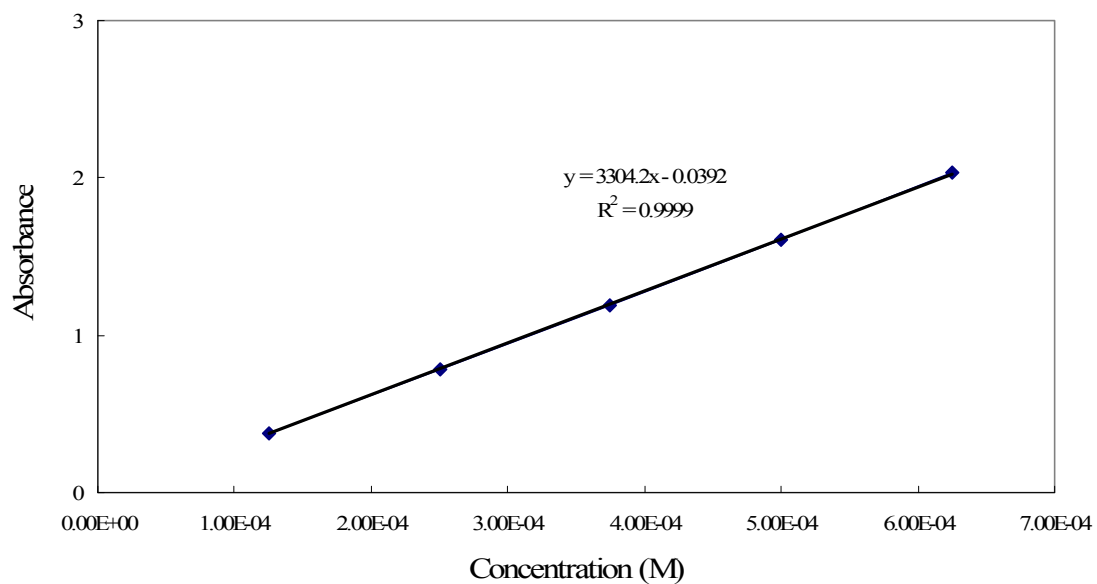

**Figure S5. Molar Absorptivity Determination at 648nm**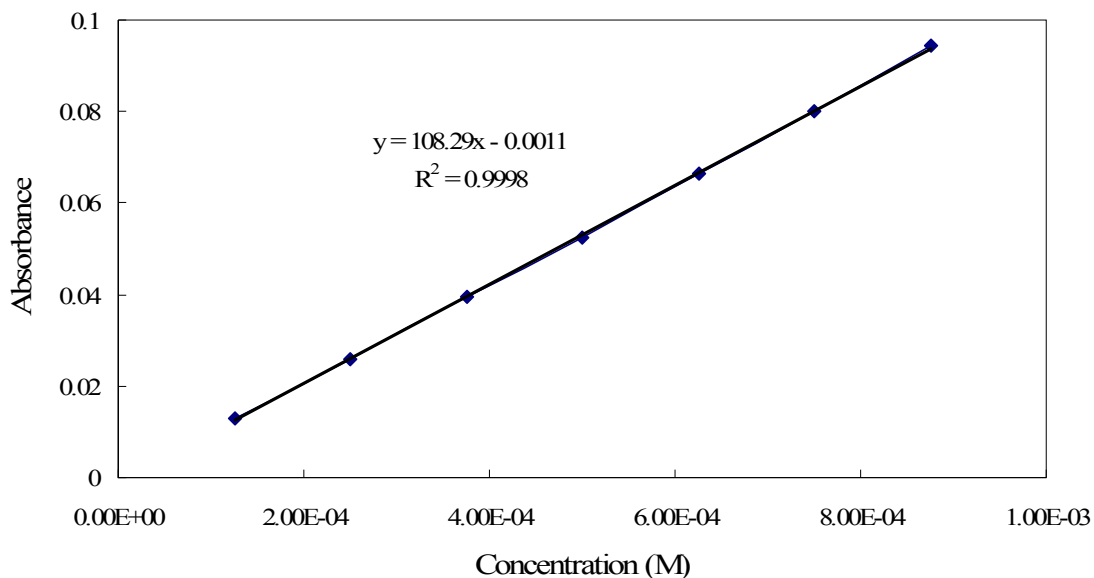**Figure S6. UV-VIS Spectrum comparison of 1-catalyzed  $\alpha$ -hydroxylation of 3 (1) with dimeric Pd(III) complexes derived from 1**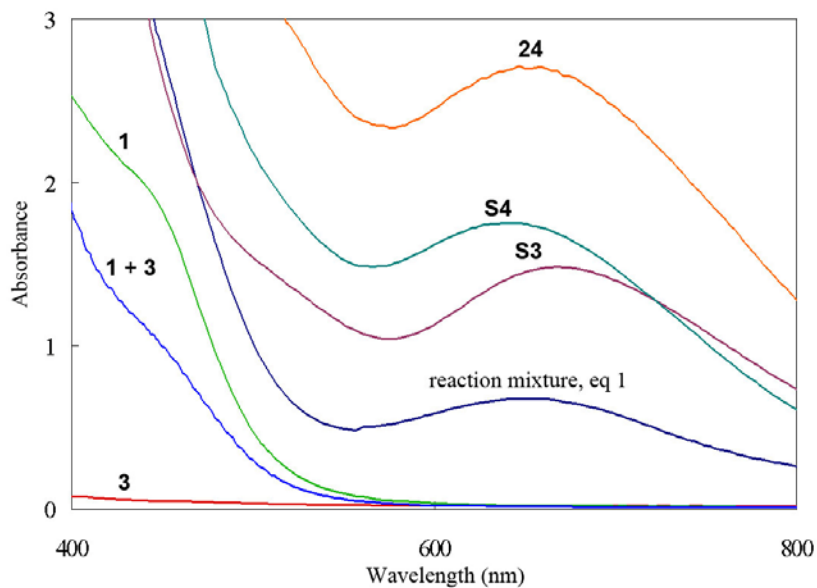

UV absorption spectrum of **1**, **3**, **24**, **S3**, **S4** and **1+3** in THF were measured in following concentration and temperature: **1**: 0.005M at 0 °C; **3**: 0.03M at 0 °C; **24**: 0.001M at -78 °C; **S3**: 0.001M at 0 °C; **S4**: 0.001M at -78 °C; **1 + 3**: 0.003M of **1** and 0.03M of **3** (degassed) at 0 °C.

UV absorption measurement of reaction mixture of eq 1:

To a 0.03M solution of **3** (2mL) in THF at 0 °C in a cuvette was added 0.6 mL of 0.005M THF

solution of **1** at 0 °C. The solution was bubbled with O<sub>2</sub> for 5 sec and the UV absorption was measured.

**Figure S7. UV-VIS Spectrum comparison of 1-catalyzed  $\alpha$ -hydroxylation of S9 (S1) with 24**

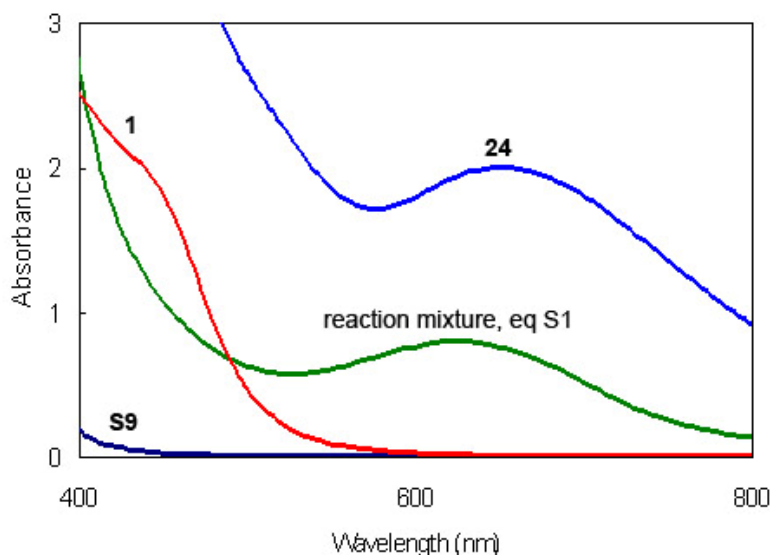

UV absorption measurement of reaction mixture of eq S1:

To a 0.02M solution of **S9** (1.8 mL) in benzene at 22 °C in a cuvette was added 0.2 mL of 0.01M benzene solution of **1** at 22 °C. The solution was bubbled with O<sub>2</sub> for 5 sec and the UV-vis absorption was measured.

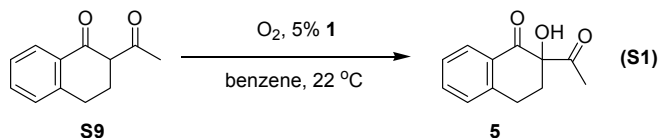

## DFT Computations

Density functional theory (DFT) calculations were performed using Gaussian09<sup>8</sup> at the Odyssey

<sup>8</sup> Frisch, M. J.; Trucks, G. W.; Schlegel, H. B.; Scuseria, G. E.; Robb, M. A.; Cheeseman, J. R.; Scalmani, G.; Barone, V.; Mennucci, B.; Petersson, G. A.; Nakatsuji, H.; Caricato, M.; Li, X.; Hratchian, H. P.; Izmaylov, A. F.; Bloino, J.; Zheng, G.; Sonnenberg, J. L.; Hada, M.; Ehara, M.; Toyota, K.; Fukuda, R.; Hasegawa, J.; Ishida, M.; Nakajima, T.; Honda, Y.; Kitao, O.; Nakai, H.; Vreven, T.; J. A. Montgomery, J.; Peralta, J. E.; Ogliaro, F.; Bearpark, M.; Heyd, J. J. Brothers, E.; Kudin, K. N.; Staroverov, V. N.; Normand, J.; Raghavachari, K.; Rendell, A.; Burant, J. C.; Iyengar, S. S.; Cossi, J. M.; Rega, N.; Millam, J. M.; Klene, M.; Knox, J. E.; Cross, J. B.; Bakken, V.; Adam, C.; Jaramillo, J.; Gomperts, R.; Stratmann, R. E.; Yazyev, O.; Austin, A. J.; Cammi, R.; Pomelli, C.; Ochterski, J.

cluster at Harvard University. **S3** was used as the compound in the DFT computation due to the simpler structure compared to **24** and **S4**. All three of complexes **24**, **S3**, and **S4** display similar UV-vis absorptions at around 650 nm. Geometry optimizations were carried out using the atomic coordinates of the crystal structure of **S3**<sup>4</sup> as a starting point with the B3PW91<sup>9</sup> hybrid functional. B3LYP<sup>10</sup> and M06<sup>11</sup> hybrid functionals used the optimized structure of **S3** with B3PW91 as a starting point. The unrestricted wave function was used for the singlet ground state of **S3**. BS I includes SDD quasirelativistic pseudopotentials on Pd (28) and Cl (10) with basis sets (Pd: (8s7p6d)/[6s5p3d]<sup>12</sup>; Cl: (4s5p)/[2s3p]<sup>13</sup>) extended by polarization functions (Pd: f, 1.472<sup>14</sup>; Cl: d, 0.640<sup>15</sup>), and 6-31G(d,p)<sup>16</sup> on H, C, N. All geometry optimizations were performed using the above functionals with the BS I basis set, followed by frequency calculations on each optimized structure with corresponding functional/BS I. Time-dependent density functional theory<sup>17</sup> (TD-DFT) calculations were performed using the above functionals and BS I on the geometry optimized in vacuum by the above functionals with the BS I basis set. TD-DFT calculations were also carried out on B3P86<sup>18</sup> and mPW1PW91<sup>19</sup> functionals with the BS I basis set using the optimized structure of **S3** with B3PW91. Molecular orbitals of **S3** were generated using an isosurface value of 0.02 on the optimized structure of **S3** with B3PW91/BS I. UV-vis spectrum was simulated by GaussView5.<sup>20</sup>

---

W.; Martin, R. L.; Morokuma, K.; Zakrzewski, V. G.; Voth, G. A.; Salvador, P.; Dannenberg, J. J.; Dapprich, S.; Daniels, A. D. Farkas, O.; Foresman, J. B.; Ortiz, J. V.; Cioslowski, J.; Fox, D. J. *Gaussian 09, Revision A.02*; Gaussian, Inc.: Wallingford CT, 2009.

<sup>9</sup> (a) Becke, A. D. *J. Chem. Phys.* **1993**, *98*, 5648-5652. (b) Perdew, J. P.; Wang, Y. *Phys. Rev. B* **1992**, *45*, 13244-13249.

<sup>10</sup> Kohn, W.; Becke, A. D.; Parr, R. G., *J. Phys. Chem.* **1996**, *100*, 12974-12980.

<sup>11</sup> Zhao, Y.; Truhlar, D. G. *Acc. Chem. Res.* **2008**, *41*, 157-167.

<sup>12</sup> (a) Andrae, D.; Häussermann, U.; Dolg, M.; Stoll, H.; Preuss, H. *Theor. Chim. Acta* **1990**, *77*, 123-141. (b) Andrae, D.; Häussermann, U.; Dolg, M.; Stoll, H.; Preuss, H. *Theor. Chim. Acta* **1991**, *78*, 247-266.

<sup>13</sup> Bergner, A.; Dolg, M.; Küchle, W.; Stoll, H.; Preuss, H. *Mol. Phys.* **1993**, *30*, 1431-1441.

<sup>14</sup> Ehlers, A. W.; Böhme, M.; Dapprich, S.; Gobbi, A.; Höllwarth, A.; Jonas, V.; Köhler, K. F.; Stegmann, R.; Veldkamp, A.; Frenking, G. *Chem. Phys. Lett.* **1993**, *208*, 111-114.

<sup>15</sup> Höllwarth, A.; Böhme, M.; Dapprich, S.; Ehlers, A. W.; Gobbi, A.; Jonas, V.; Köhler, K. F.; Stegmann, R.; Veldkamp, A.; Frenking, G. *Chem. Phys. Lett.* **1993**, *208*, 237-240.

<sup>16</sup> Hariharan, P. C.; Pople, J. A. *Theor. Chim. Acta* **1973**, *28*, 213-222.

<sup>17</sup> Stratmann, R. E.; Scuseria, G. E.; Frisch, M. J. *J. Chem. Phys.* **1998**, *109*, 8218-8224.

<sup>18</sup> Perdew, J. P. *Phys. Rev. B* **1986**, *33*, 8822-8824.

<sup>19</sup> Adamo, C.; Barone, V. *J. Chem. Phys.* **1998**, *108*, 664-675.

<sup>20</sup> Dennington, R., II; Keith, T. A.; Millam, J. M. *GaussView*, Version 5.0.8; Semichem, Inc.



**Table S5. The optimized structure of S3 with B3PW91/BS I and cartesian coordinates (Å)**

|                                                                                   |               |               |               |   |               |               |               |
|-----------------------------------------------------------------------------------|---------------|---------------|---------------|---|---------------|---------------|---------------|
| 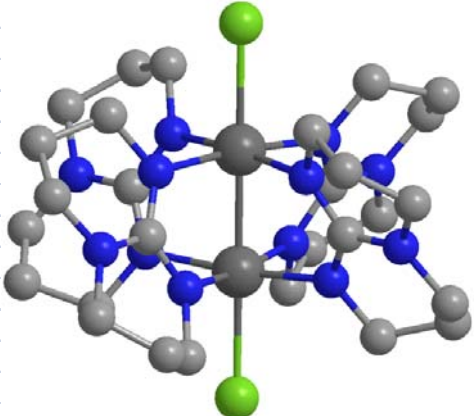 |               |               |               | C | 0.7361312990  | 0.7361310735  | 10.8750044475 |
|                                                                                   |               |               |               | N | 0.9395507494  | 1.4794759247  | 11.9675213445 |
|                                                                                   |               |               |               | C | 0.0215463810  | 1.4585798449  | 13.0926237287 |
|                                                                                   |               |               |               | C | -1.3500918731 | 0.9502893449  | 12.6807128109 |
|                                                                                   |               |               |               | C | -1.1811410610 | -0.3798803856 | 11.9742626485 |
|                                                                                   |               |               |               | H | 5.2975380336  | 2.4711864883  | 8.2515712837  |
|                                                                                   |               |               |               | H | 4.8293340593  | 0.8360290254  | 7.8449329340  |
|                                                                                   |               |               |               | H | 7.2414933028  | 0.8355895557  | 8.1886104018  |
|                                                                                   |               |               |               | H | 7.0835893906  | 1.6645474876  | 9.7473272374  |
|                                                                                   |               |               |               | H | 6.0952528441  | -1.1507486070 | 9.0630064587  |
|                                                                                   |               |               |               | H | 7.3871465383  | -0.7224179991 | 10.1934030127 |
|                                                                                   |               |               |               | H | 2.7798134153  | -0.0465380468 | 13.4984370805 |
|                                                                                   |               |               |               | H | 4.4149707703  | 0.4216656792  | 13.9050761369 |
|                                                                                   |               |               |               | H | 4.4154101817  | -1.9904934041 | 13.5613981425 |
| Pd                                                                                | 2.6255000017  | 2.6255000154  | 9.6663511669  | H | 3.5864524587  | -1.8325891969 | 12.0026812649 |
| Pd                                                                                | 2.6255000151  | 2.6255000020  | 12.0836575393 | H | 6.4017485209  | -0.8442525883 | 12.6870020430 |
| Cl                                                                                | 2.6254999973  | 2.6255000220  | 7.1600955479  | H | 5.9734180421  | -2.1361466173 | 11.5566058227 |
| Cl                                                                                | 2.6255000264  | 2.6254999970  | 14.5899127152 | H | -0.0465381295 | 2.7798133532  | 8.2515714768  |
| N                                                                                 | 4.3114496793  | 1.4794765350  | 9.7824877724  | H | 0.4216658860  | 4.4149707401  | 7.8449328747  |
| N                                                                                 | 5.4924697994  | -0.2414701172 | 10.8750041879 | H | -1.9904932922 | 4.4154104669  | 8.1886103819  |
| C                                                                                 | 5.2294536731  | 1.4585799197  | 8.6573850878  | H | -1.8325894939 | 3.5864525697  | 9.7473272474  |
| C                                                                                 | 6.6010919421  | 0.9502893394  | 9.0692958364  | H | -0.8442525709 | 6.4017485355  | 9.0630064702  |
| C                                                                                 | 6.4321410508  | -0.3798804149 | 9.7757460180  | H | -2.1361464893 | 5.9734181478  | 10.1934028572 |
| C                                                                                 | 4.5148689229  | 0.7361312804  | 10.8750044280 | H | 2.4711864444  | 5.2975379650  | 13.4984372514 |
| N                                                                                 | 3.7715240996  | 0.9395507438  | 11.9675213426 | H | 0.8360290293  | 4.8293342552  | 13.9050760891 |
| C                                                                                 | 3.7924201277  | 0.0215463458  | 13.0926237058 | H | 0.8355898107  | 7.2414933927  | 13.5613981488 |
| C                                                                                 | 4.3007106240  | -1.3500919069 | 12.6807127784 | H | 1.6645475657  | 7.0835891133  | 12.0026812937 |
| C                                                                                 | 5.6308803542  | -1.1811410917 | 11.9742626179 | H | -1.1507485971 | 6.0952528012  | 12.6870020742 |
| N                                                                                 | 0.9395503340  | 3.7715235083  | 9.7824877714  | H | -0.7224179403 | 7.3871466393  | 11.5566057092 |
| N                                                                                 | -0.2414699390 | 5.4924699781  | 10.8750043154 | H | 2.7798134546  | 5.2975380765  | 8.2515713585  |
| C                                                                                 | 0.0215462768  | 3.7924199809  | 8.6573851302  | H | 4.4149708949  | 4.8293341042  | 7.8449329164  |
| C                                                                                 | -1.3500919680 | 4.3007106593  | 9.0692958402  | H | 4.4154104389  | 7.2414933223  | 8.1886104081  |
| C                                                                                 | -1.1811409957 | 5.6308804124  | 9.7757460053  | H | 3.5864525149  | 7.0835894398  | 9.7473272506  |
| C                                                                                 | 0.7361310528  | 4.5148686960  | 10.8750044679 | H | 6.4017485722  | 6.0952527788  | 9.0630064820  |
| N                                                                                 | 1.4794759430  | 4.3114492694  | 11.9675213412 | H | 5.9734180307  | 7.3871465525  | 10.1934029733 |
| C                                                                                 | 1.4585797833  | 5.2294536042  | 13.0926237473 | H | 5.2975380018  | 2.7798135154  | 13.4984371871 |
| C                                                                                 | 0.9502893559  | 6.6010918759  | 12.6807127980 | H | 4.8293343020  | 4.4149709153  | 13.9050760972 |
| C                                                                                 | -0.3798803761 | 6.4321411210  | 11.9742626255 | H | 7.2414934172  | 4.4154101842  | 13.5613981298 |
| N                                                                                 | 3.7715234889  | 4.3114496859  | 9.7824877730  | H | 7.0835891539  | 3.5864524300  | 12.0026812728 |
| N                                                                                 | 5.4924700540  | 5.4924698792  | 10.8750042491 | H | 6.0952527574  | 6.4017485681  | 12.6870020352 |
| C                                                                                 | 3.7924200451  | 5.2294537074  | 8.6573851080  | H | 7.3871466601  | 5.9734179594  | 11.5566057238 |
| C                                                                                 | 4.3007106478  | 6.6010919709  | 9.0692958485  | H | 2.4711865968  | -0.0465380861 | 8.2515714051  |
| C                                                                                 | 5.6308803996  | 6.4321410600  | 9.7757460291  | H | 0.8360291906  | 0.4216659355  | 7.8449328881  |
| C                                                                                 | 4.5148687148  | 4.5148689438  | 10.8750044462 | H | 0.8355895283  | -1.9904932667 | 8.1886103667  |
| N                                                                                 | 4.3114492756  | 3.7715240826  | 11.9675213380 | H | 1.6645474308  | -1.8325894475 | 9.7473272268  |
| C                                                                                 | 5.2294536368  | 3.7924201936  | 13.0926237252 | H | -1.1507485689 | -0.8442526334 | 9.0630064388  |
| C                                                                                 | 6.6010919050  | 4.3007106320  | 12.6807127769 | H | -0.7224181158 | -2.1361464743 | 10.1934028870 |
| C                                                                                 | 6.4321411373  | 5.6308803594  | 11.9742626000 | H | -0.0465380138 | 2.4711865413  | 13.4984371413 |
| N                                                                                 | 1.4794765172  | 0.9395503410  | 9.7824877702  | H | 0.4216657377  | 0.8360291780  | 13.9050761305 |
| N                                                                                 | -0.2414700430 | -0.2414698578 | 10.8750042480 | H | -1.9904933611 | 0.8355897802  | 13.5613981808 |
| C                                                                                 | 1.4585799892  | 0.0215463132  | 8.6573851084  | H | -1.8325891691 | 1.6645475141  | 12.0026813057 |
| C                                                                                 | 0.9502893287  | -1.3500919368 | 9.0692958217  | H | -0.8442525985 | -1.1507485611 | 12.6870020811 |
| C                                                                                 | -0.3798804274 | -1.1811409847 | 9.7757459866  | H | -2.1361465819 | -0.7224180503 | 11.5566058239 |

**Table S6. Metric comparison between DFT optimized and X-ray determined structure of S3.**

| functional/BS I | Pd-Pd (Å)   | Pd-N (Å)    | Pd-Cl (Å)   |
|-----------------|-------------|-------------|-------------|
| X-ray data      | <b>2.39</b> | <b>2.03</b> | <b>2.47</b> |
| B3PW91          | <b>2.42</b> | <b>2.04</b> | <b>2.51</b> |
| M06             | 2.44        | 2.05        | 2.51        |
| B3LYP           | 2.44        | 2.06        | 2.54        |

**Table S7. Experimental and calculated absorption spectra (TD-DFT) of S3.**

| functional/BS I       | wavelength (nm) | transition      | oscillator strength |
|-----------------------|-----------------|-----------------|---------------------|
| experimental          | 648             |                 |                     |
| B3PW91 <sup>a</sup>   | 770             | MO 174 → MO 176 | 0.009               |
| mPW1PW91 <sup>a</sup> | 673             | MO 174 → MO 176 | 0.015               |
| B3P86 <sup>a</sup>    | 702             | MO 174 → MO 176 | 0.013               |
| B3LYP <sup>a</sup>    | 763             | MO 174 → MO 176 | 0.009               |
| M06 <sup>b</sup>      | 721             | MO 174 → MO 176 | 0.012               |

<sup>a</sup>) TD-DFT was performed on the optimized structure of **S3** with B3PW91/BS I. <sup>b</sup>) TD-DFT was performed on the optimized structure of **S3** with M06/BS I.

**Figure S8. Simulated UV-VIS Spectrum of S3 with TD-mPW1PW91/BS I using the optimized structure of S3 with B3PW91/BS I.**

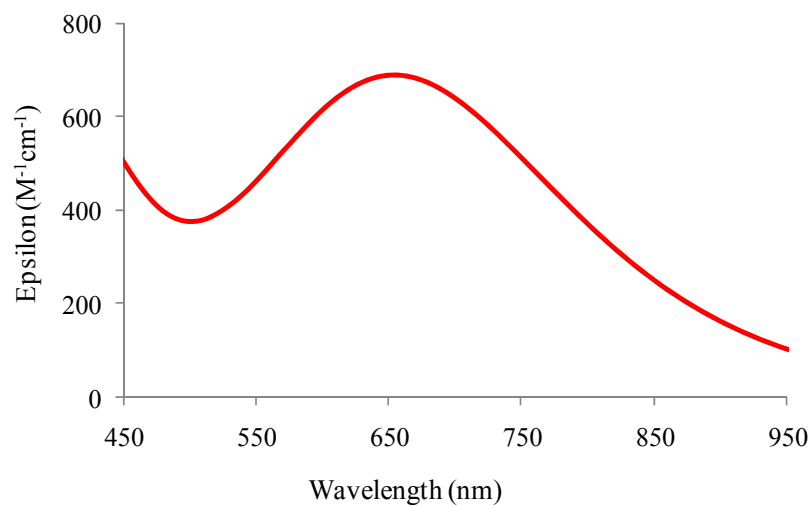

Calculated absorption band of **S3** corresponds to HOMO-1 → LUMO transition.<sup>21</sup>

---

<sup>21</sup> Cotton, F. A.; Koshevoy, I. O.; Lahuerta, P.; Murillo, C. A.; Sanau', M.; Ubeda, M. A.; Zhao, Q. L. *J. Am. Chem. Soc.* **2006**, *128*, 13674.

**Figure S9. Molecular orbitals of S3**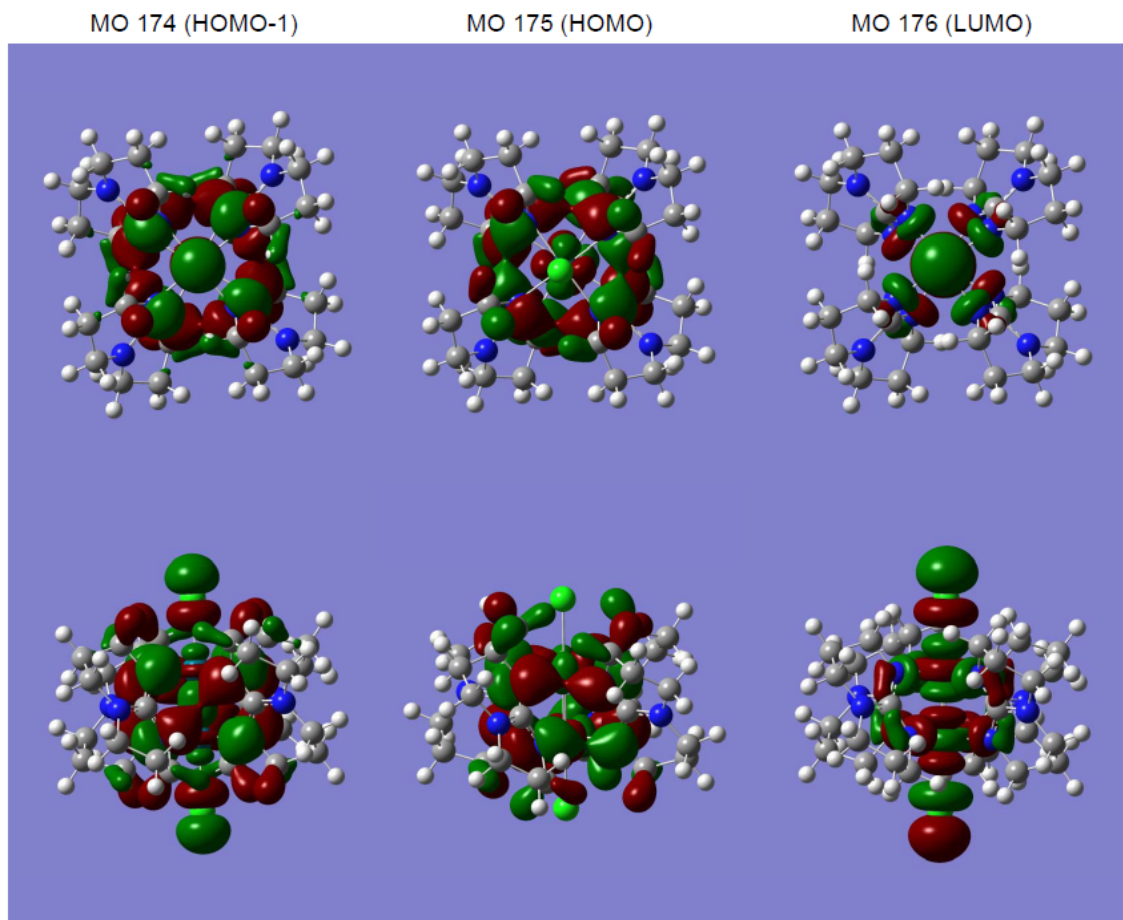

Molecular orbital plots of the HOMO-1, HOMO and the LUMO for the **S3** shown along the Pd-Pd axis. HOMO-1 and LUMO have antibonding characters on the Pd-Cl interaction.<sup>21</sup>

#### Discussion of the result of DFT calculation

We have computationally investigated the transition that corresponds to the observed UV-vis absorption of **S3** at 648 nm. During geometry optimizations, the B3PW91 functional was found to provide the best agreement between computed and experimentally determined Pd-Pd distance (2.42 Å (computed) versus 2.39 Å (experimental) as shown in Table S6). The UV-vis absorption band of **S3** was calculated based on the optimized structures of **S3** (as shown in Table S7). The computed absorption maxima were found to differ over a range of 673 to 770 nm depending on the functional employed. Despite these differences, all of the calculated absorptions were found to be composed of the excitation of MO 174 (HOMO -1) to MO 176 (LUMO). As shown in Figure S9, MO 174 has a Pd-Pd bonding character with participation of the ligand backbone. And the MO 176 is a Pd-Pd antibonding orbital. Thus the DFT calculation result has shown that the observed UV-vis feature of **S3** at 648 nm is likely a result of metal-metal bonding to metal-metal antibonding transition, which also has been observed from the UV-vis spectrum of dinuclear

Pd(III) complexes **24**, **S4** and the reaction mixture of eq 1 and eq S1. The result is also in accord with TD-DFT calculation of UV absorptions of dinuclear Pd(III) complex reported by Cotton.<sup>21</sup>

## Electrochemical Data

### Cyclic Voltammetry of **1**

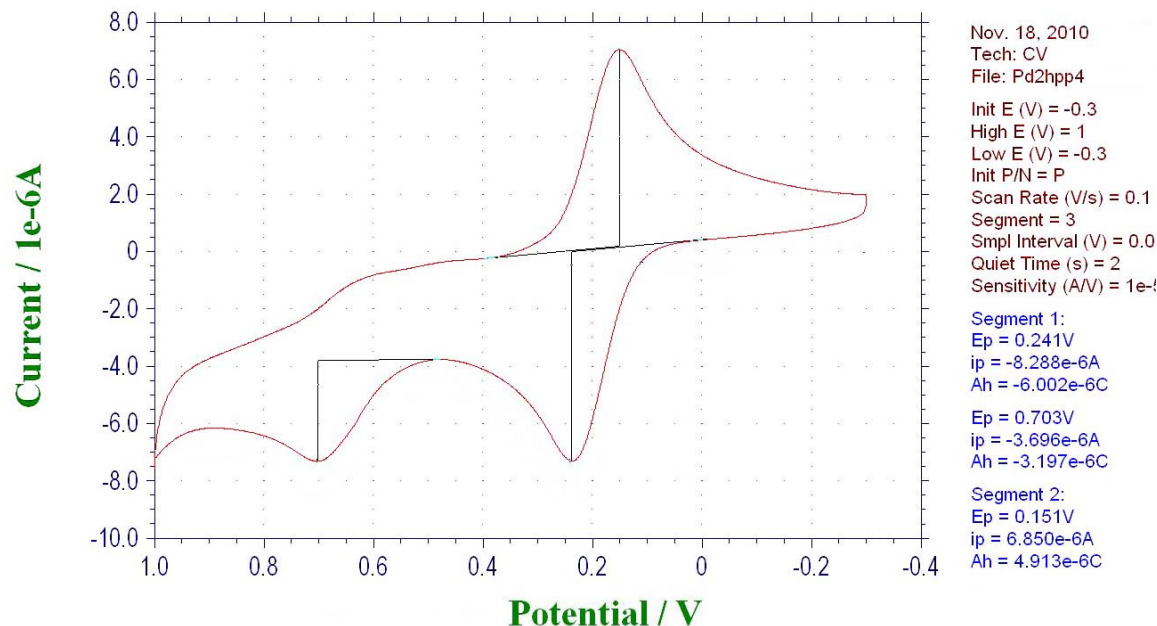

The CV of **1** was obtained from a 0.01 mM solution of **1** in CH<sub>2</sub>Cl<sub>2</sub> with a glassy carbon working electrode. NBu<sub>4</sub>·PF<sub>6</sub> (0.1 M) was used as the electrolyte. The CV was obtained at a scan rate of 0.1 V/s against Ag/AgCl and was confirmed external standard of ferrocene.

The reversible oxidation wave at  $E_{1/2} = -304$  mV (vs Fc/Fc<sup>+</sup>) is assigned to the Pd(II)–Pd(II) to Pd(II)–Pd(III) redox couple. The irreversible oxidation wave at 203 mV (vs. Fc/Fc<sup>+</sup>) is assigned to the oxidation of Pd(II)–Pd(III) to Pd(III)–Pd(III). For comparison, most bimetallic palladium complexes were reported to have first oxidation wave at 250–500 mV (vs Fc/Fc<sup>+</sup>) and second wave at 500–1000 mV (vs Fc/Fc<sup>+</sup>).<sup>7, 22</sup>

<sup>22</sup> Powers, D. C.; Geibel, M. A. L.; Klein, J. E. M. N.; Ritter, T. *J. Am. Chem. Soc.* **2009**, *131*, 17050.

## Electron Paramagnetic Resonance Spectrum of 1-catalyzed $\alpha$ -hydroxylation of S9

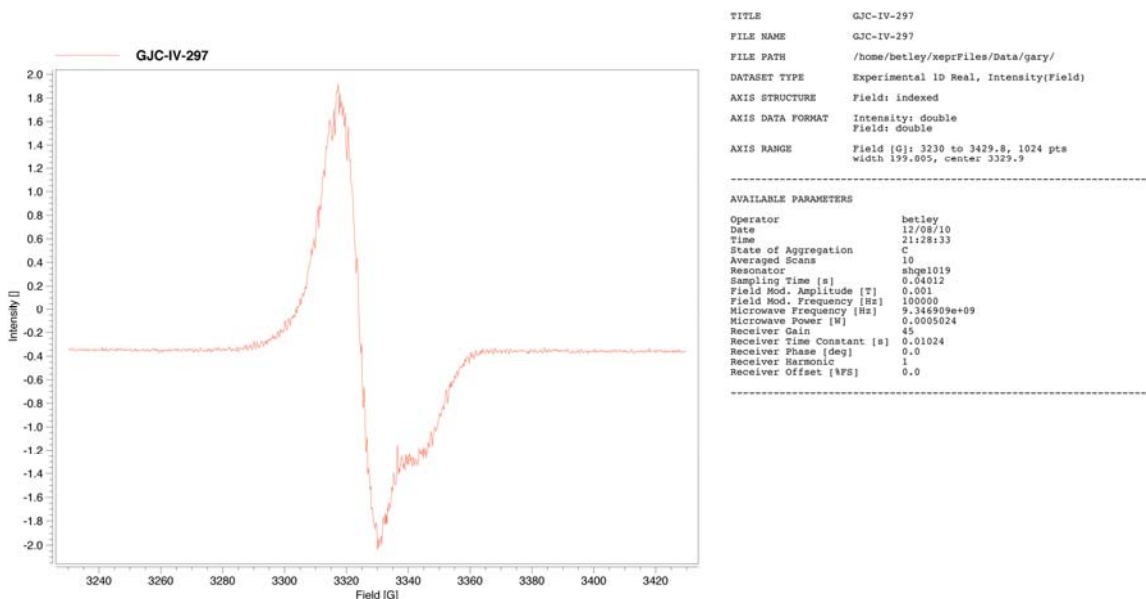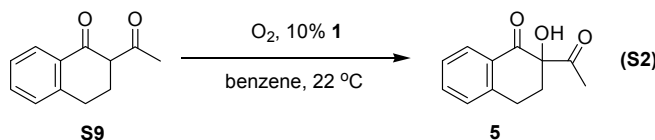

To a solution of 1 (7 mg, 0.01 mmol, 0.1 equiv) in benzene (2 mL) at 22 °C was added S9 (19 mg, 0.10 mmol, 1.0 equiv). The solution was stirred under 1 atm of O<sub>2</sub> for 1 min at 23 °C and moved into a liquid nitrogen bath. A Freeze-Pump-Thaw procedure was applied to the reaction mixture. The solution was transferred to a 4 mm EPR tube and sealed under N<sub>2</sub> atmosphere. The EPR data was collected on a Bruker ESP300E operating at X-band frequency (9 GHz). *q* value of the sample at frozen 77 K was measured at 2.0088. EPR signals of known Pd<sub>2</sub><sup>5+</sup> complexes in paddle construction with amidate ligands were reported at *q* = 2.010~2.014 in X-band.<sup>23</sup>

<sup>23</sup> (a) Cotton, F. A.; Matusz, M.; Poli, R.; Feng, X. *J. Am. Chem. Soc.* **1988**, *110*, 1144. (b) Berry, J. F.; Bill, E.; Bothe, E.; Cotton, F. A.; Dalal, N. S.; Ibragimov, S. A.; Kaur, N.; Liu, C. Y.; Murillo, C. A.; Nellutla, S.; North, J. M.; Villagra' n, D. *J. Am. Chem. Soc.* **2007**, *129*, 1393.

**Spectroscopic Data**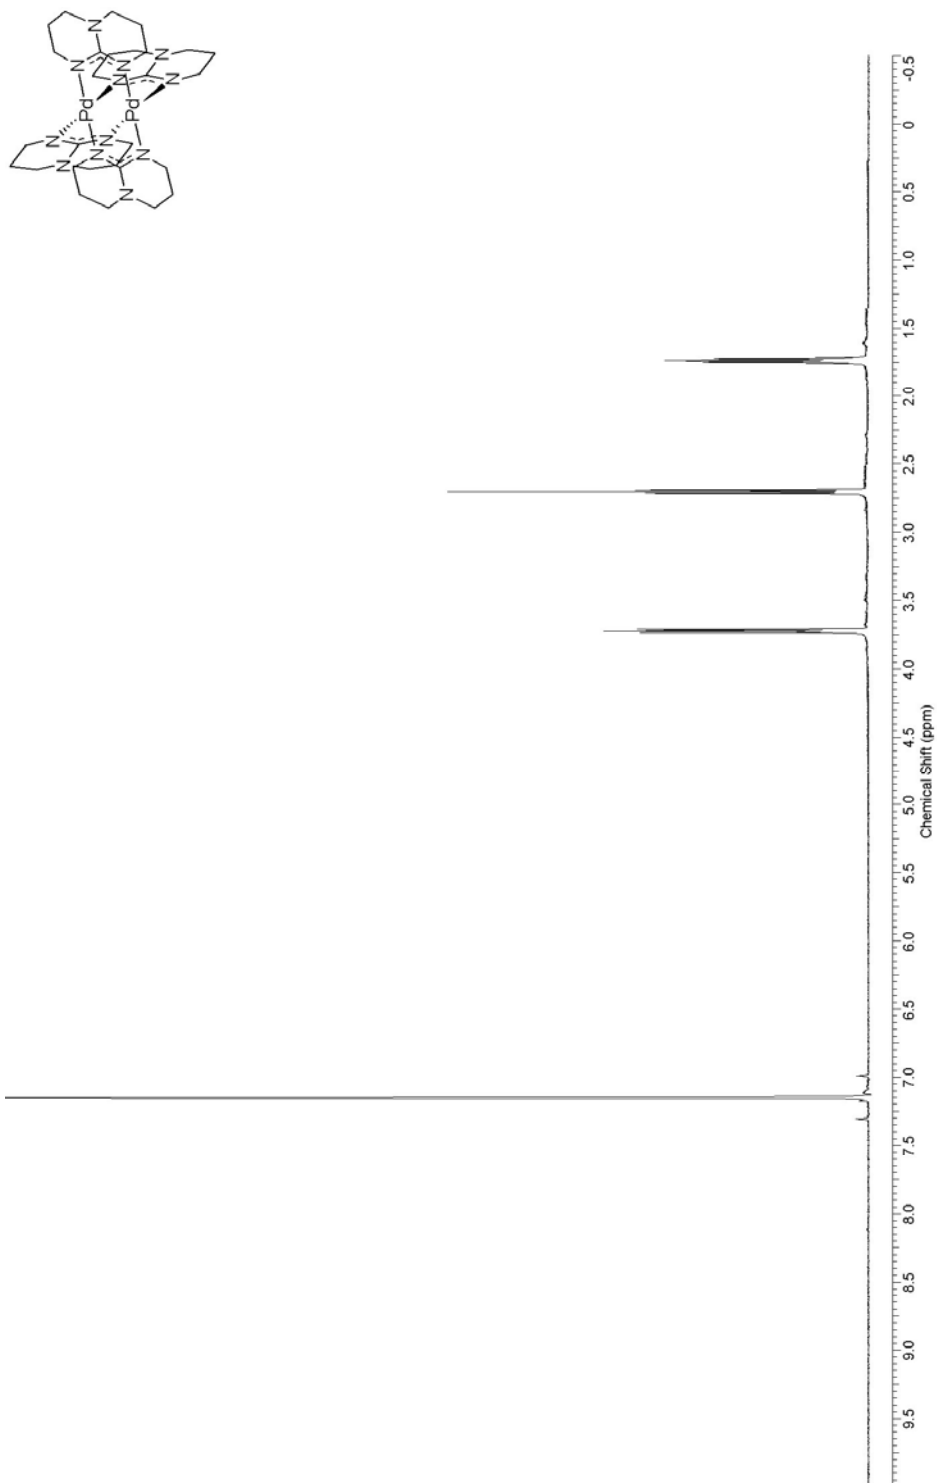 $^1\text{H}$  NMR spectrum of **1** in  $\text{CDCl}_3$  at  $23\text{ }^\circ\text{C}$

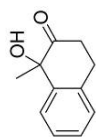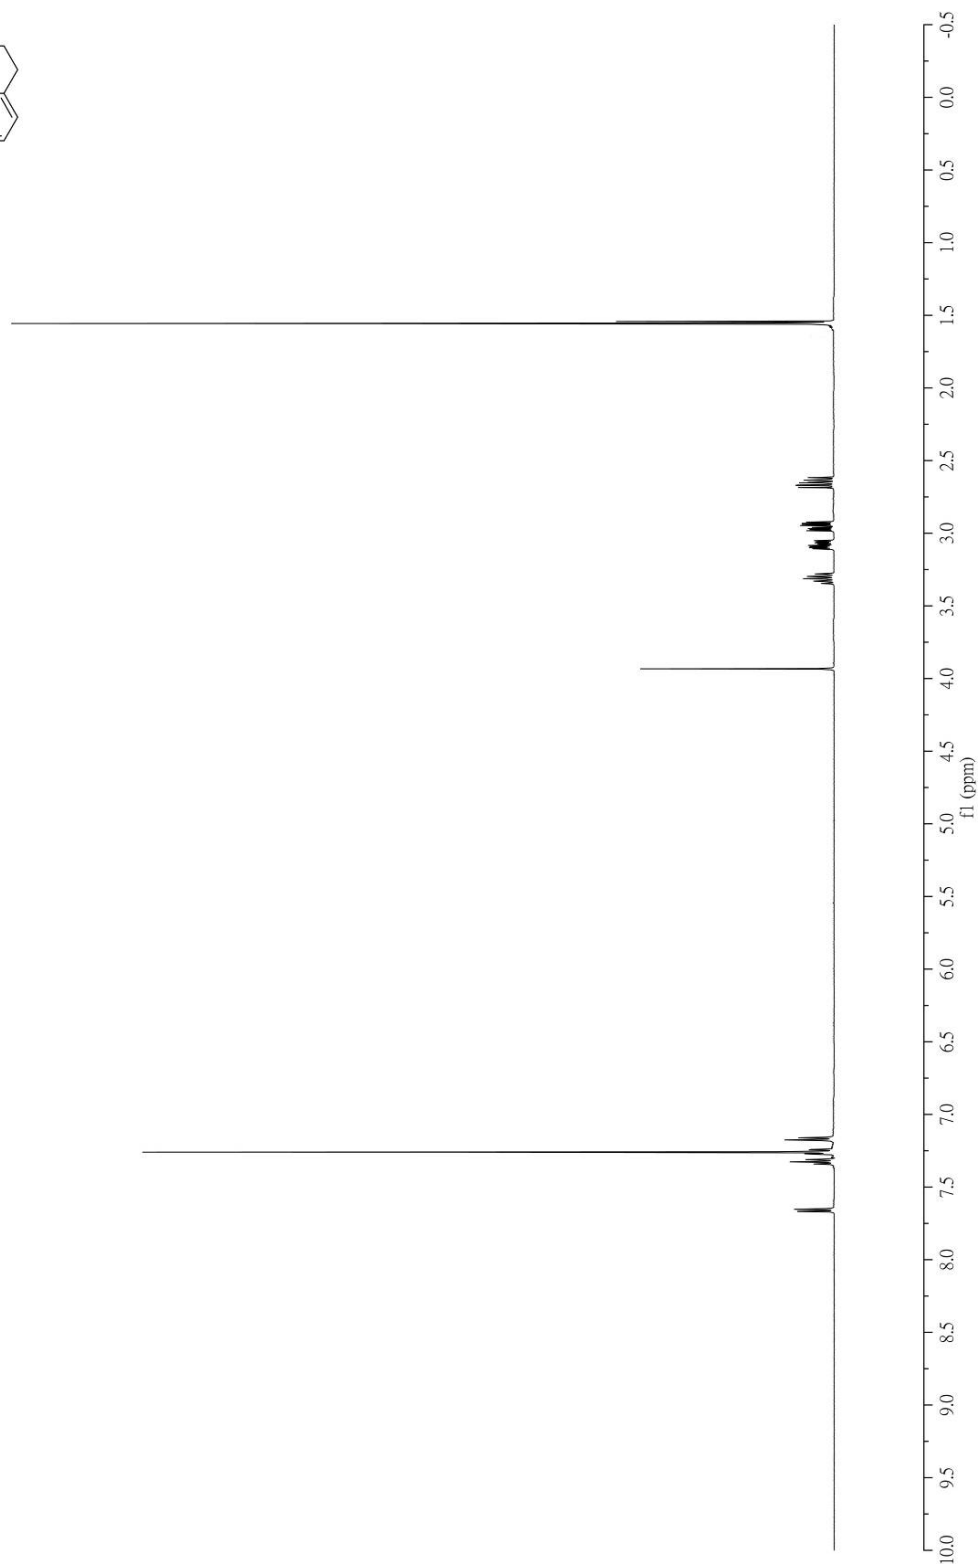

$^1\text{H}$  NMR spectrum of **4** in  $\text{CDCl}_3$  at  $23\text{ }^\circ\text{C}$



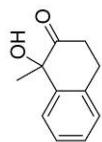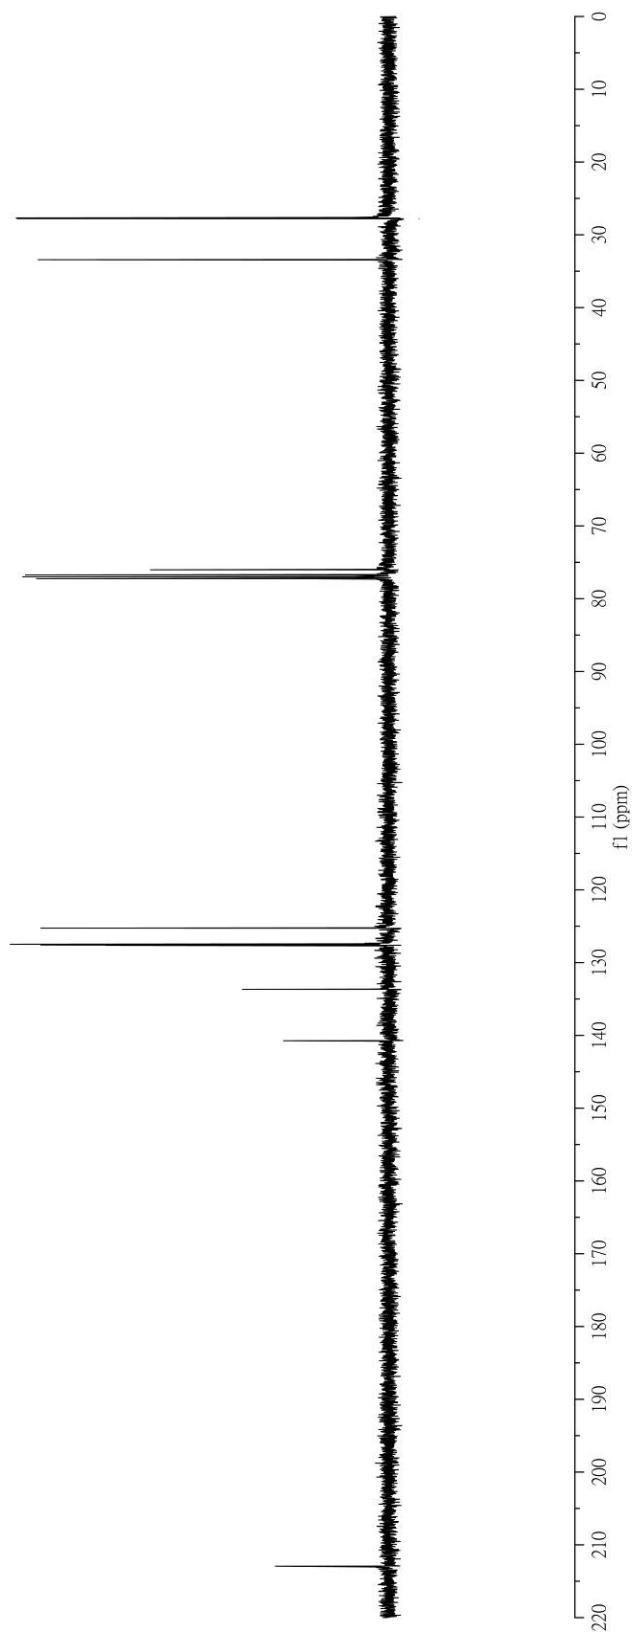

$^{13}\text{C}$  NMR spectrum of **4** in  $\text{CDCl}_3$  at 23 °C

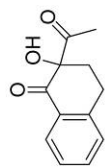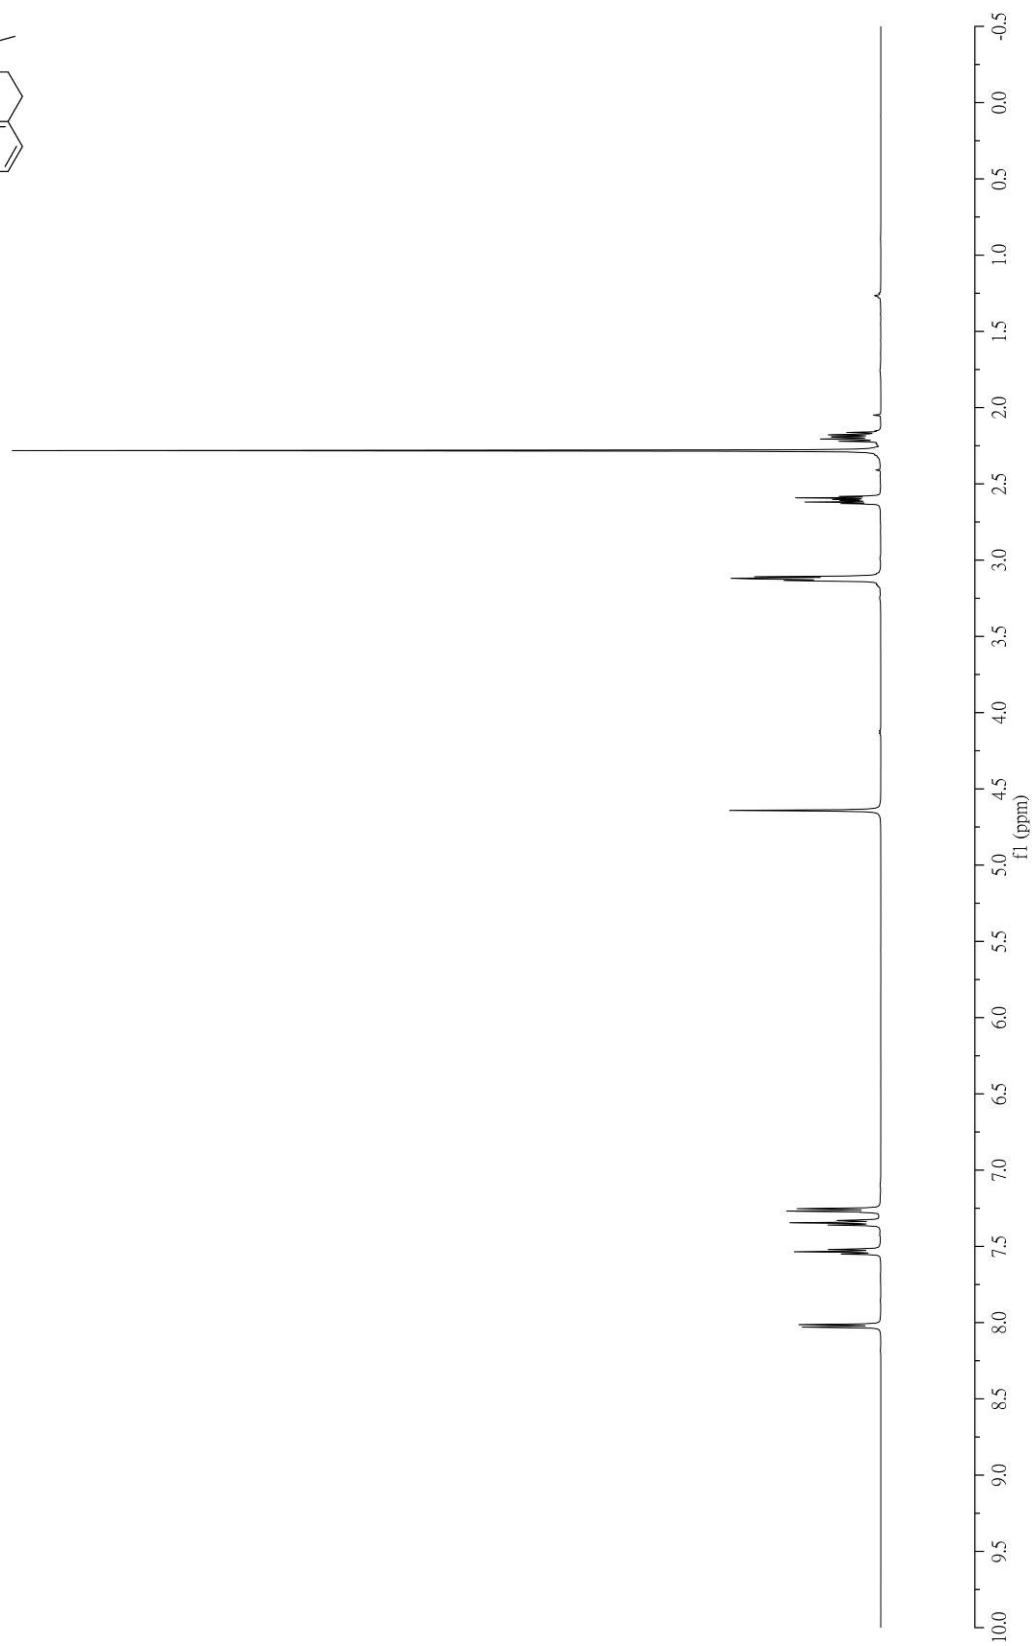

$^1\text{H}$  NMR spectrum of **5** in  $\text{CDCl}_3$  at  $23\text{ }^\circ\text{C}$

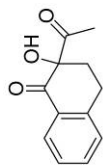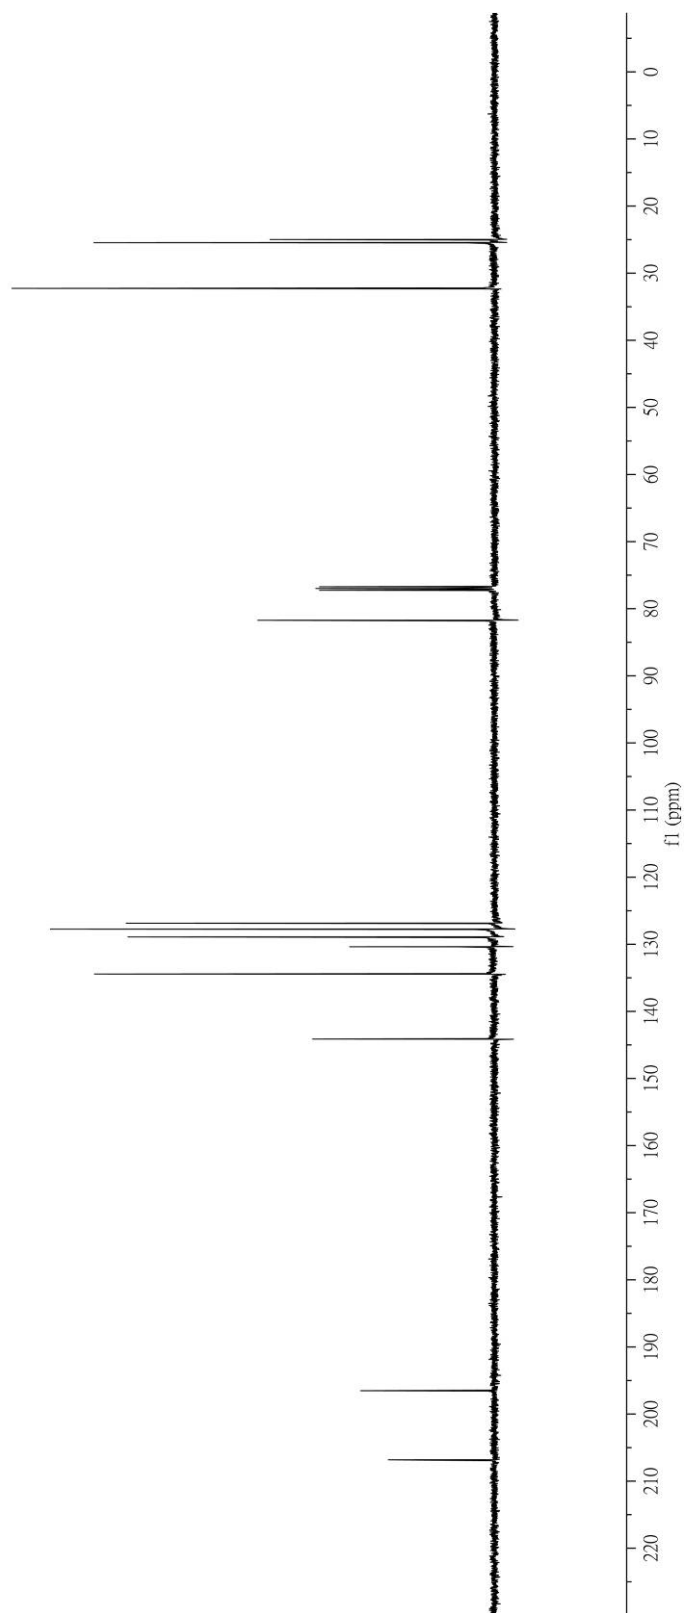

<sup>13</sup>C NMR spectrum of **5** in CDCl<sub>3</sub> at 23 °C

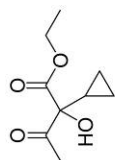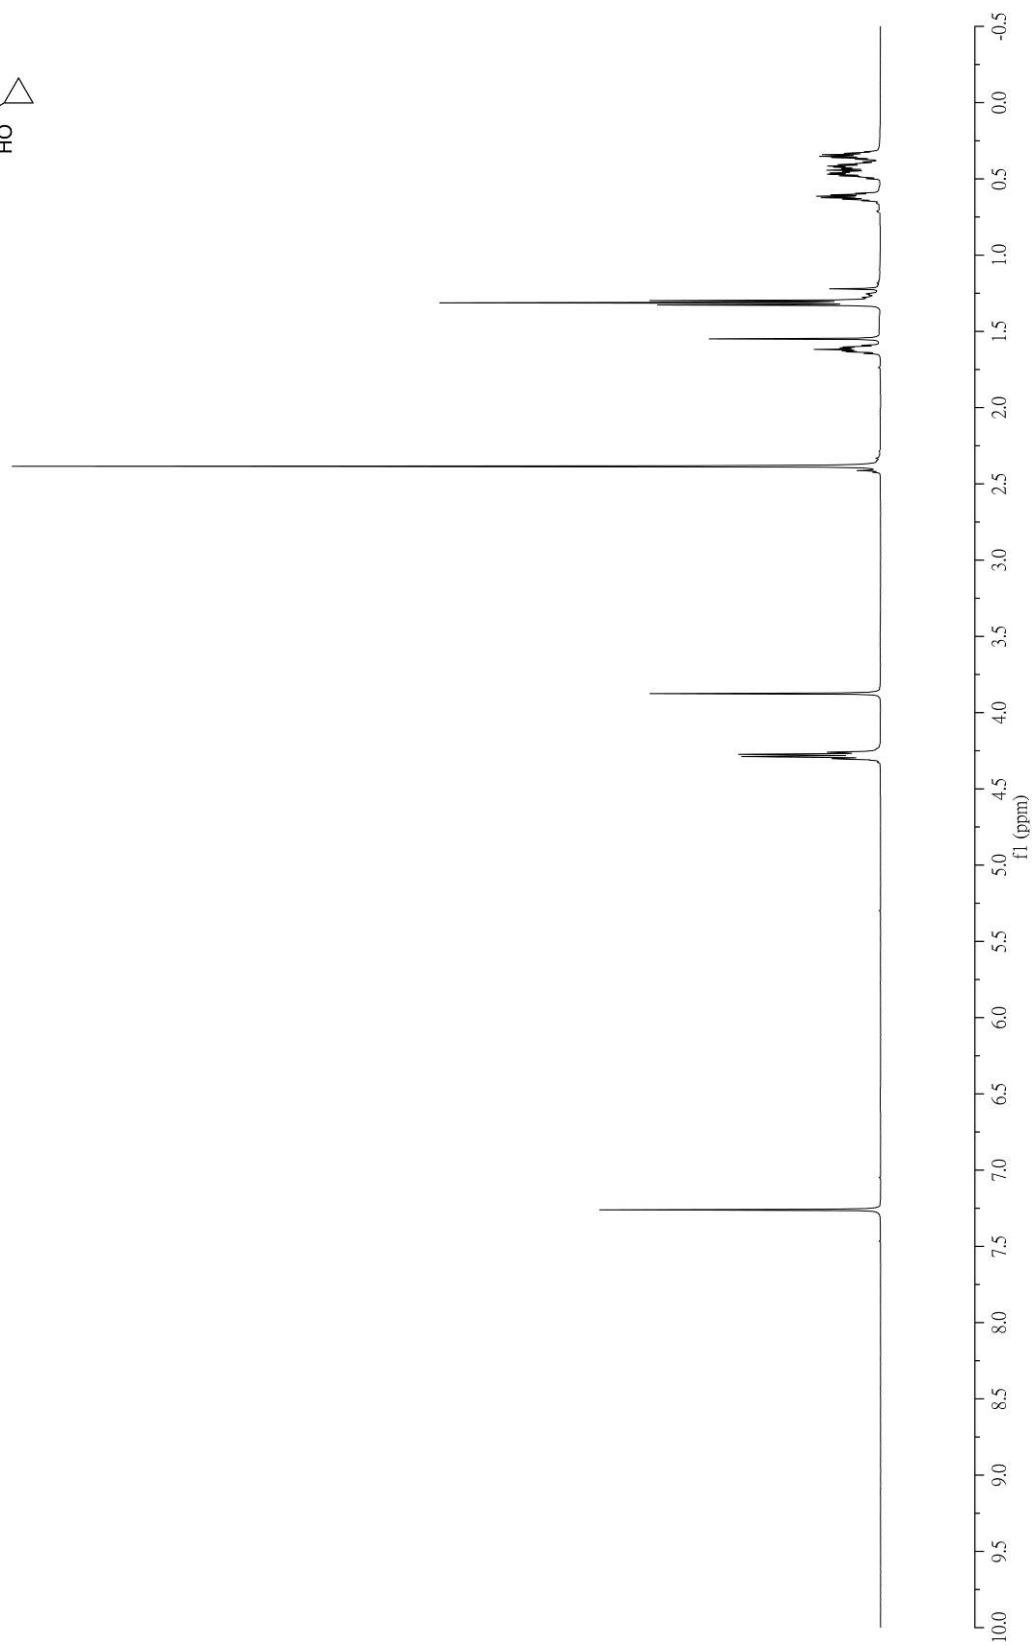

<sup>1</sup>H NMR spectrum of 6 in CDCl<sub>3</sub> at 23 °C

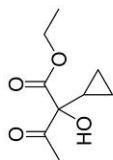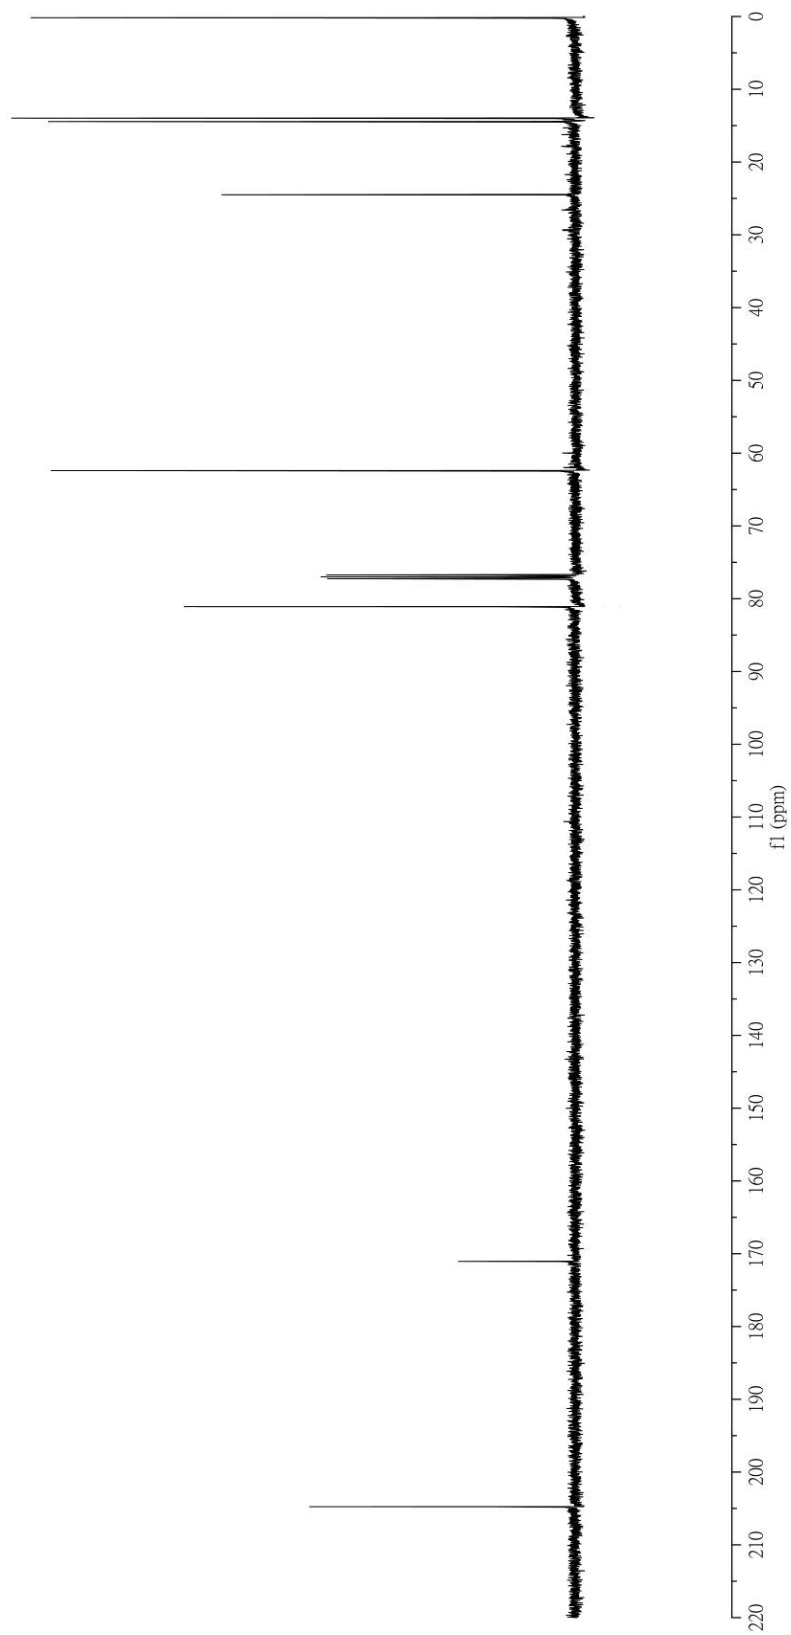

$^{13}\text{C}$  NMR spectrum of **6** in  $\text{CDCl}_3$  at 23 °C

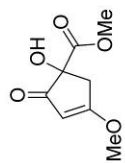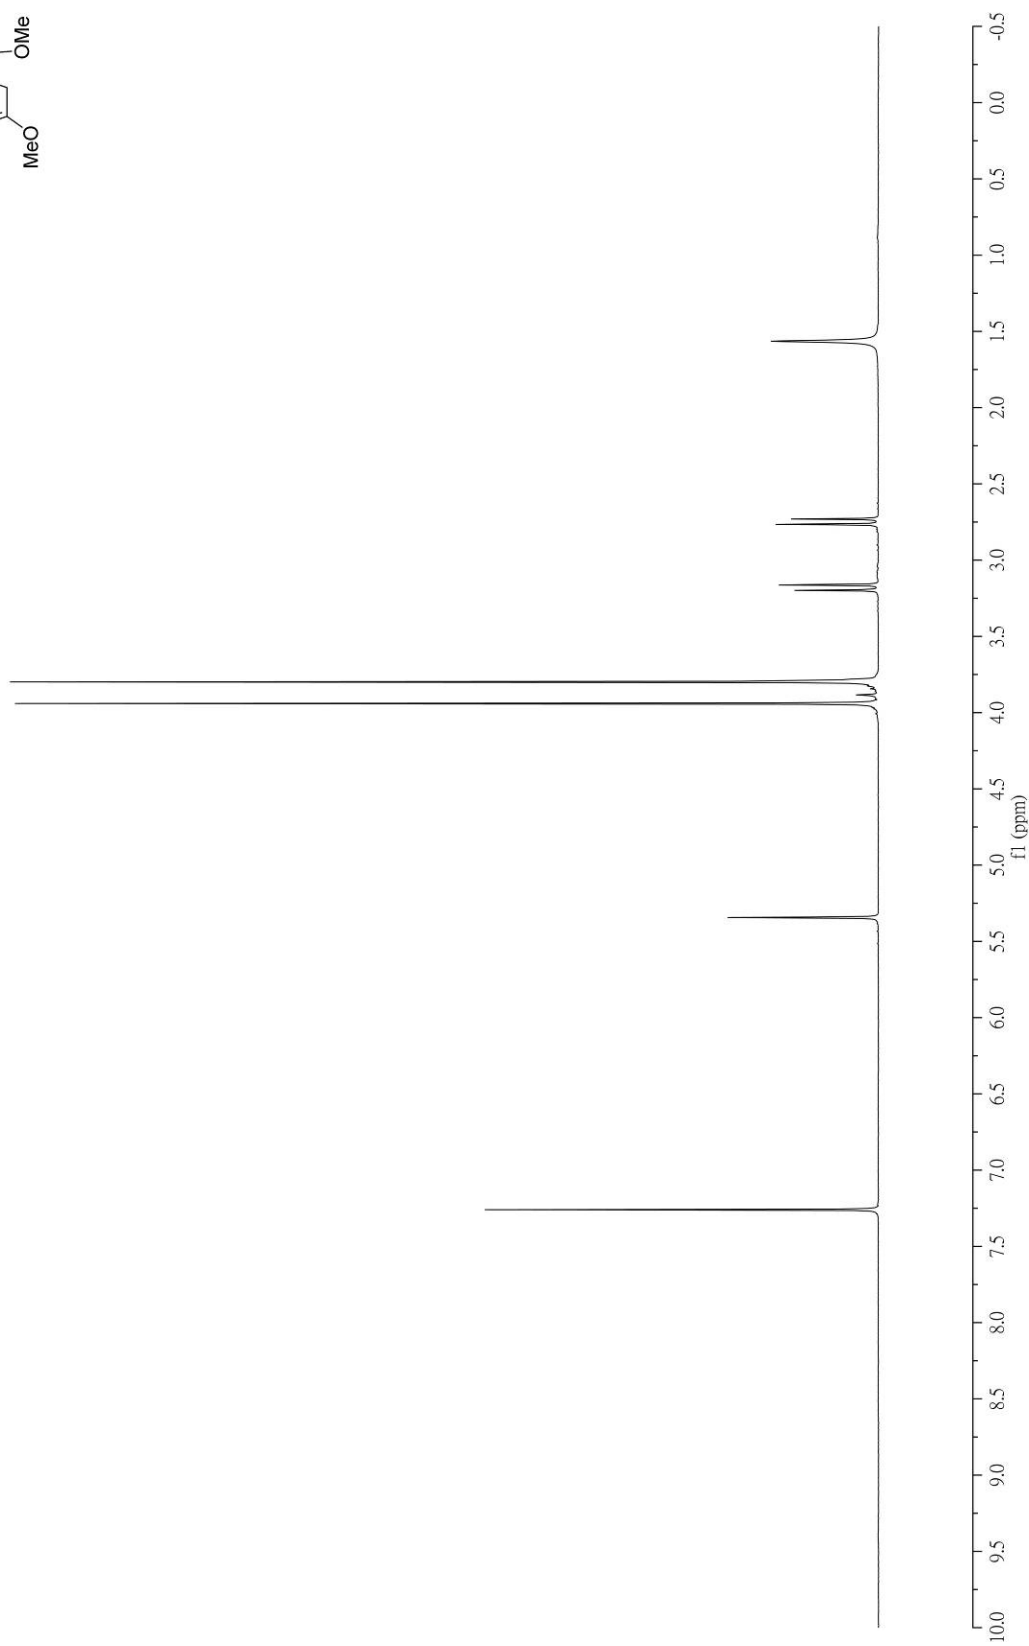

$^1\text{H}$  NMR spectrum of 7 in  $\text{CDCl}_3$  at 23 °C

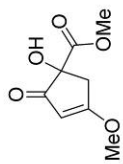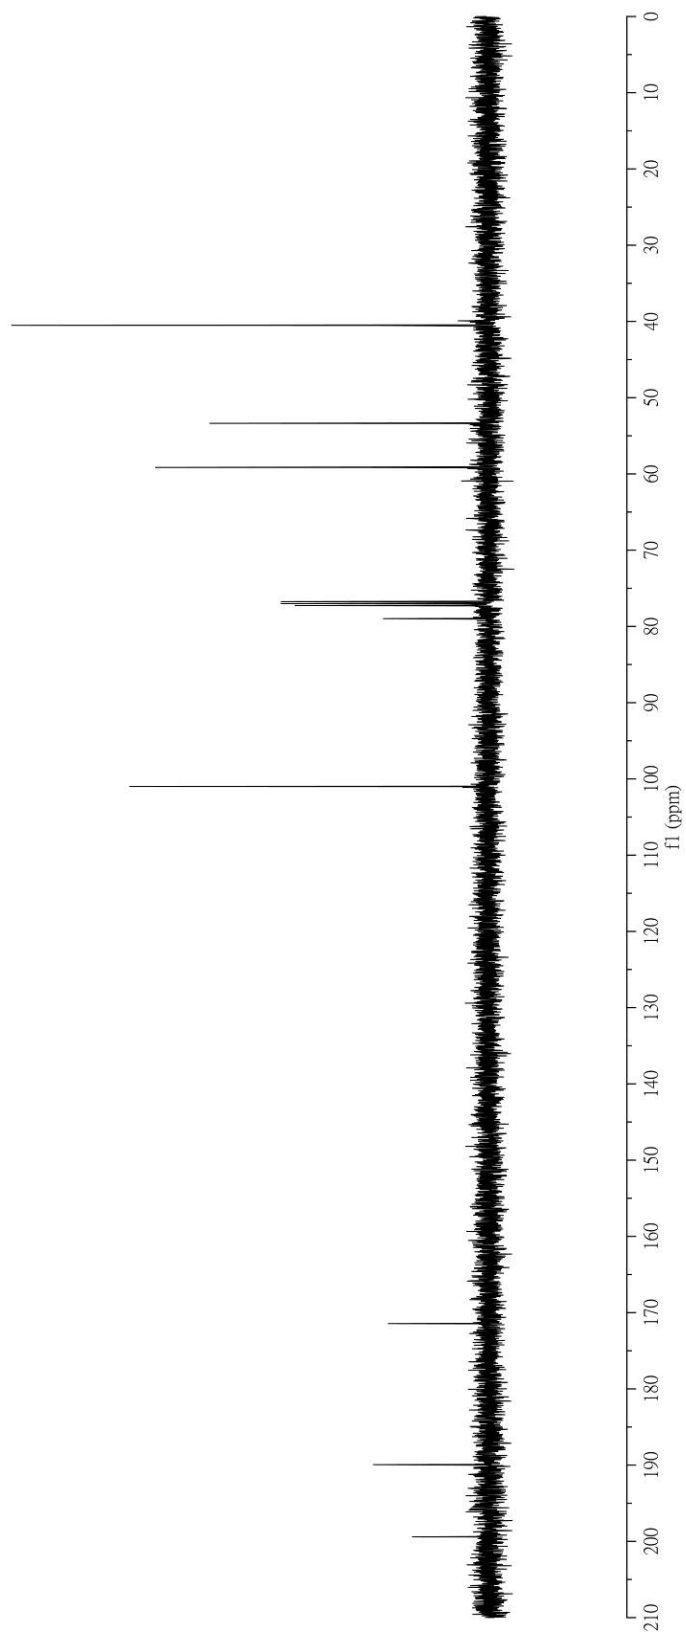

$^{13}\text{C}$  NMR spectrum of 7 in  $\text{CDCl}_3$  at 23 °C

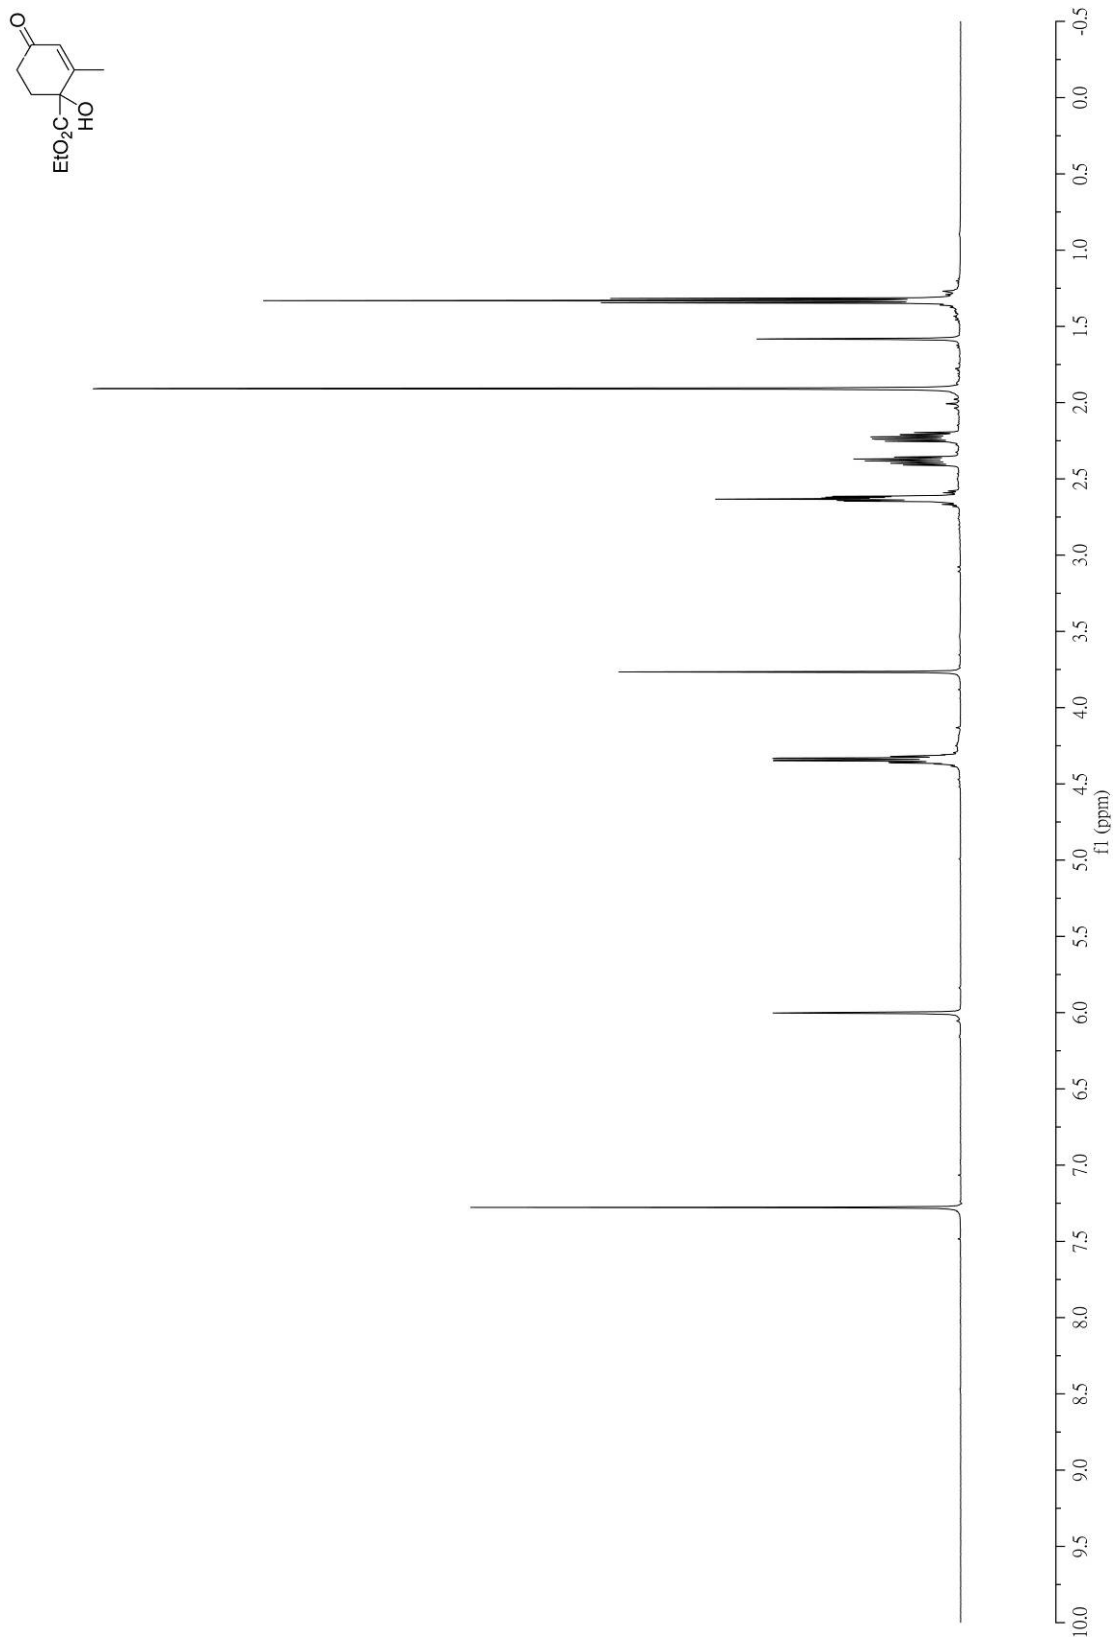

$^1\text{H}$  NMR spectrum of **8** in  $\text{CDCl}_3$  at  $23\text{ }^\circ\text{C}$



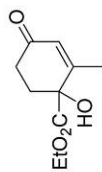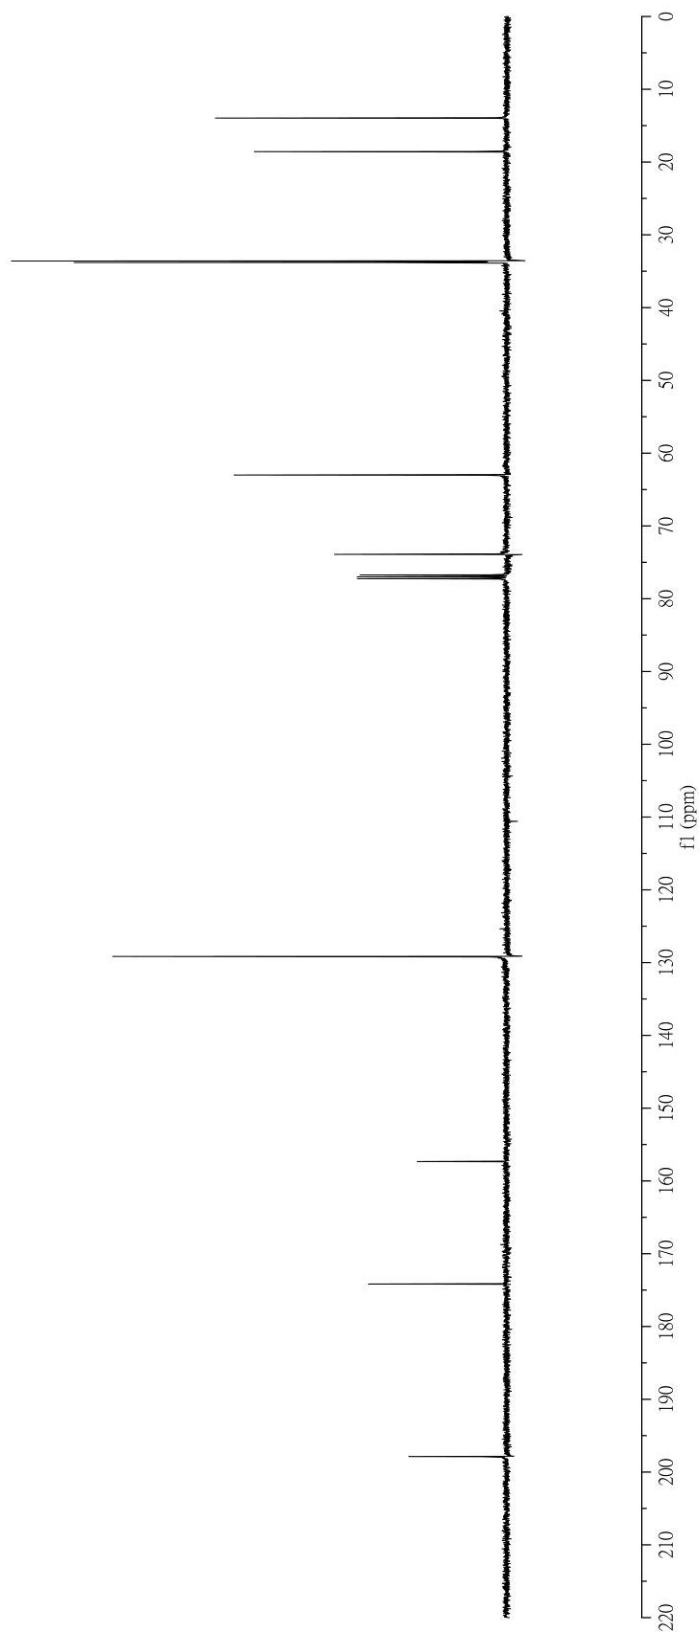

$^{13}\text{C}$  NMR spectrum of **8** in  $\text{CDCl}_3$  at 23 °C

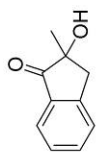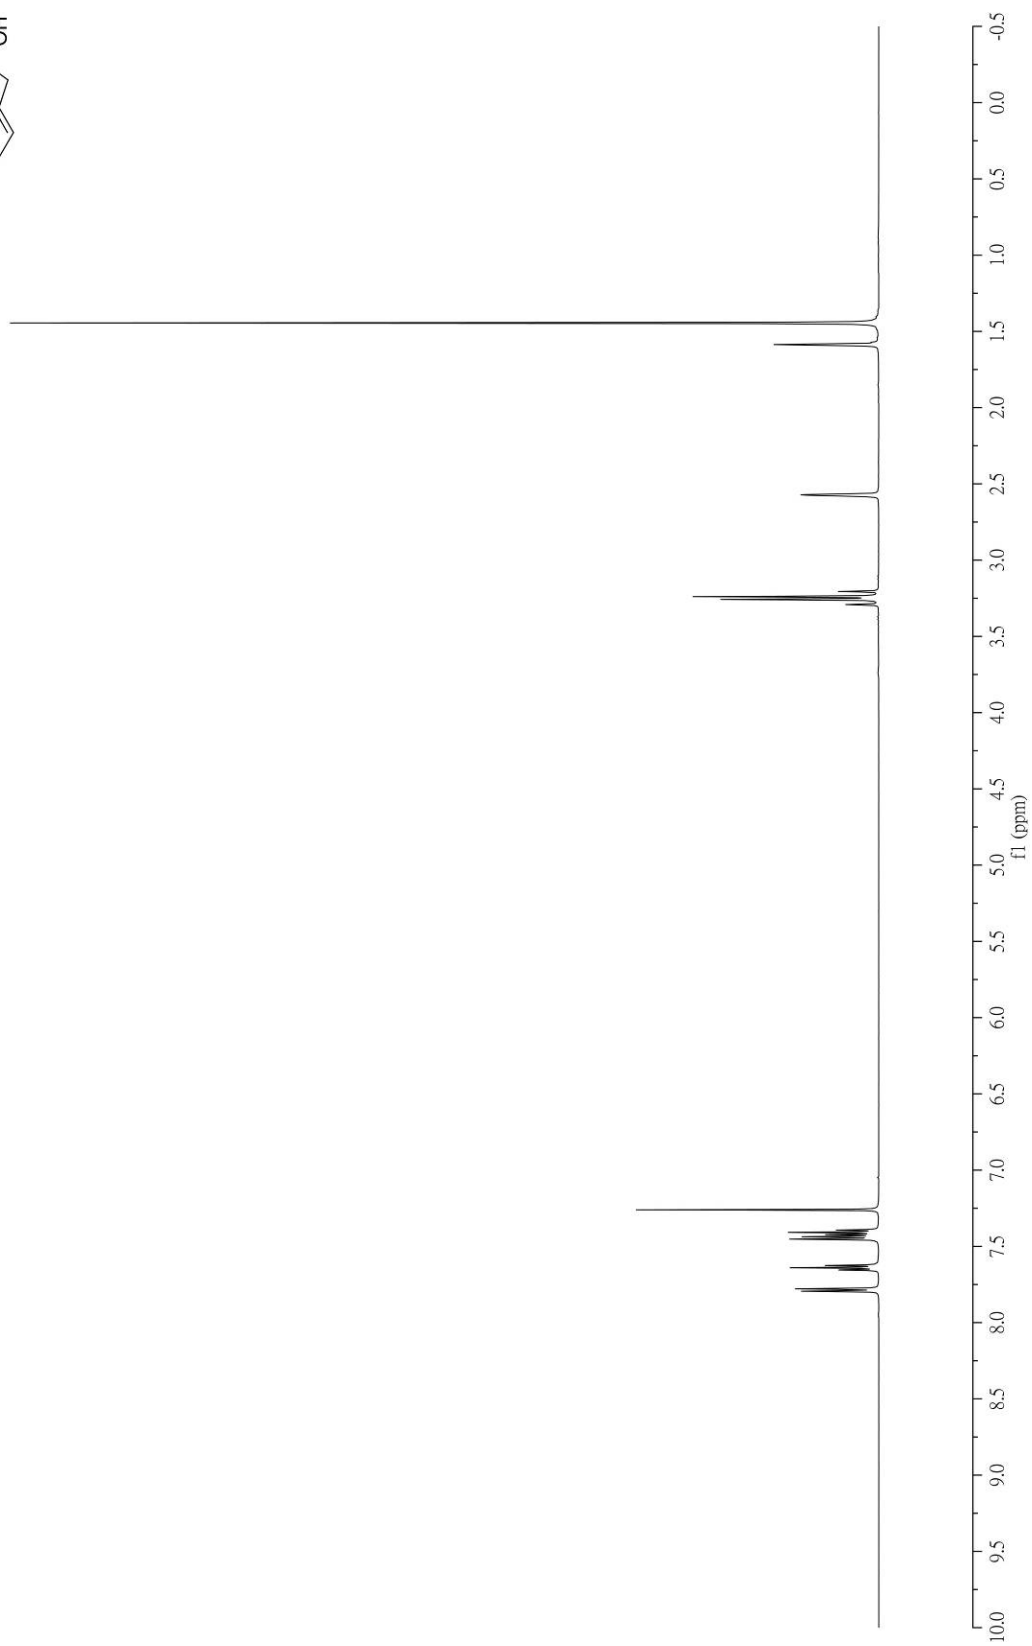

<sup>1</sup>H NMR spectrum of **9** in CDCl<sub>3</sub> at 23 °C

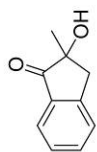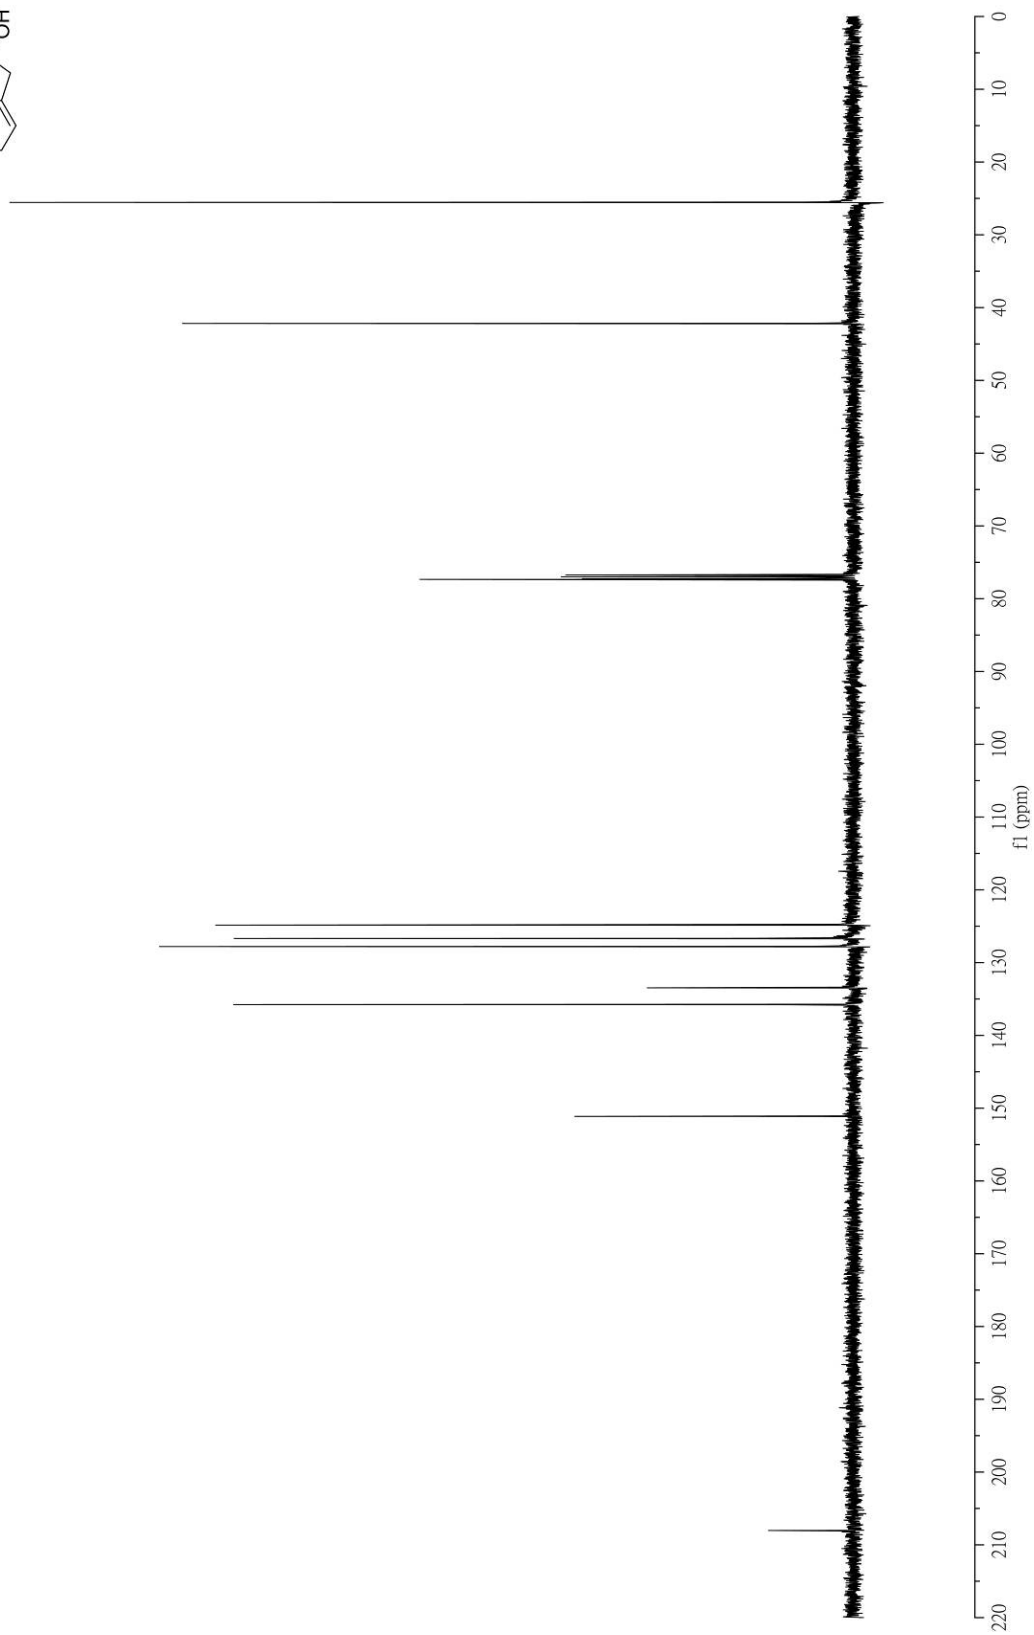

$^{13}\text{C}$  NMR spectrum of **9** in  $\text{CDCl}_3$  at 23 °C

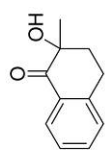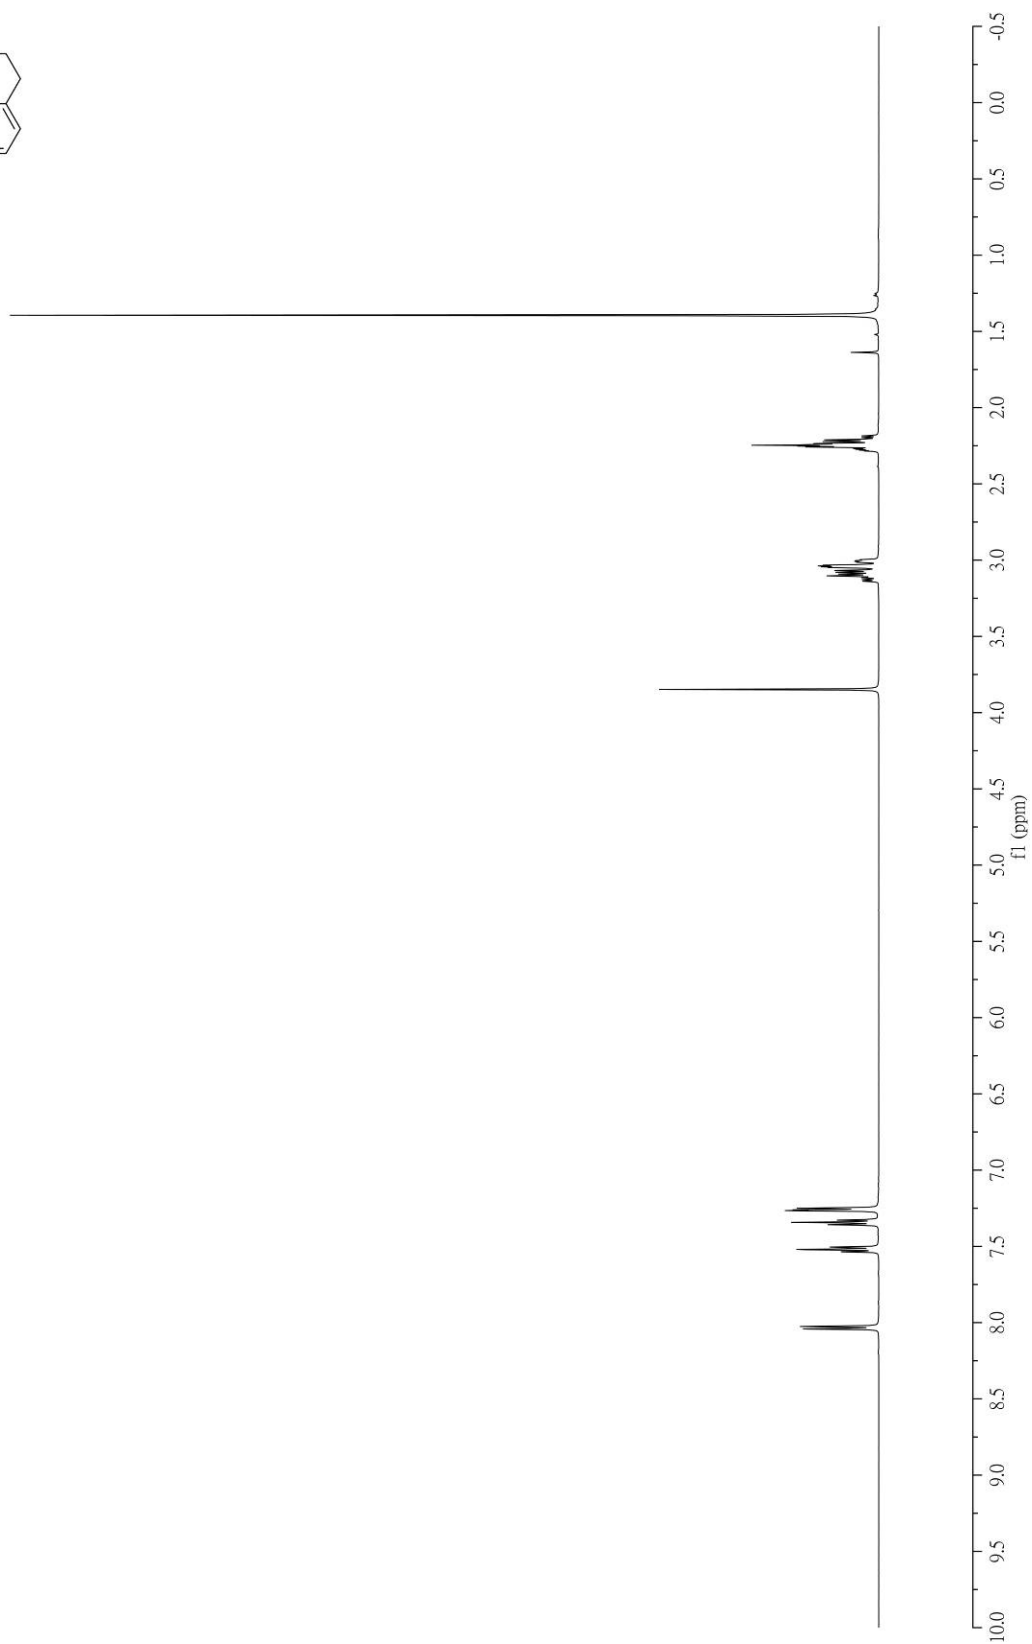

$^1\text{H}$  NMR spectrum of **10** in  $\text{CDCl}_3$  at  $23\text{ }^\circ\text{C}$

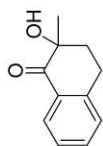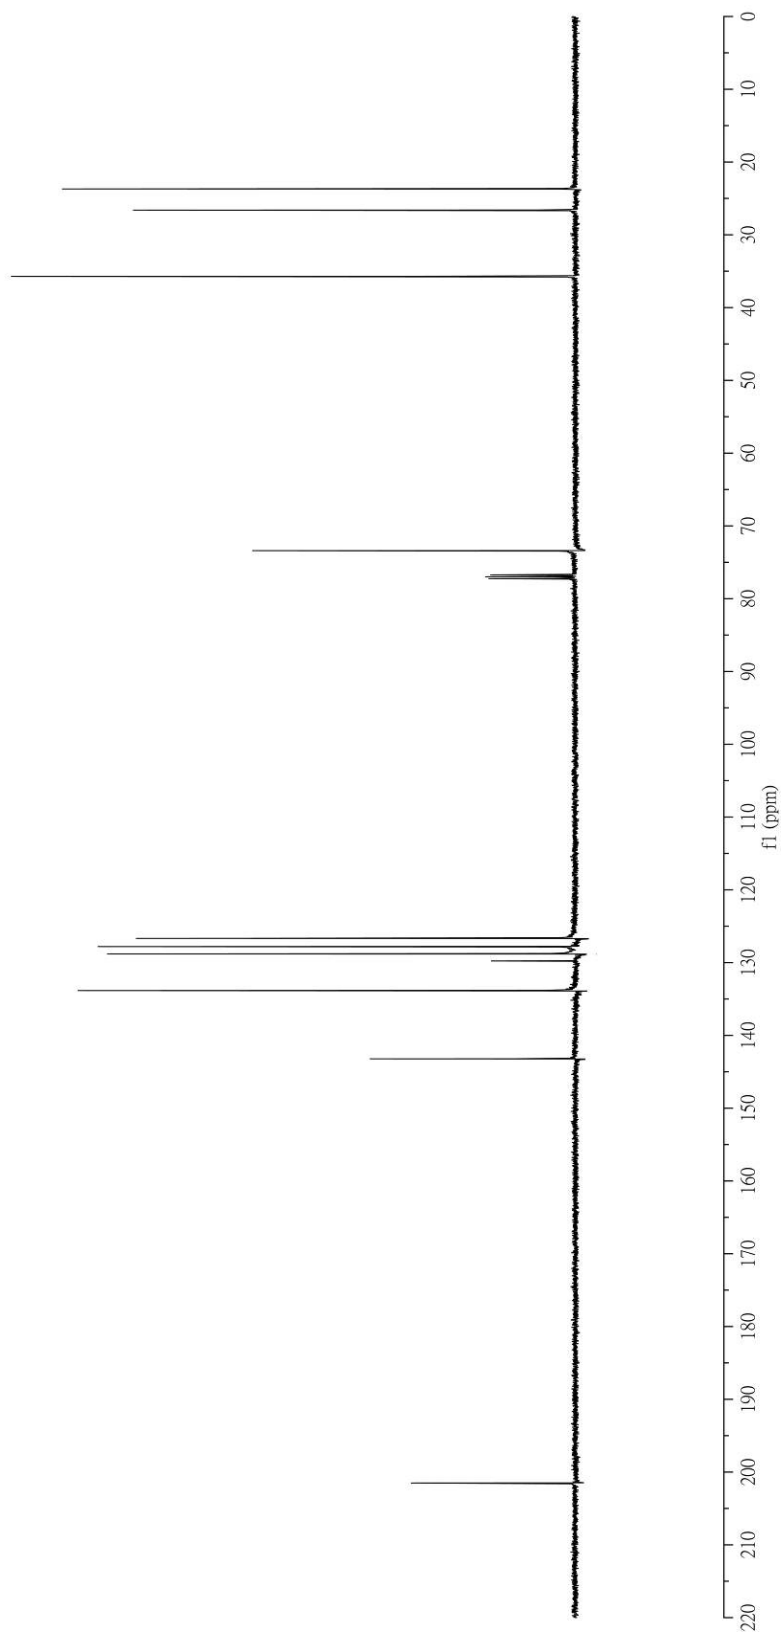

$^{13}\text{C}$  NMR spectrum of **10** in  $\text{CDCl}_3$  at 23 °C

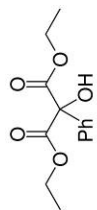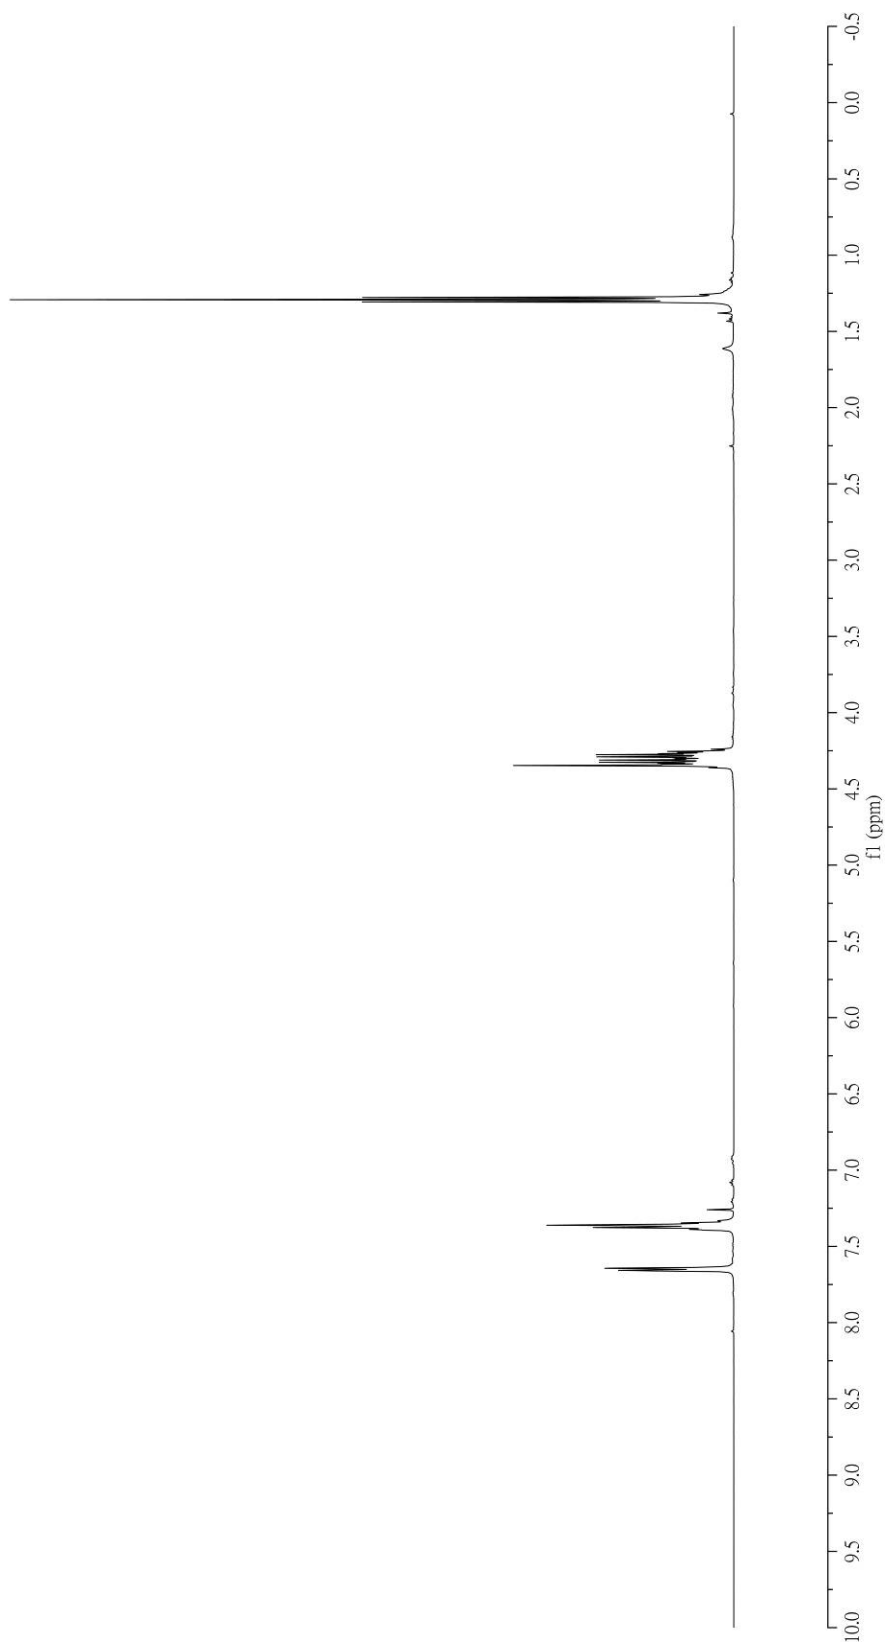

$^1\text{H}$  NMR spectrum of **11** in  $\text{CDCl}_3$  at  $23\text{ }^\circ\text{C}$

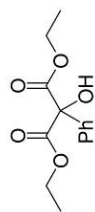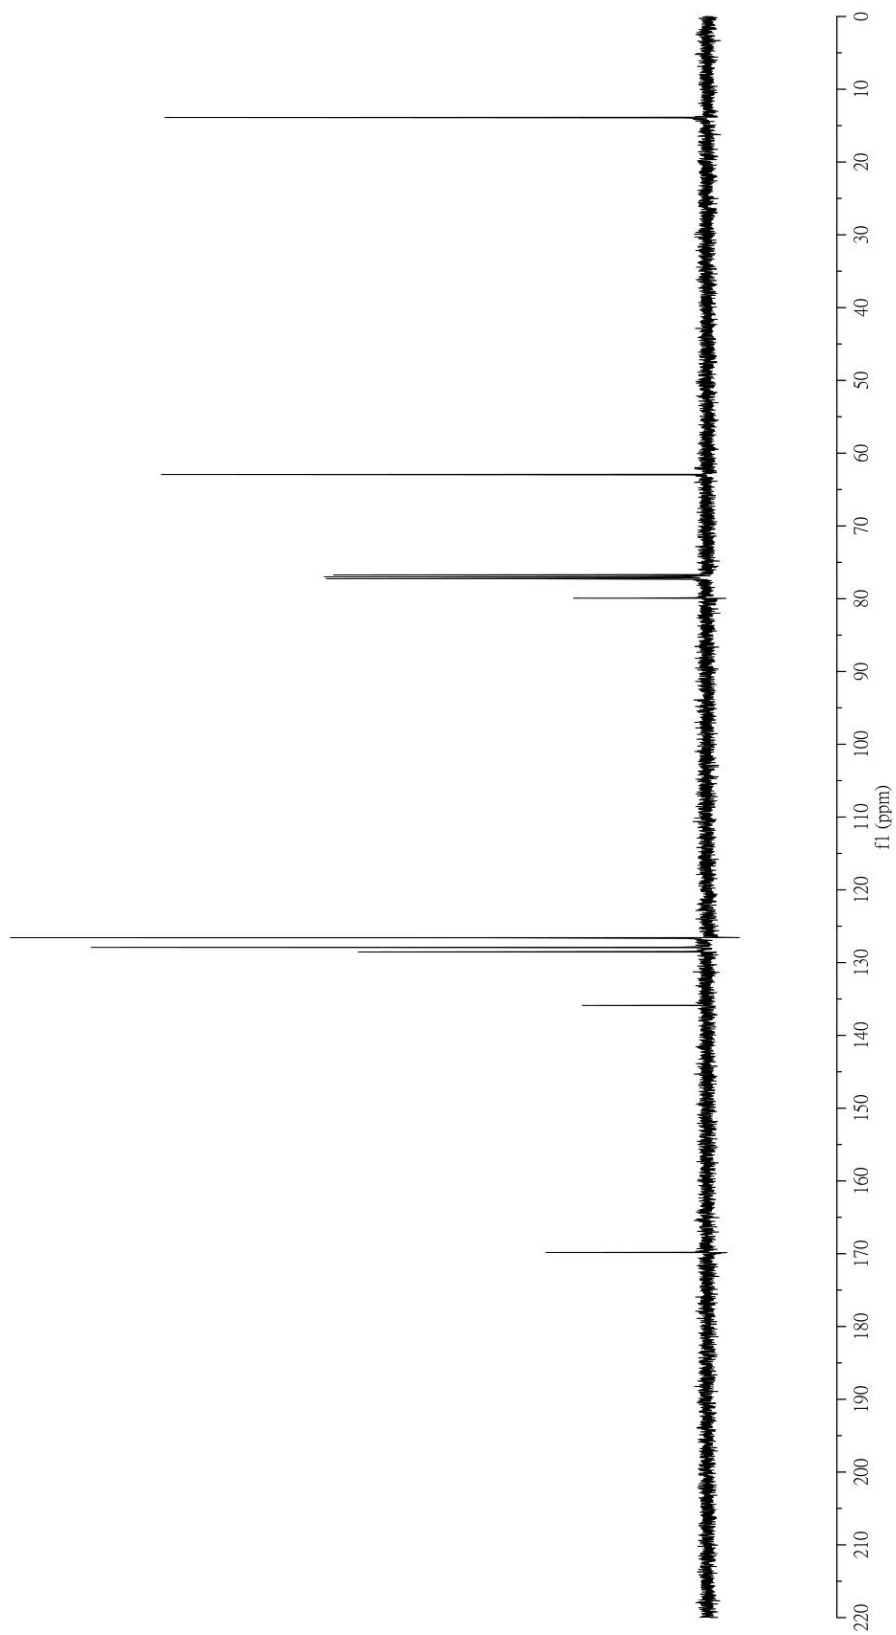

$^{13}\text{C}$  NMR spectrum of **11** in  $\text{CDCl}_3$  at  $23\text{ }^\circ\text{C}$

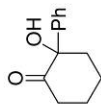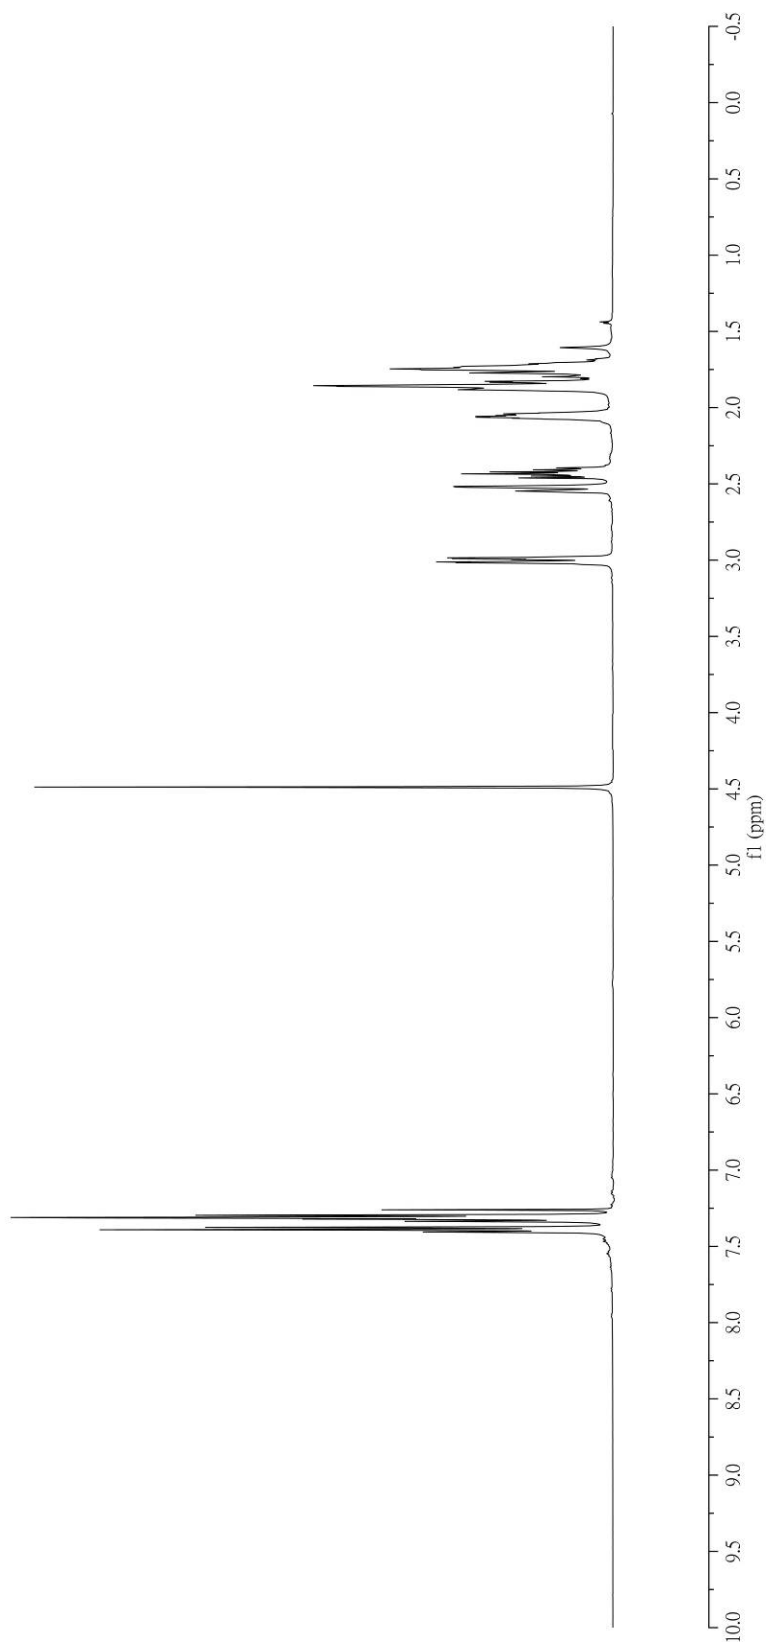

$^1\text{H}$  NMR spectrum of **12** in  $\text{CDCl}_3$  at  $23\text{ }^\circ\text{C}$



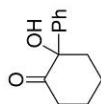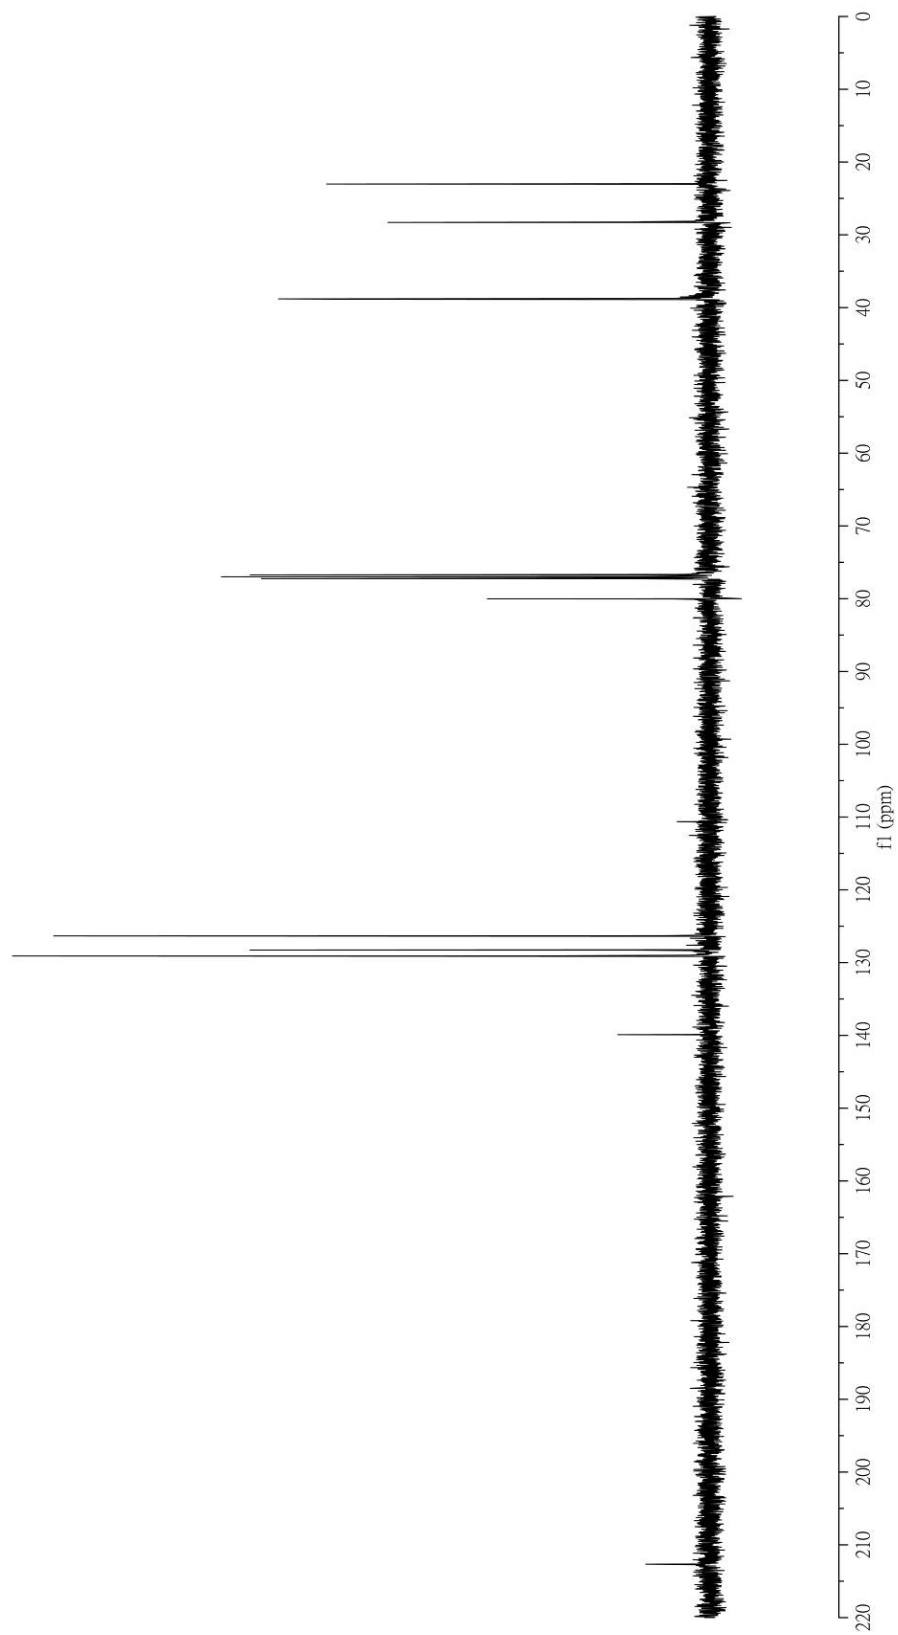

$^{13}\text{C}$  NMR spectrum of **12** in  $\text{CDCl}_3$  at  $23\text{ }^\circ\text{C}$

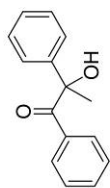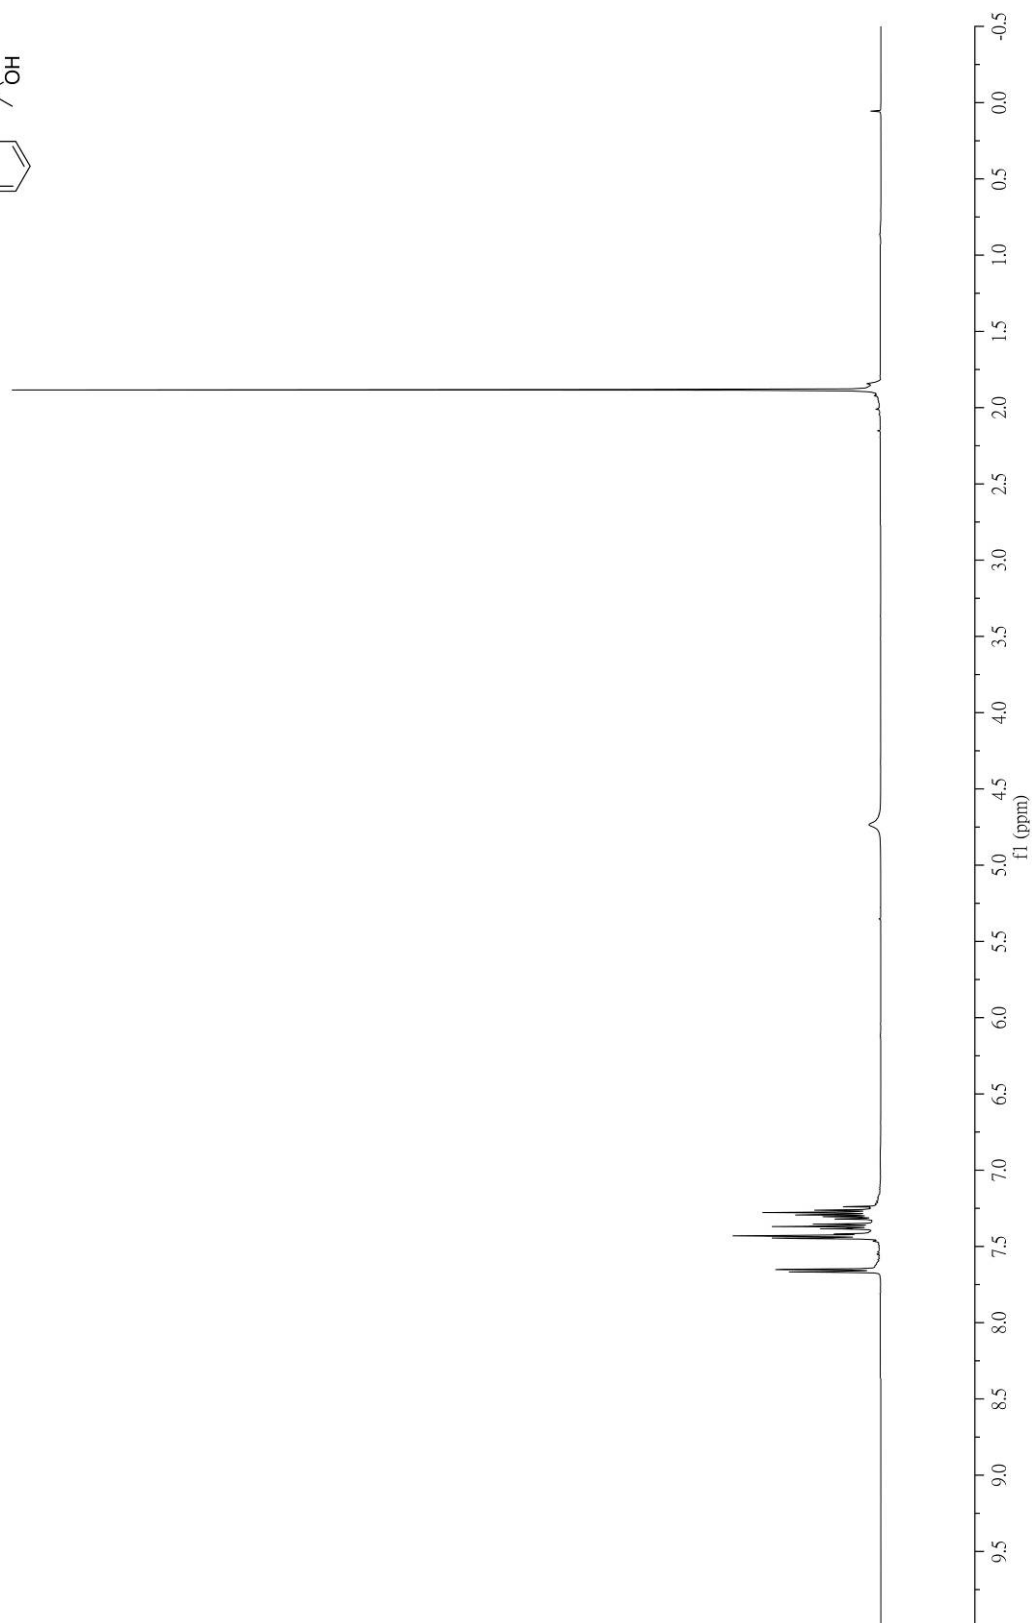

<sup>1</sup>H NMR spectrum of **13** in CDCl<sub>3</sub> at 23 °C

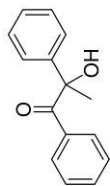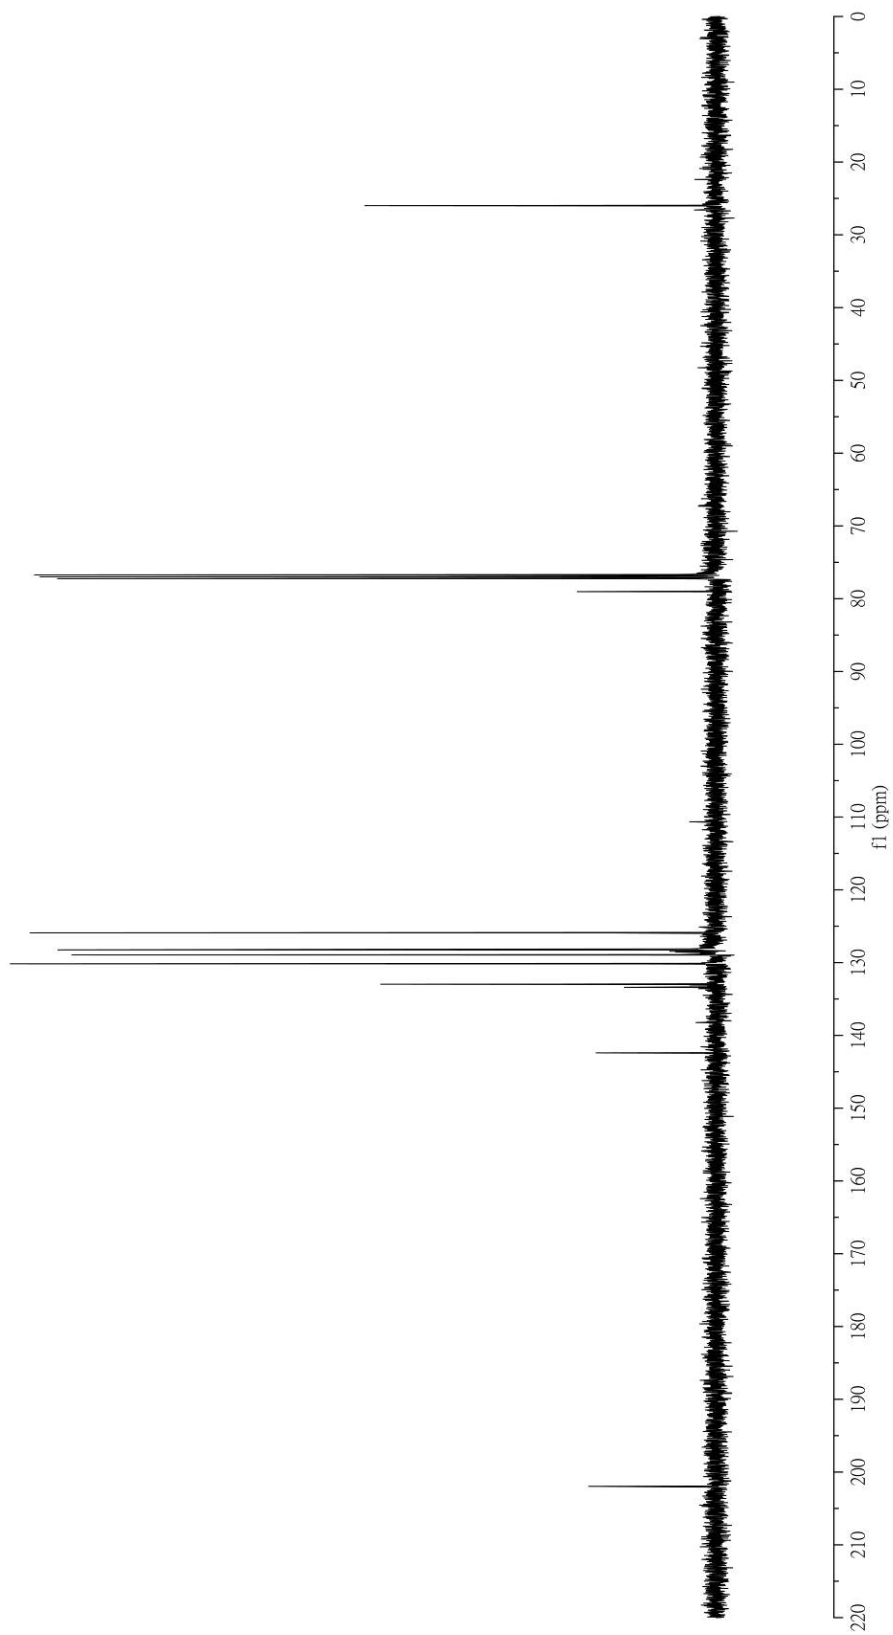

$^{13}\text{C}$  NMR spectrum of **13** in  $\text{CDCl}_3$  at  $23\text{ }^\circ\text{C}$

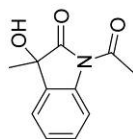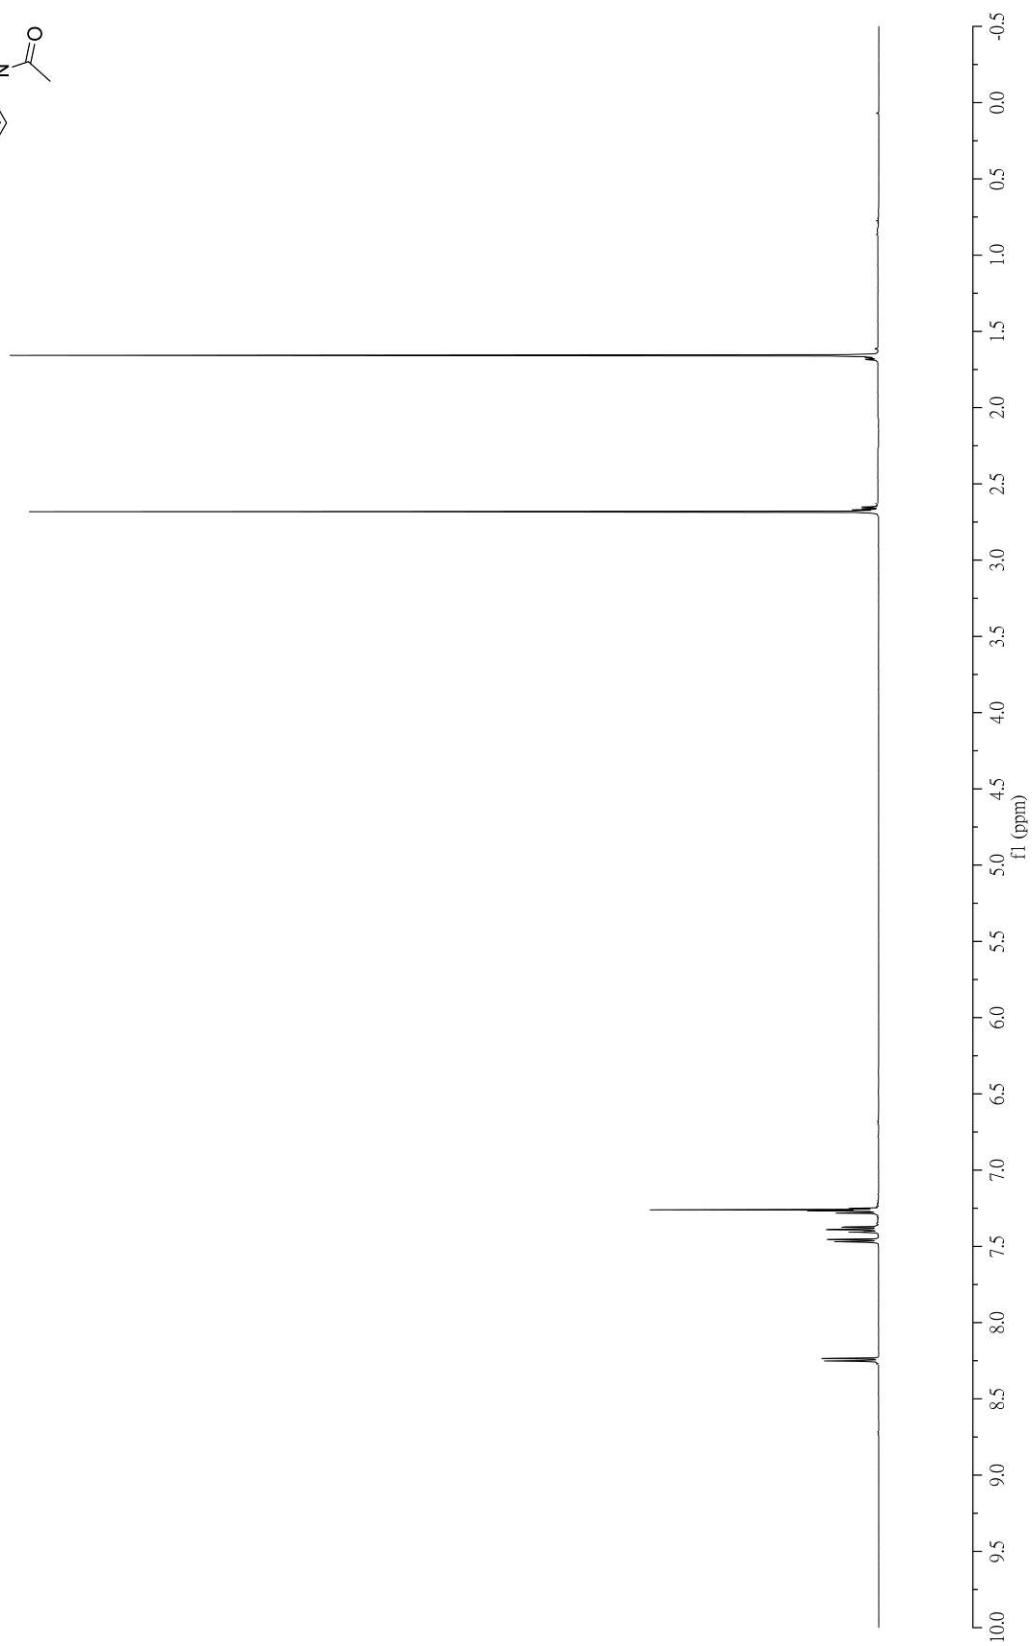

$^1\text{H}$  NMR spectrum of **14** in  $\text{CDCl}_3$  at 23 °C

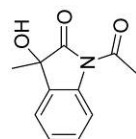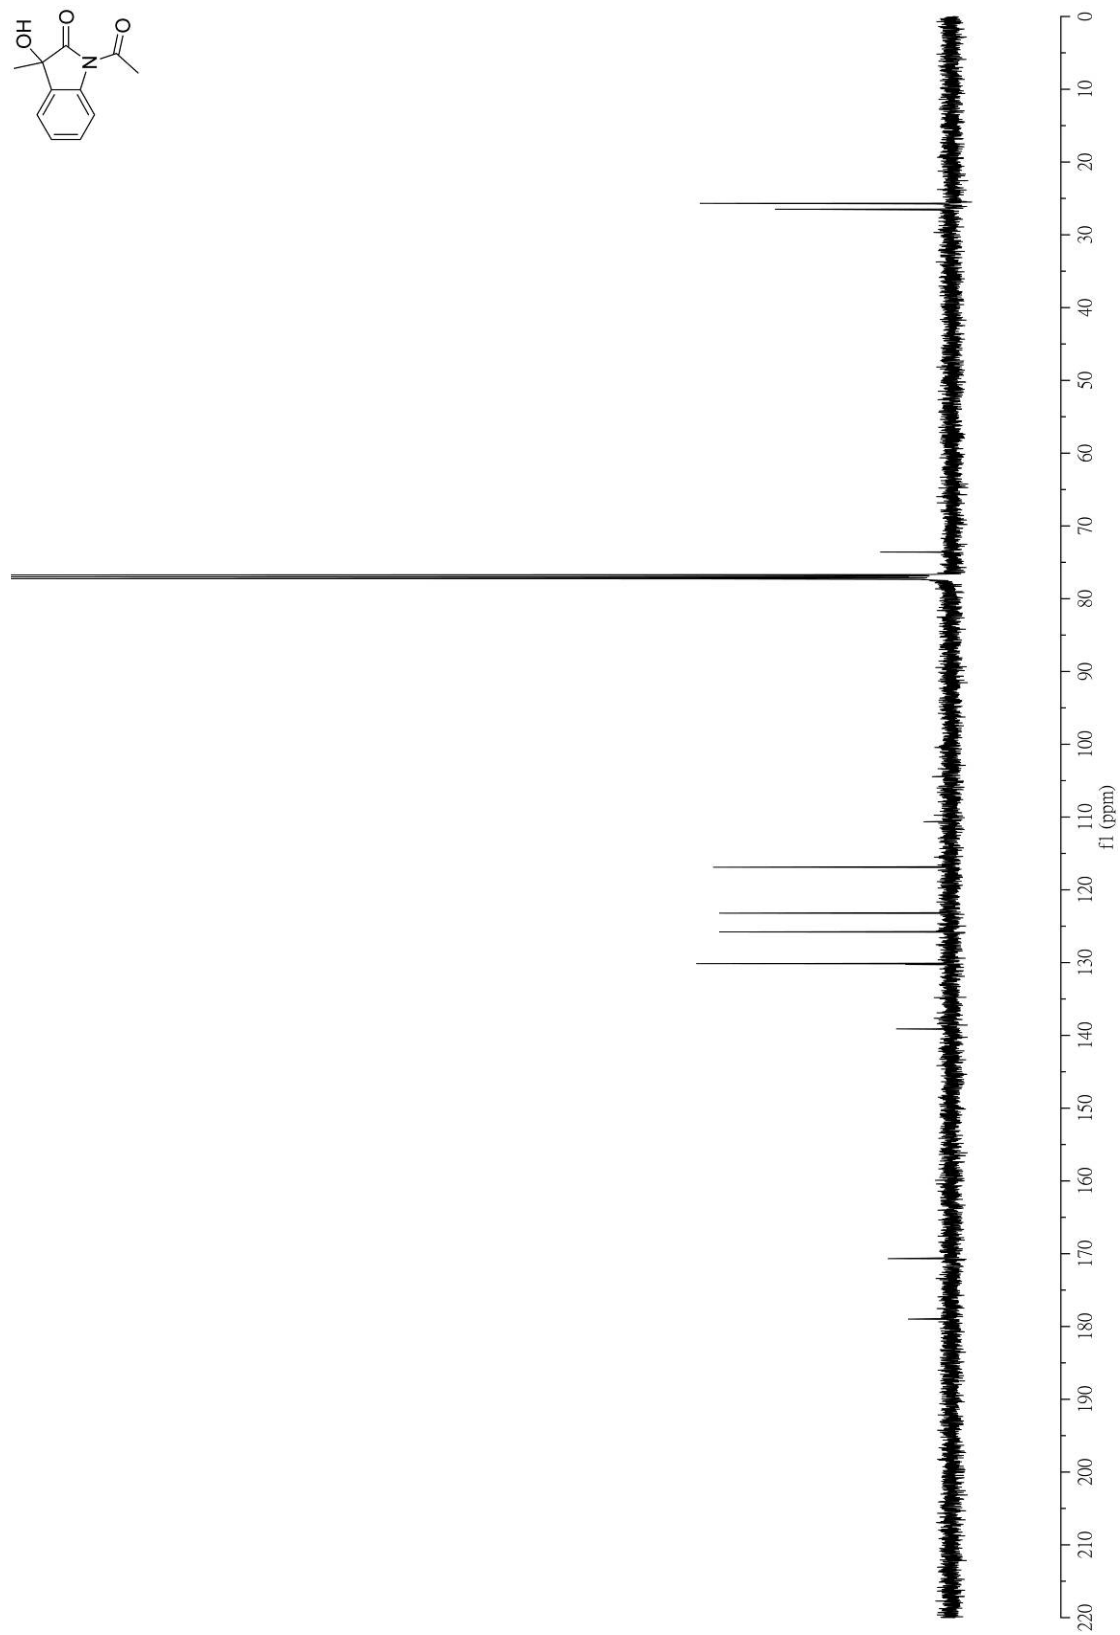

$^{13}\text{C}$  NMR spectrum of **14** in  $\text{CDCl}_3$  at  $23\text{ }^\circ\text{C}$

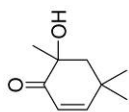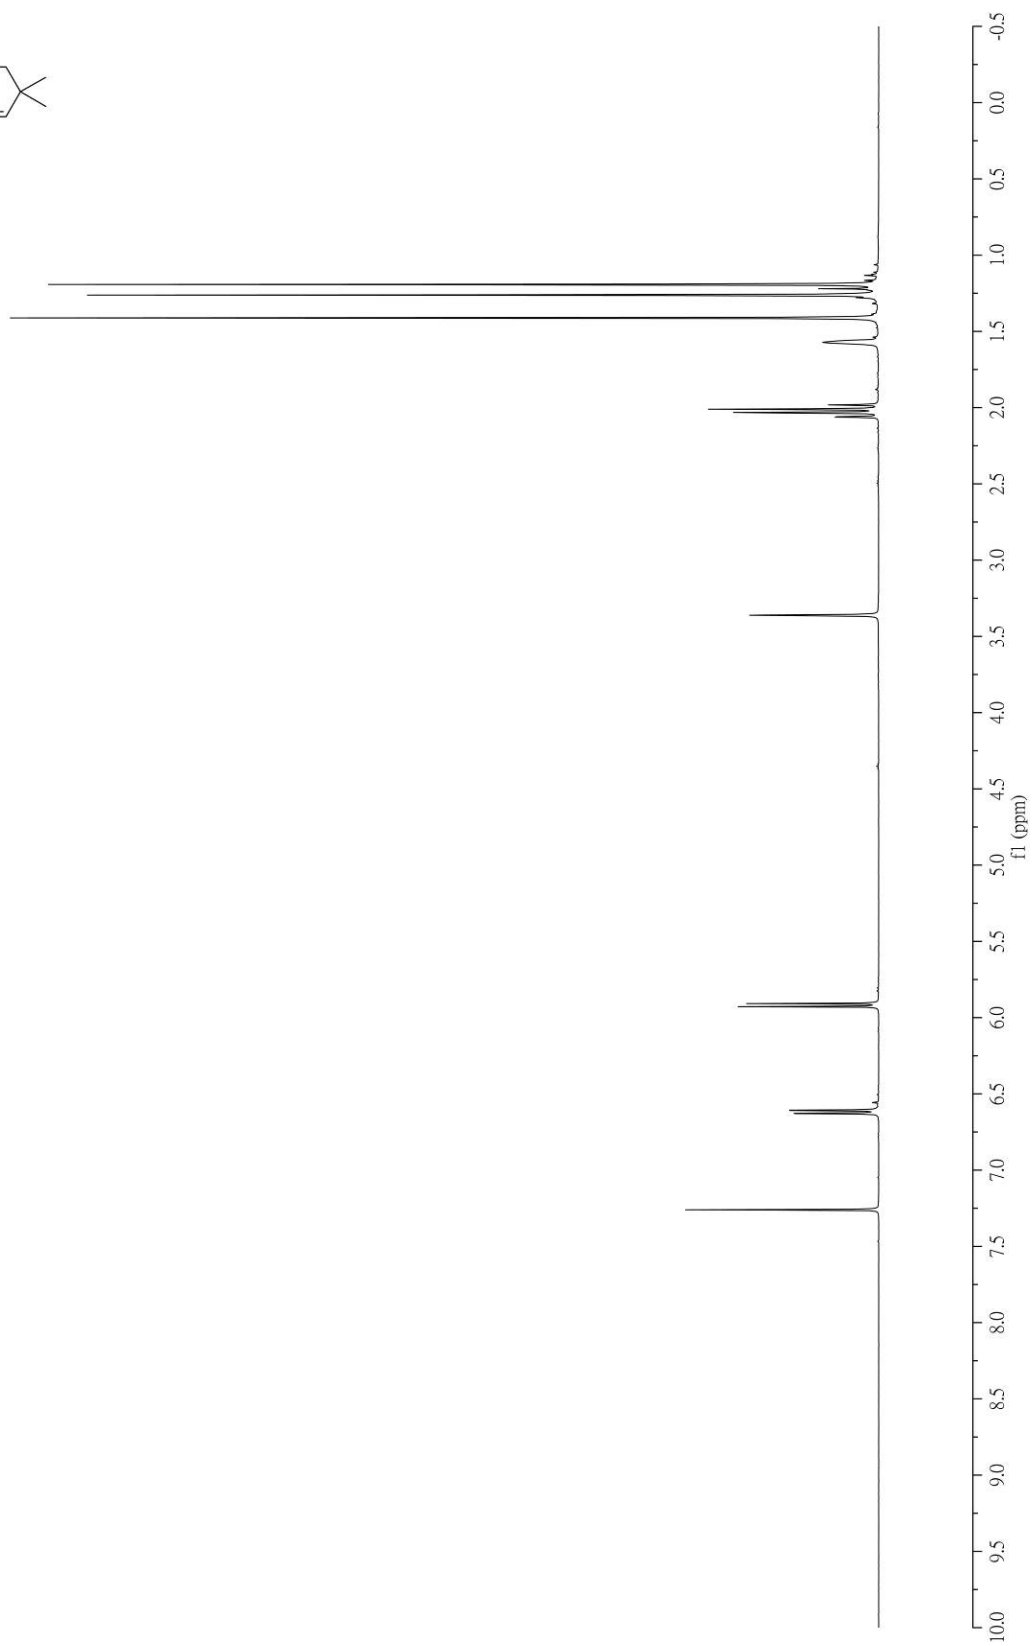

$^1\text{H}$  NMR spectrum of **15** in  $\text{CDCl}_3$  at  $23\text{ }^\circ\text{C}$

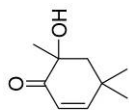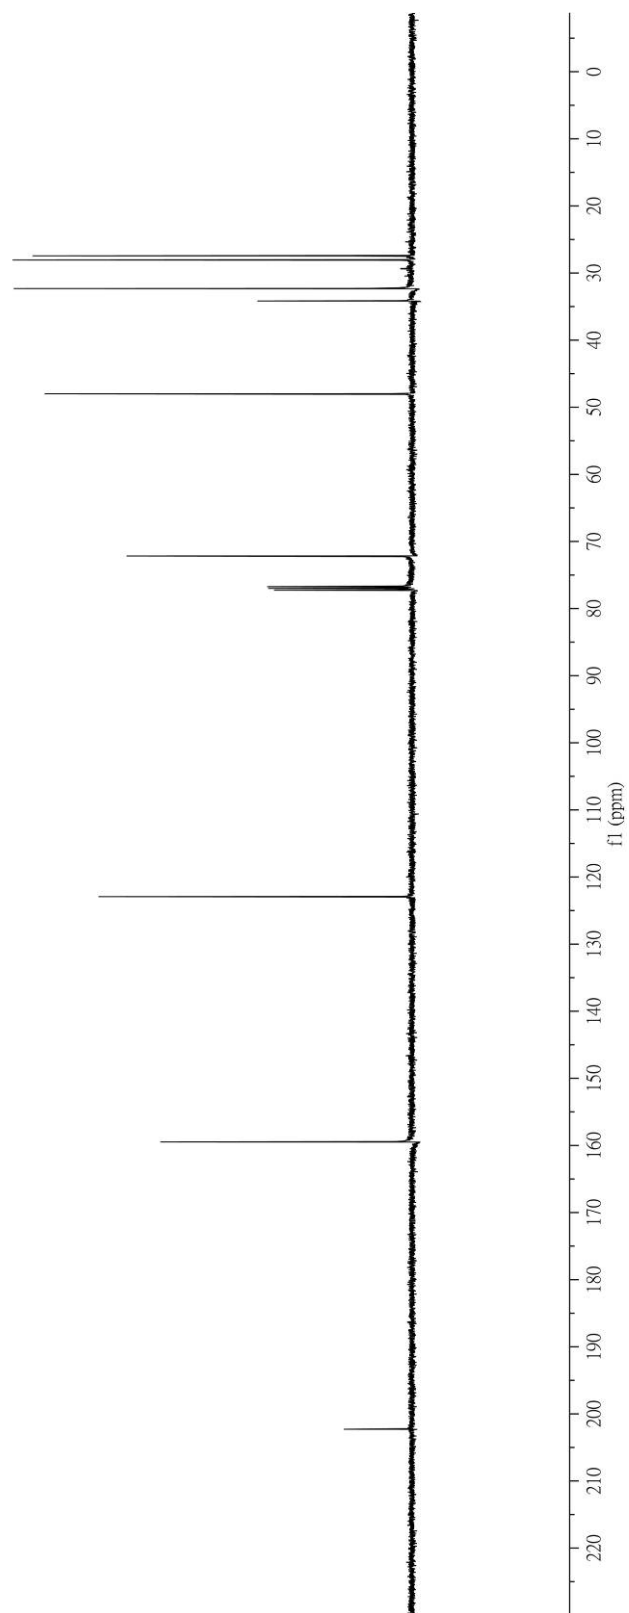

$^{13}\text{C}$  NMR spectrum of **15** in  $\text{CDCl}_3$  at  $23\text{ }^\circ\text{C}$

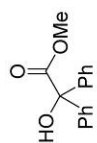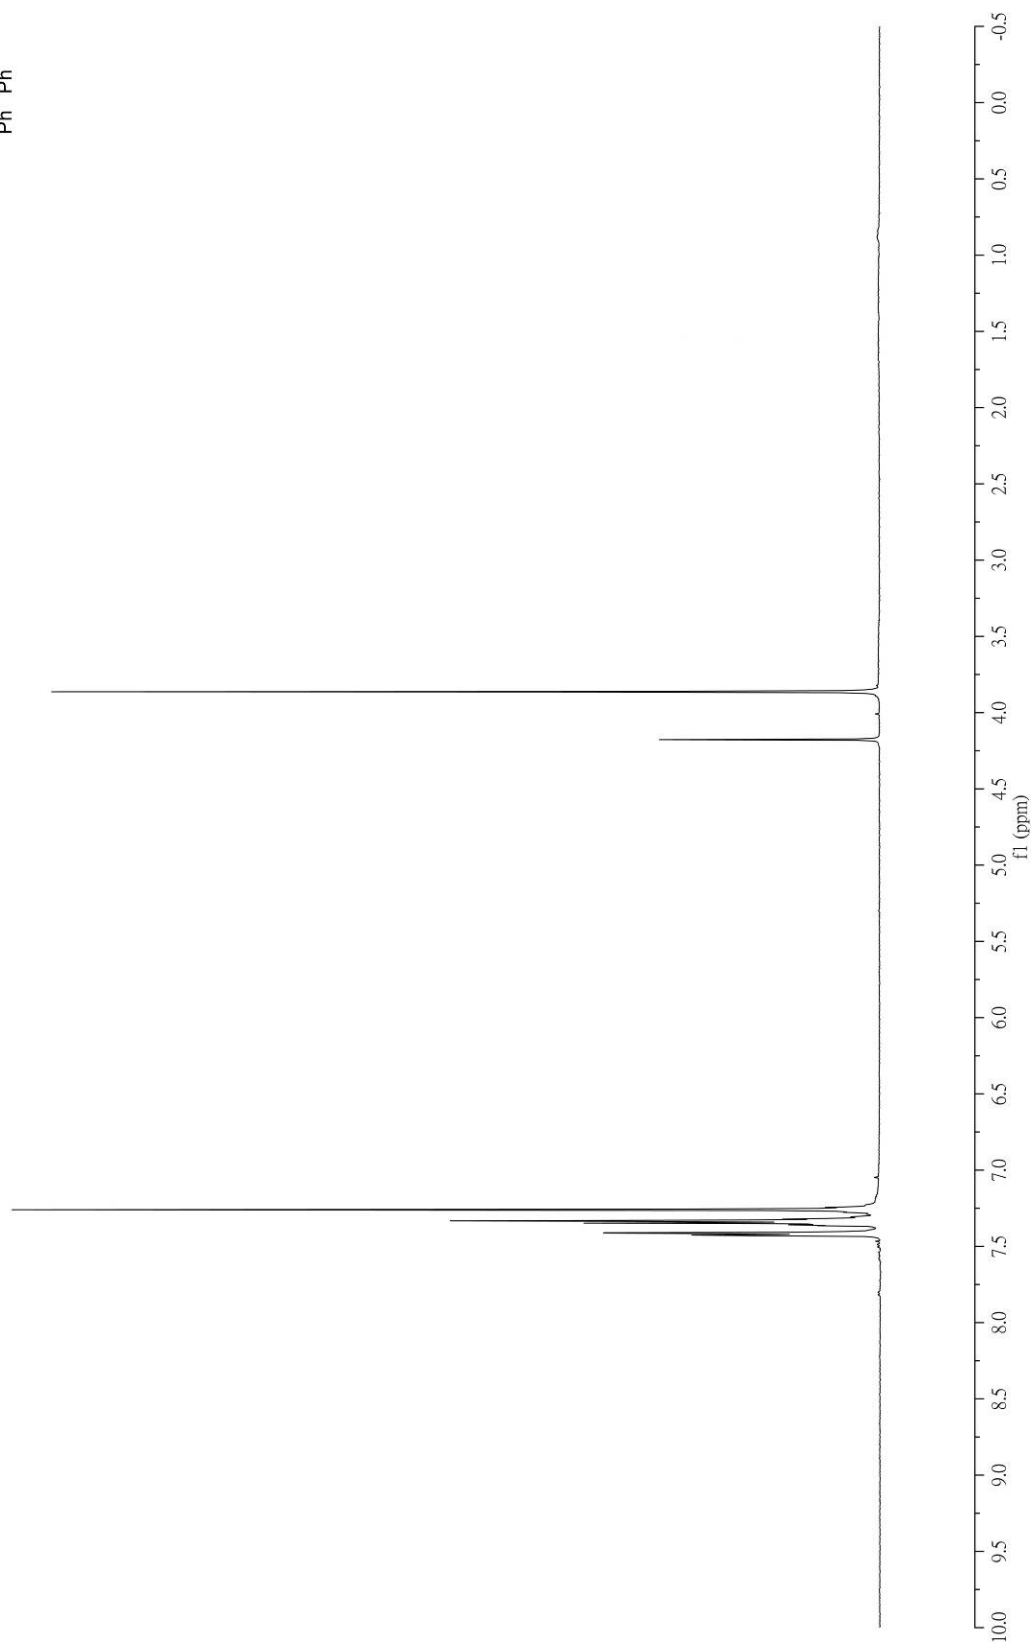

$^1\text{H}$  NMR spectrum of **16** in  $\text{CDCl}_3$  at  $23\text{ }^\circ\text{C}$



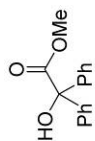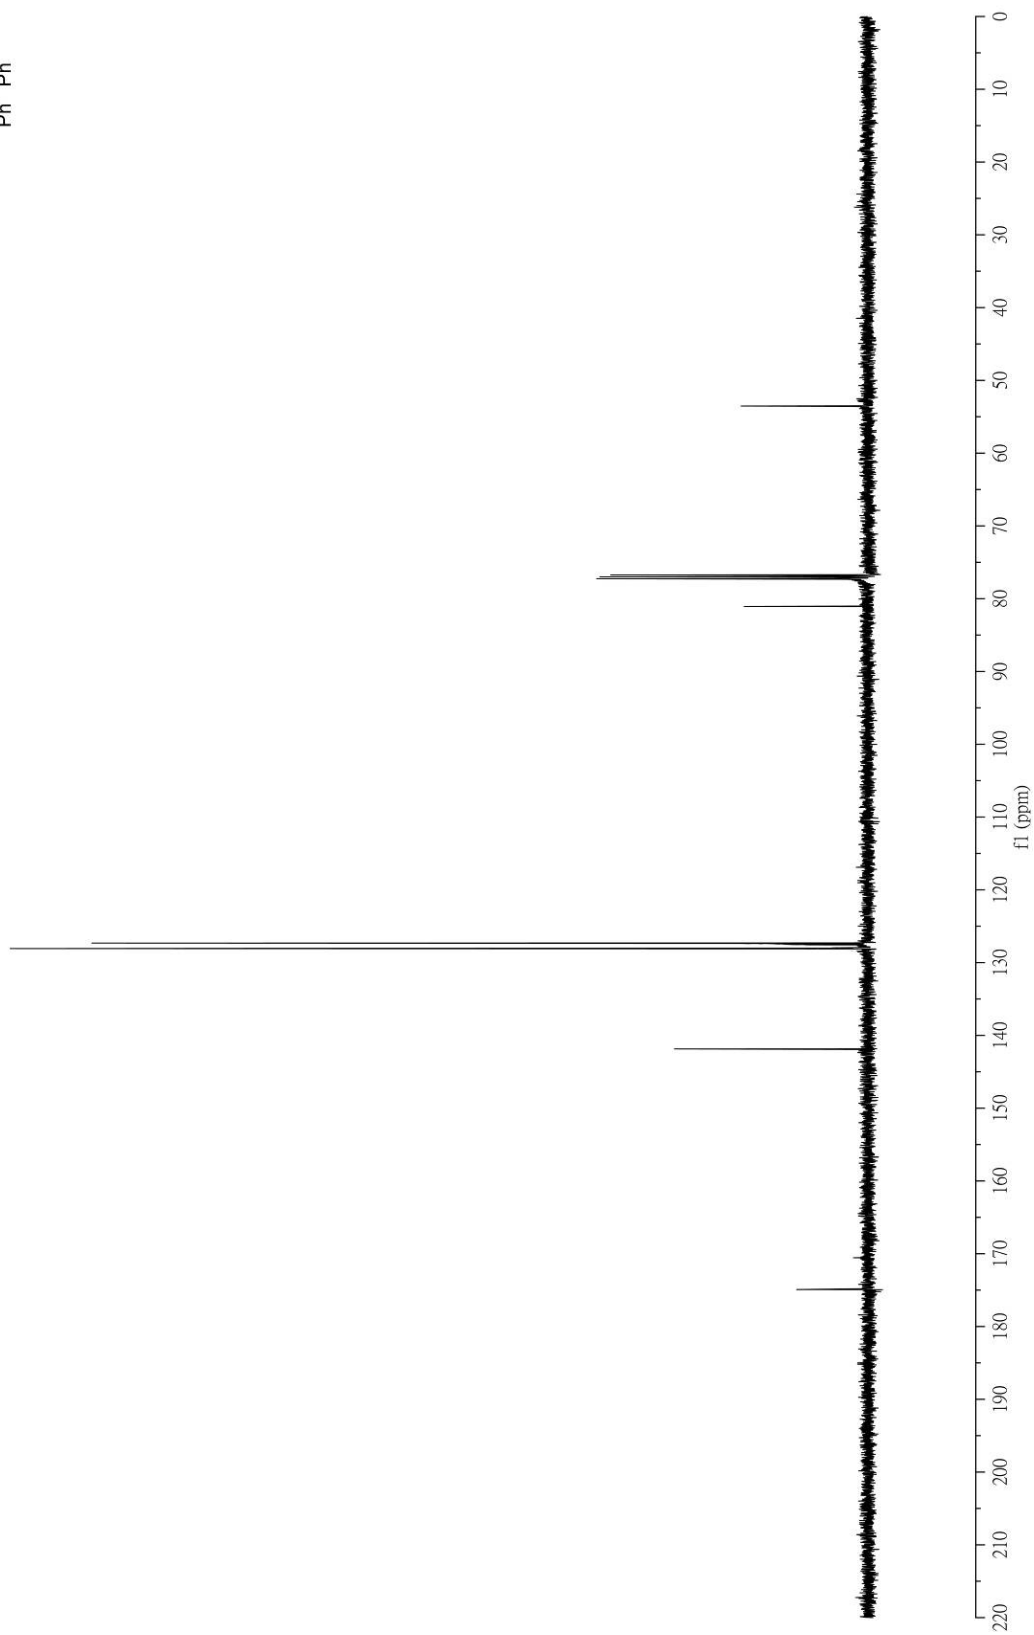

$^{13}\text{C}$  NMR spectrum of **16** in  $\text{CDCl}_3$  at  $23\text{ }^\circ\text{C}$

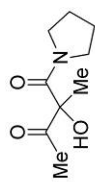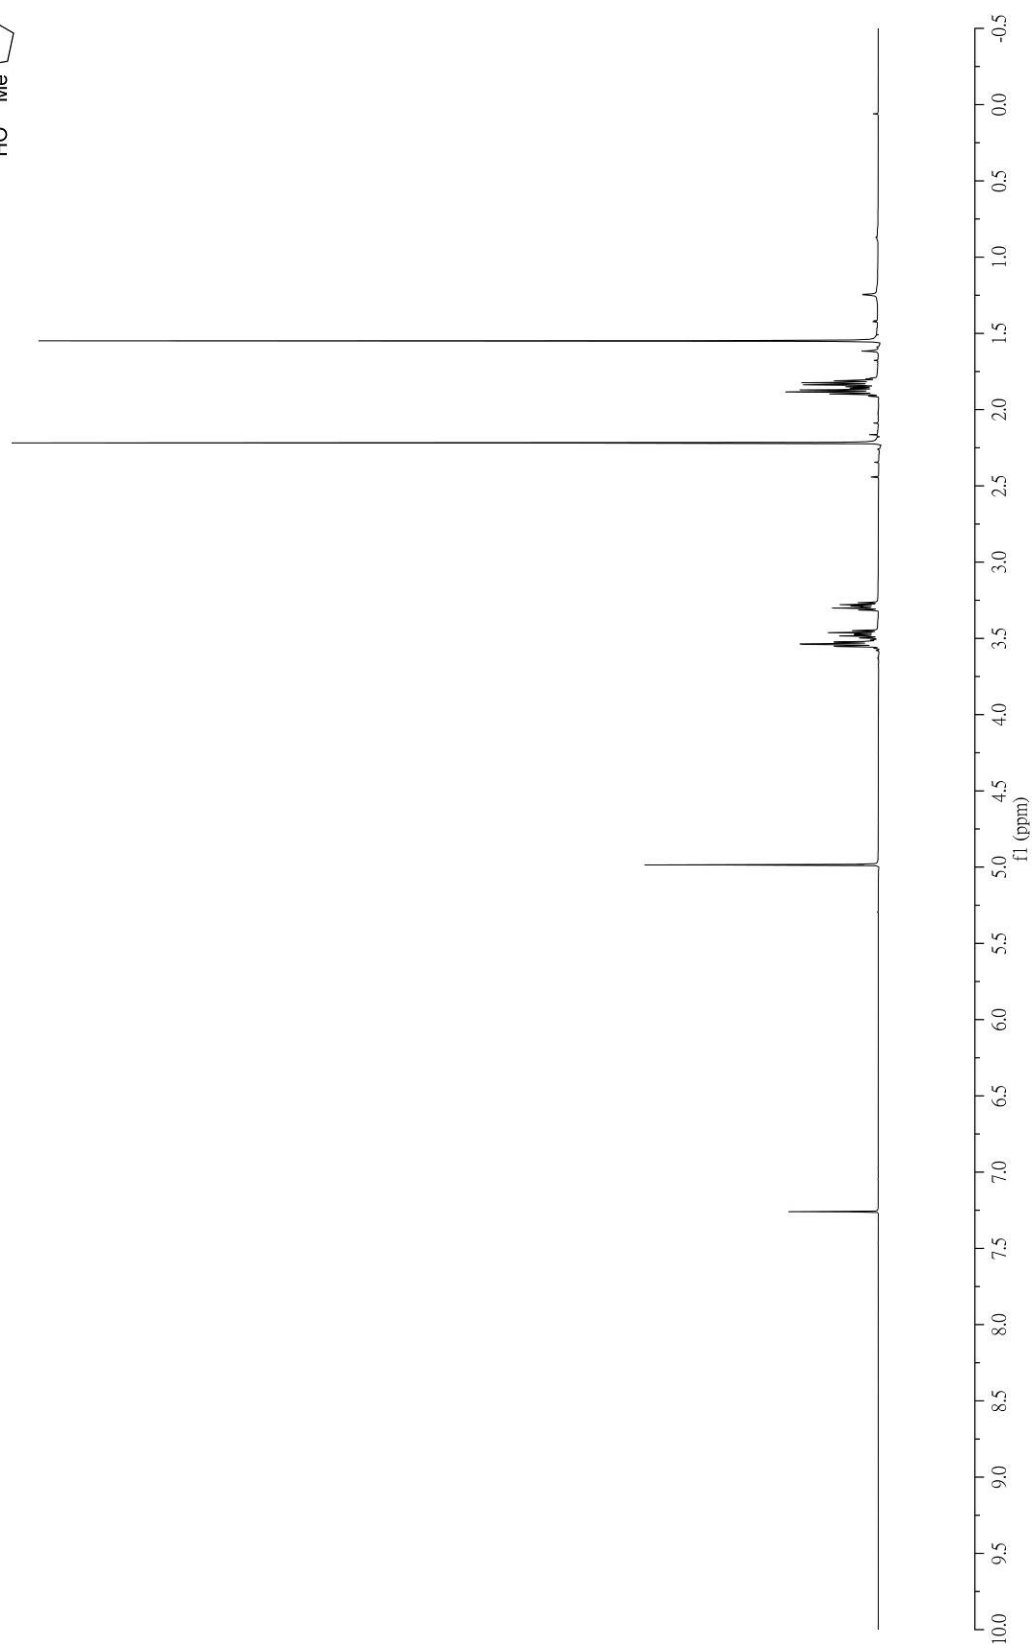

$^1\text{H}$  NMR spectrum of **17** in  $\text{CDCl}_3$  at 23 °C

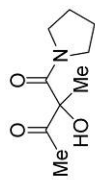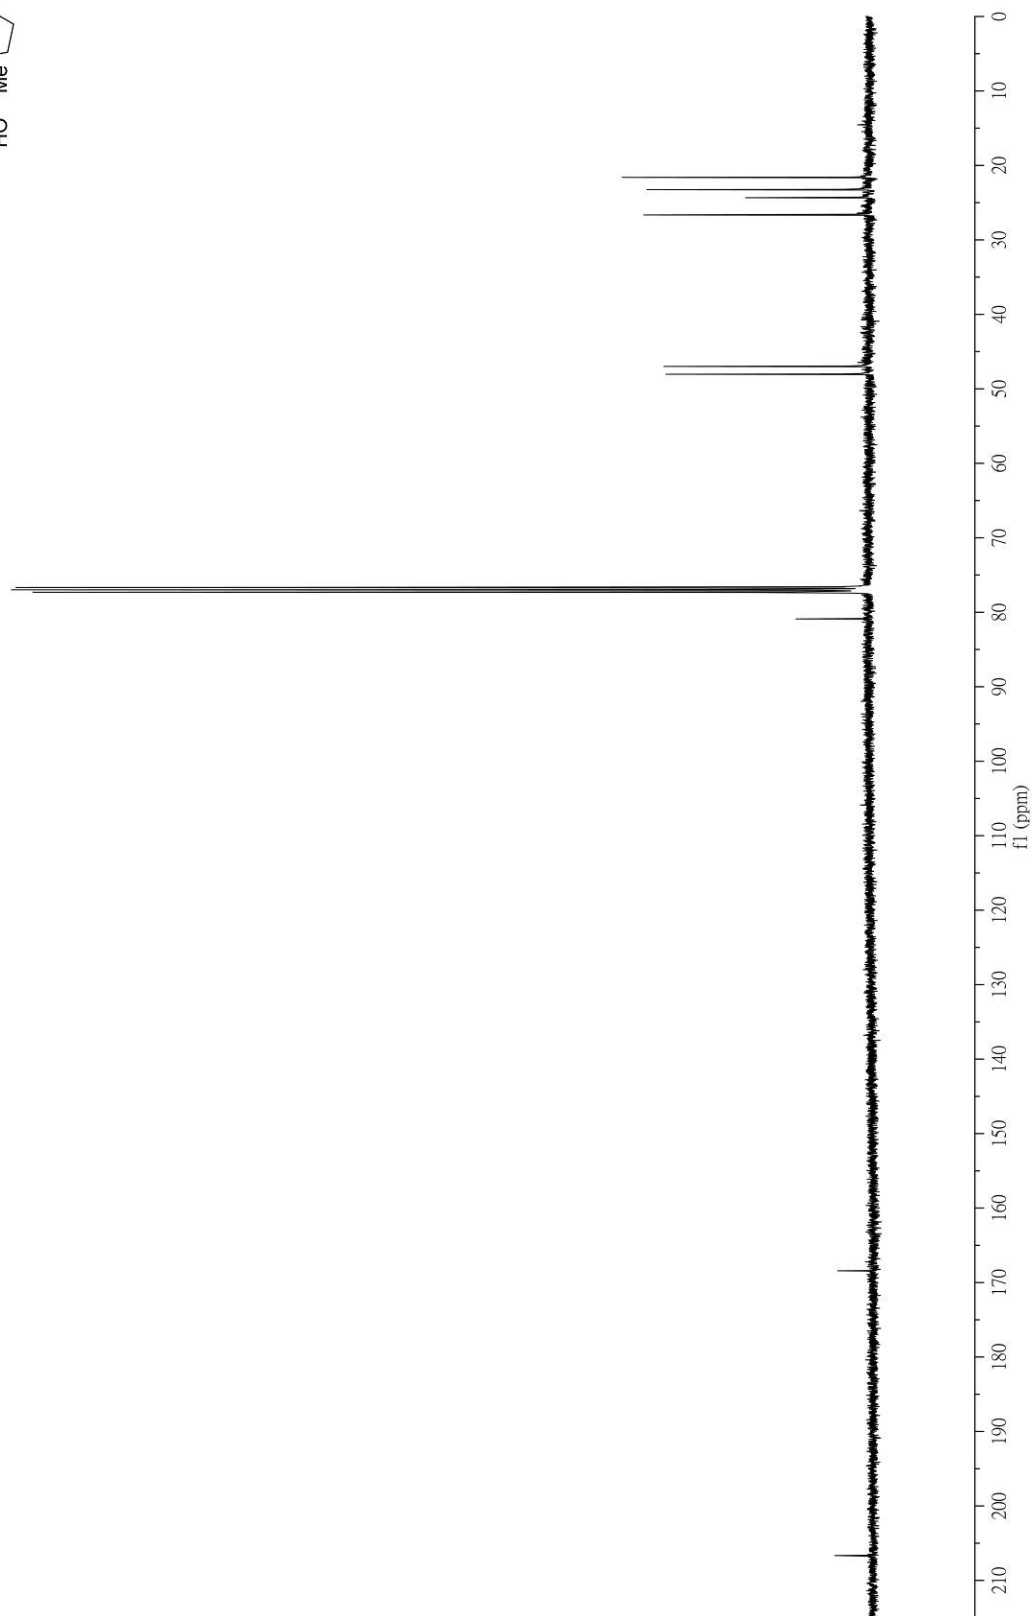

$^{13}\text{C}$  NMR spectrum of 17 in  $\text{CDCl}_3$  at 23 °C

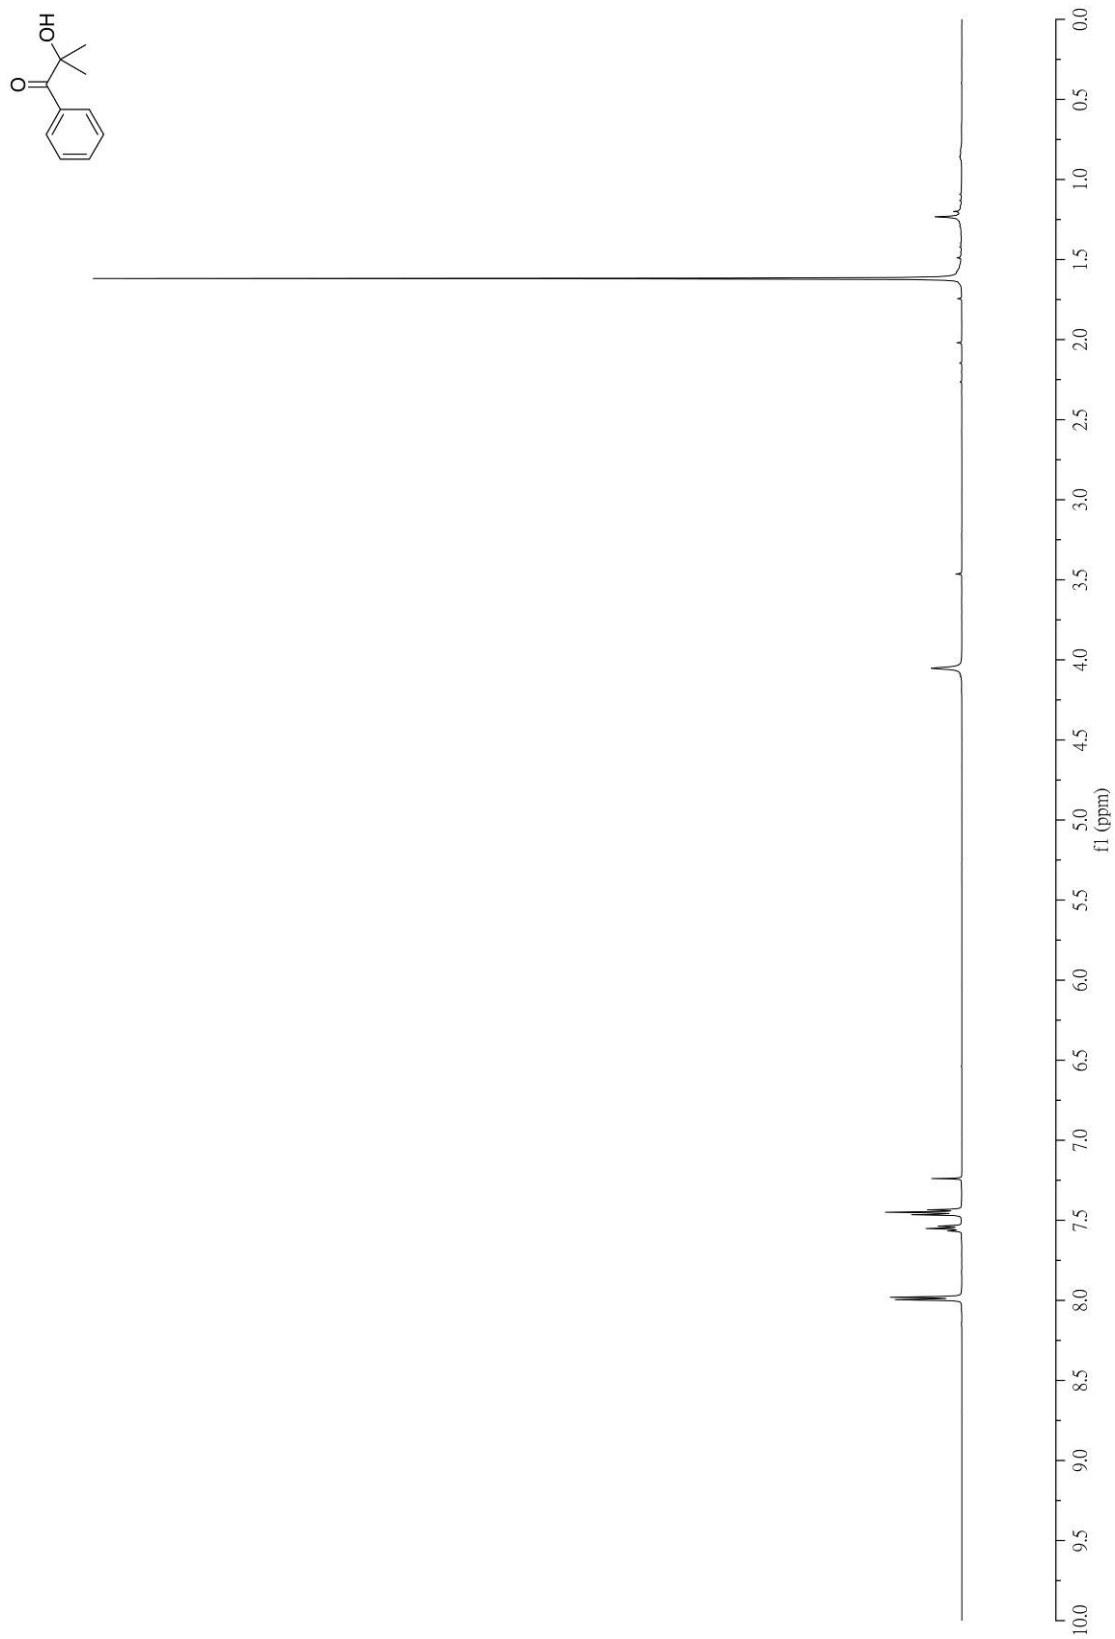 $^1\text{H}$  NMR spectrum of **18** in  $\text{CDCl}_3$  at  $23\text{ }^\circ\text{C}$

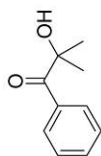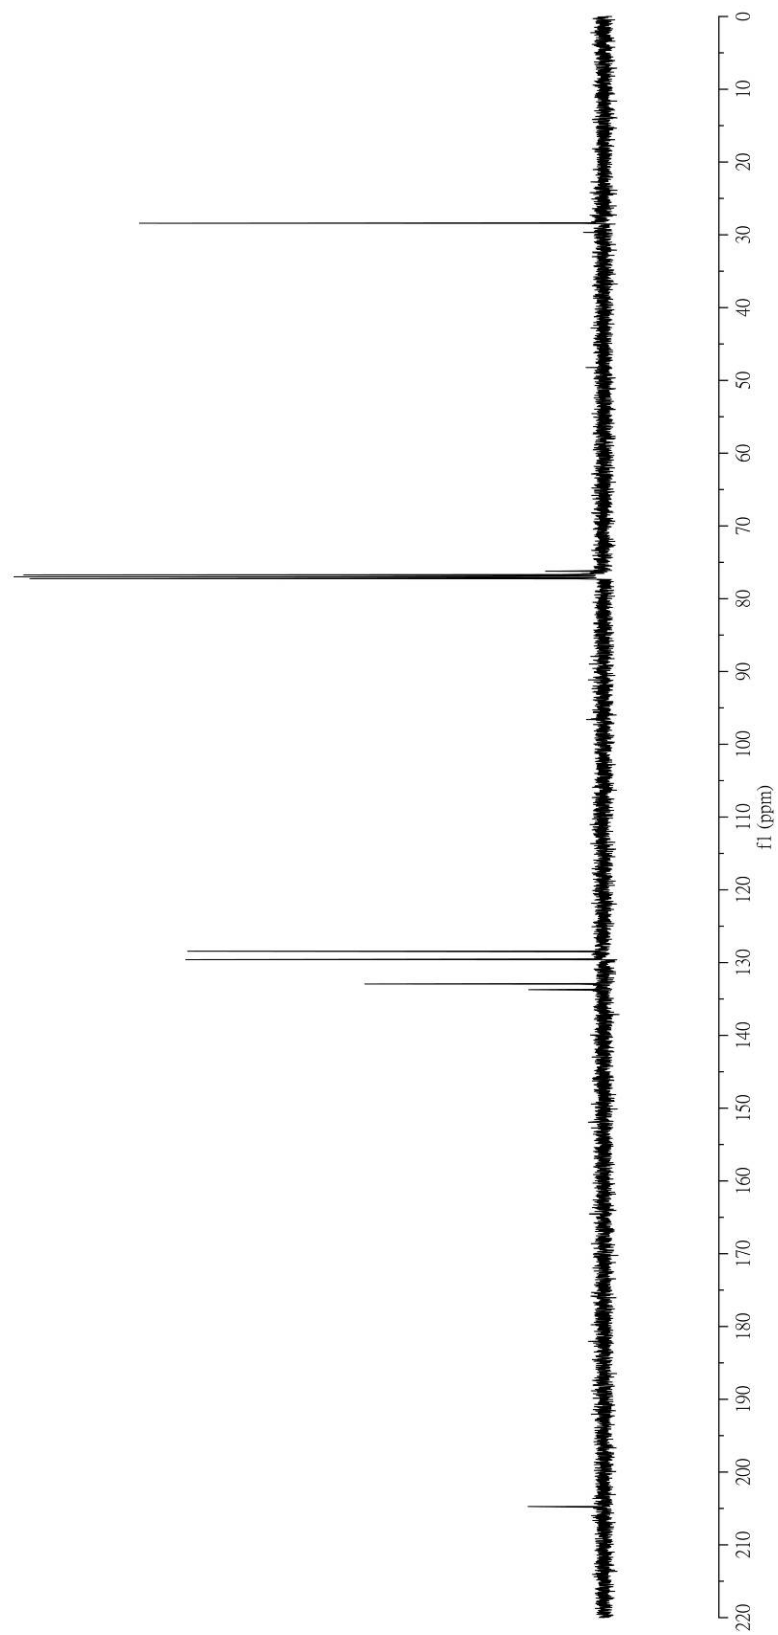

$^{13}\text{C}$  NMR spectrum of **18** in  $\text{CDCl}_3$  at  $23\text{ }^\circ\text{C}$

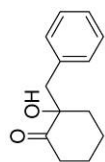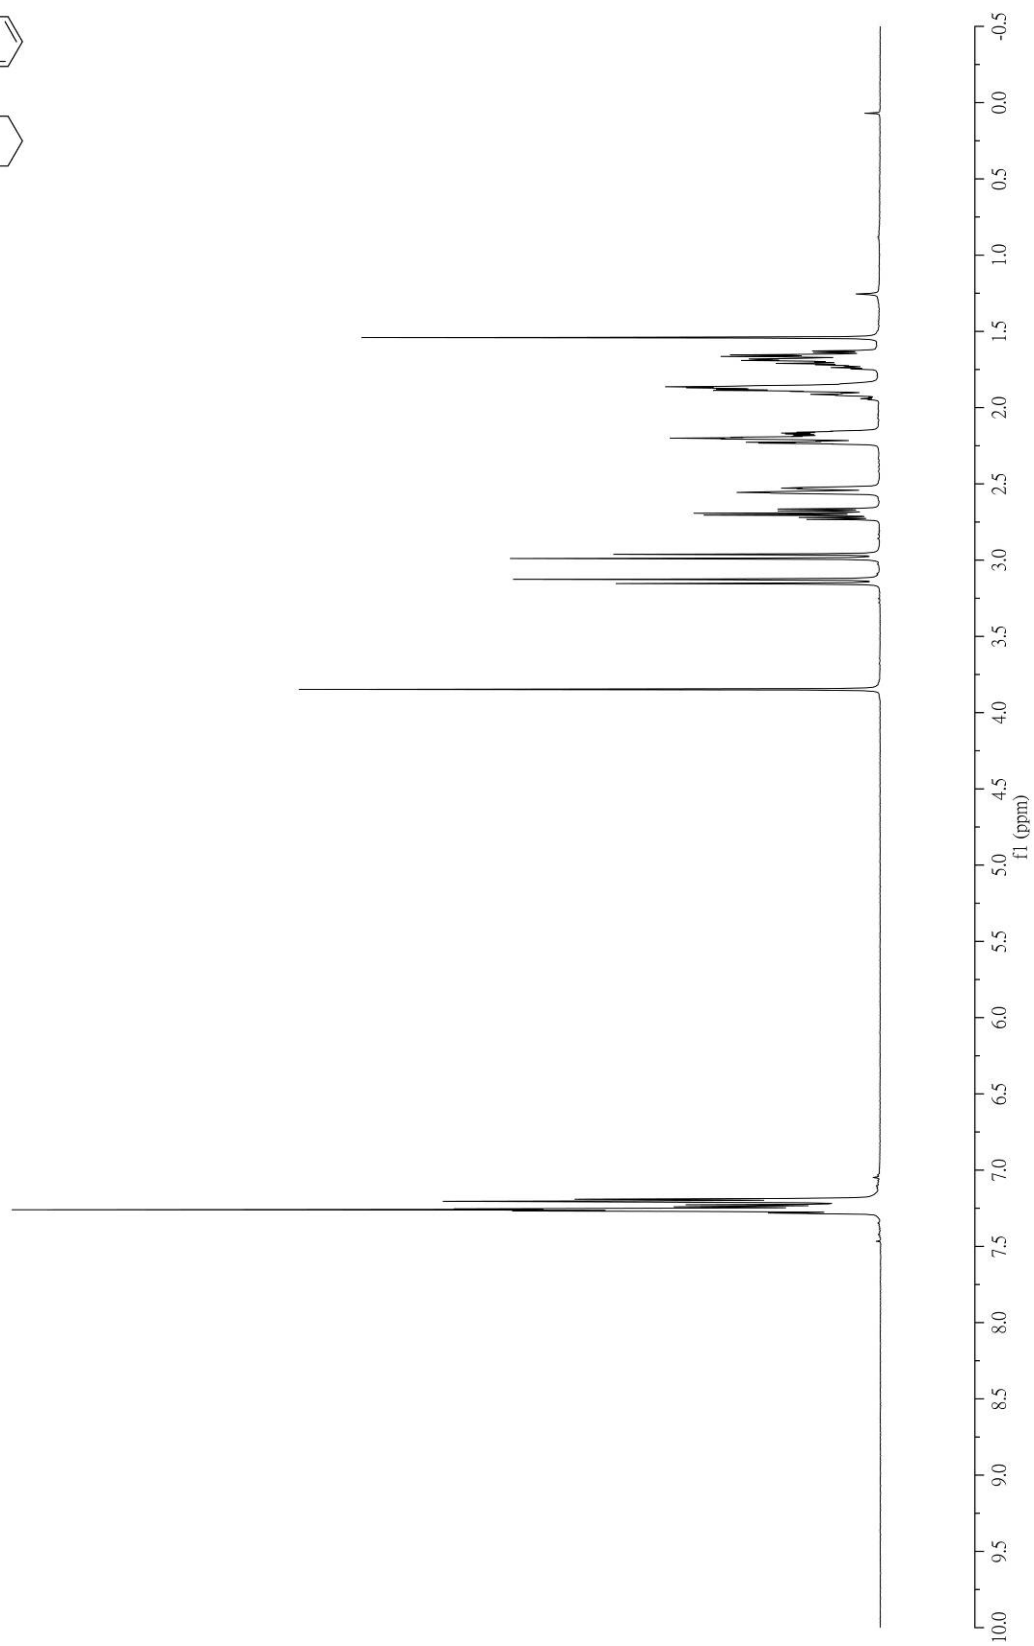

$^1\text{H}$  NMR spectrum of **19** in  $\text{CDCl}_3$  at  $23\text{ }^\circ\text{C}$

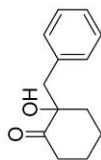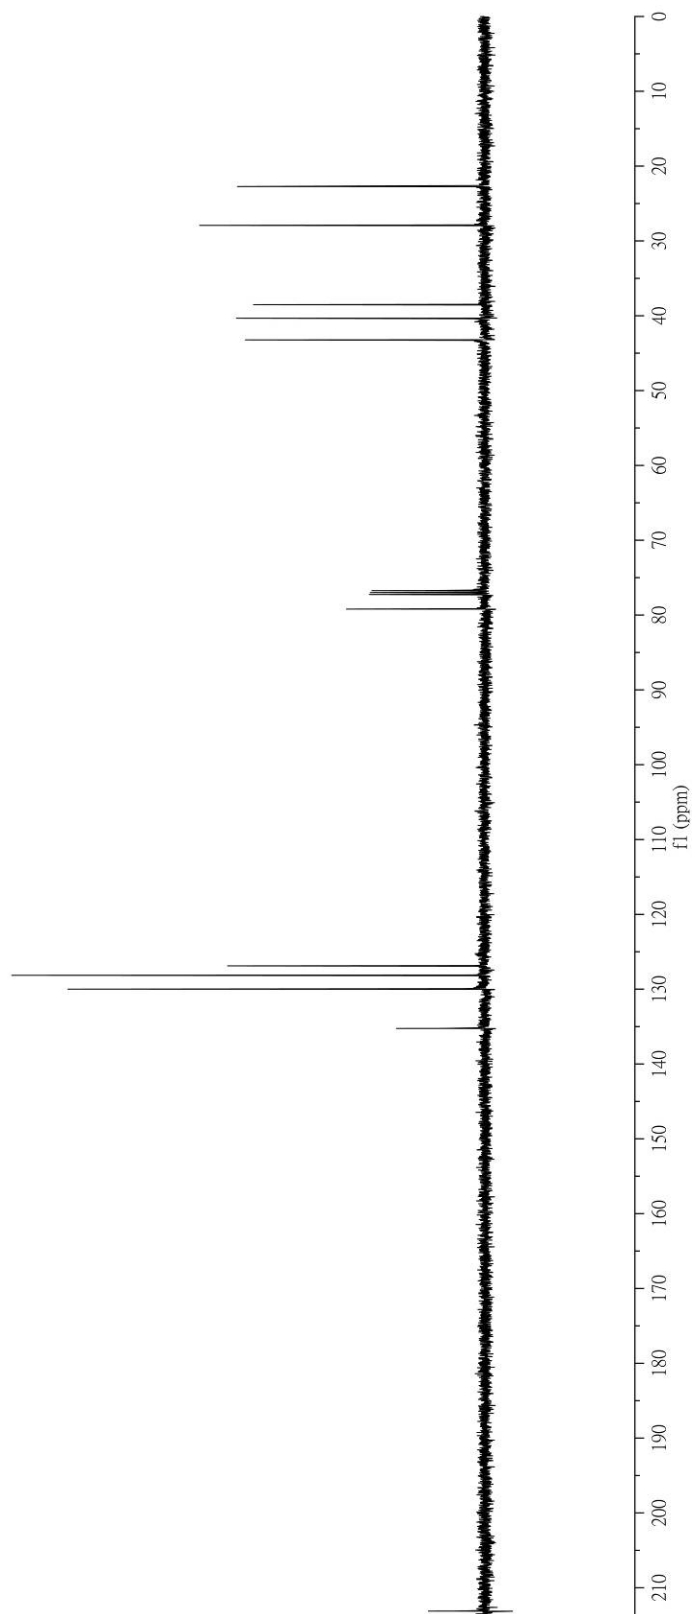

<sup>13</sup>C NMR spectrum of **19** in CDCl<sub>3</sub> at 23 °C

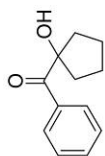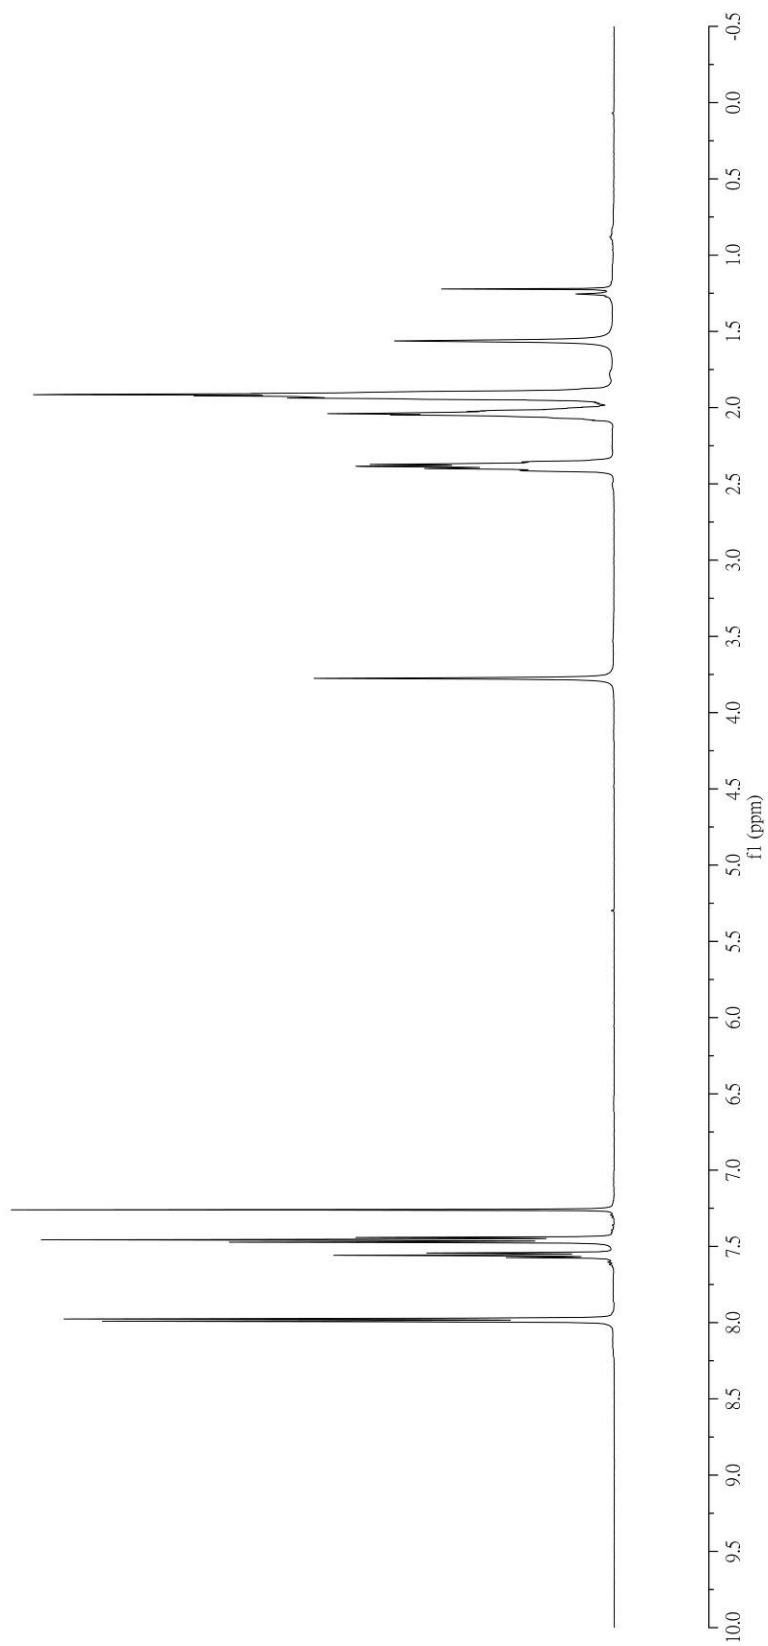

<sup>1</sup>H NMR spectrum of **20** in CDCl<sub>3</sub> at 23 °C



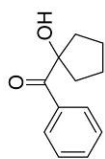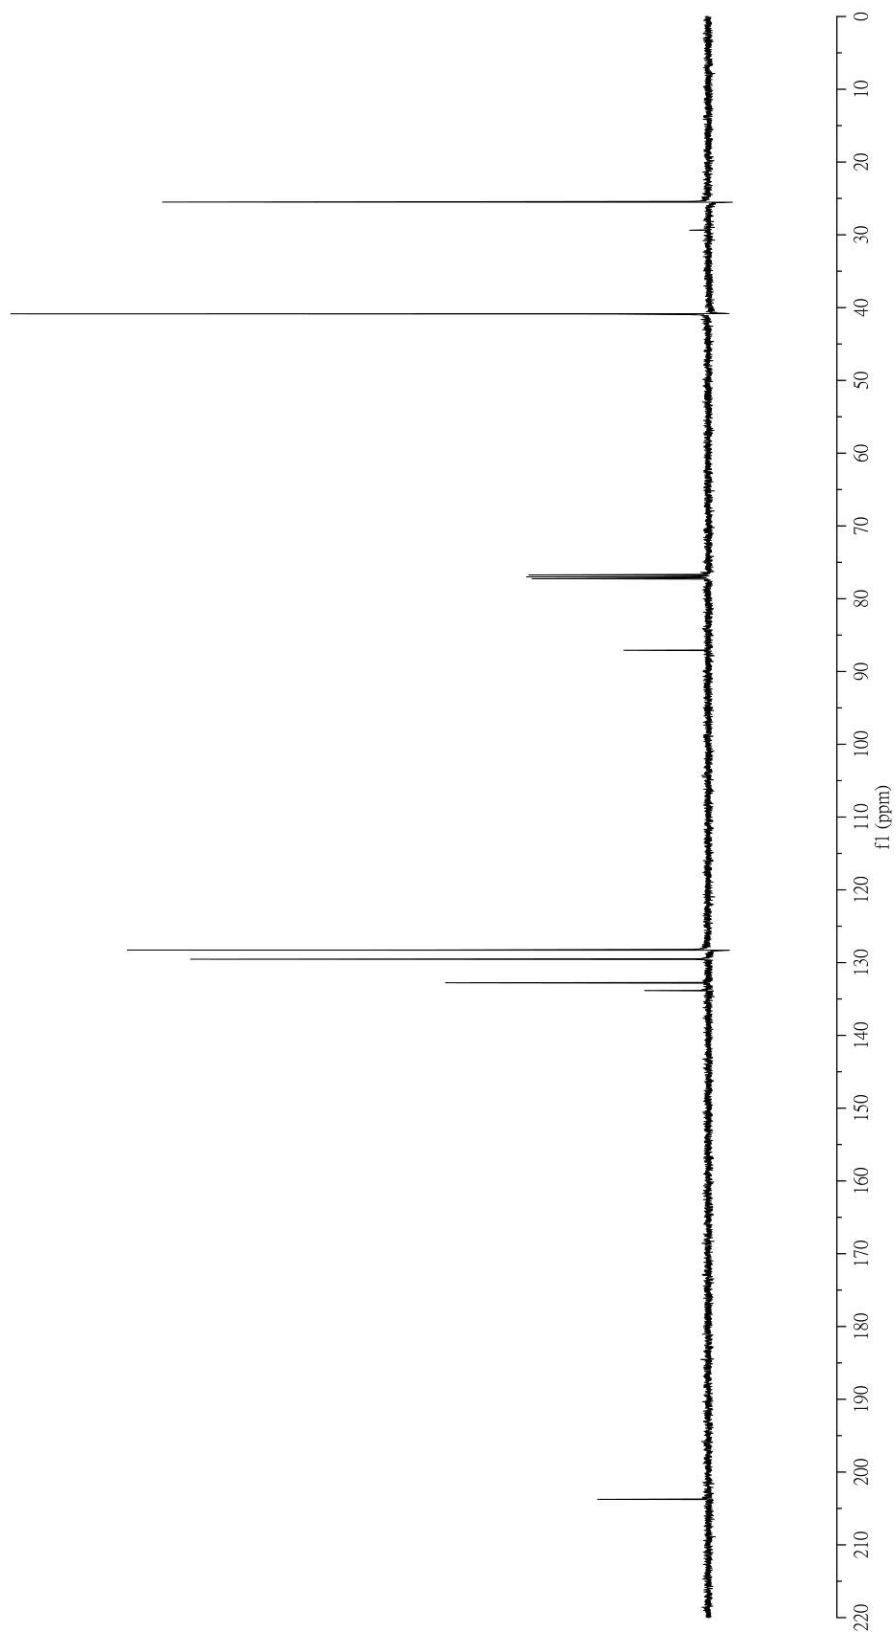

<sup>13</sup>C NMR spectrum of **20** in CDCl<sub>3</sub> at 23 °C

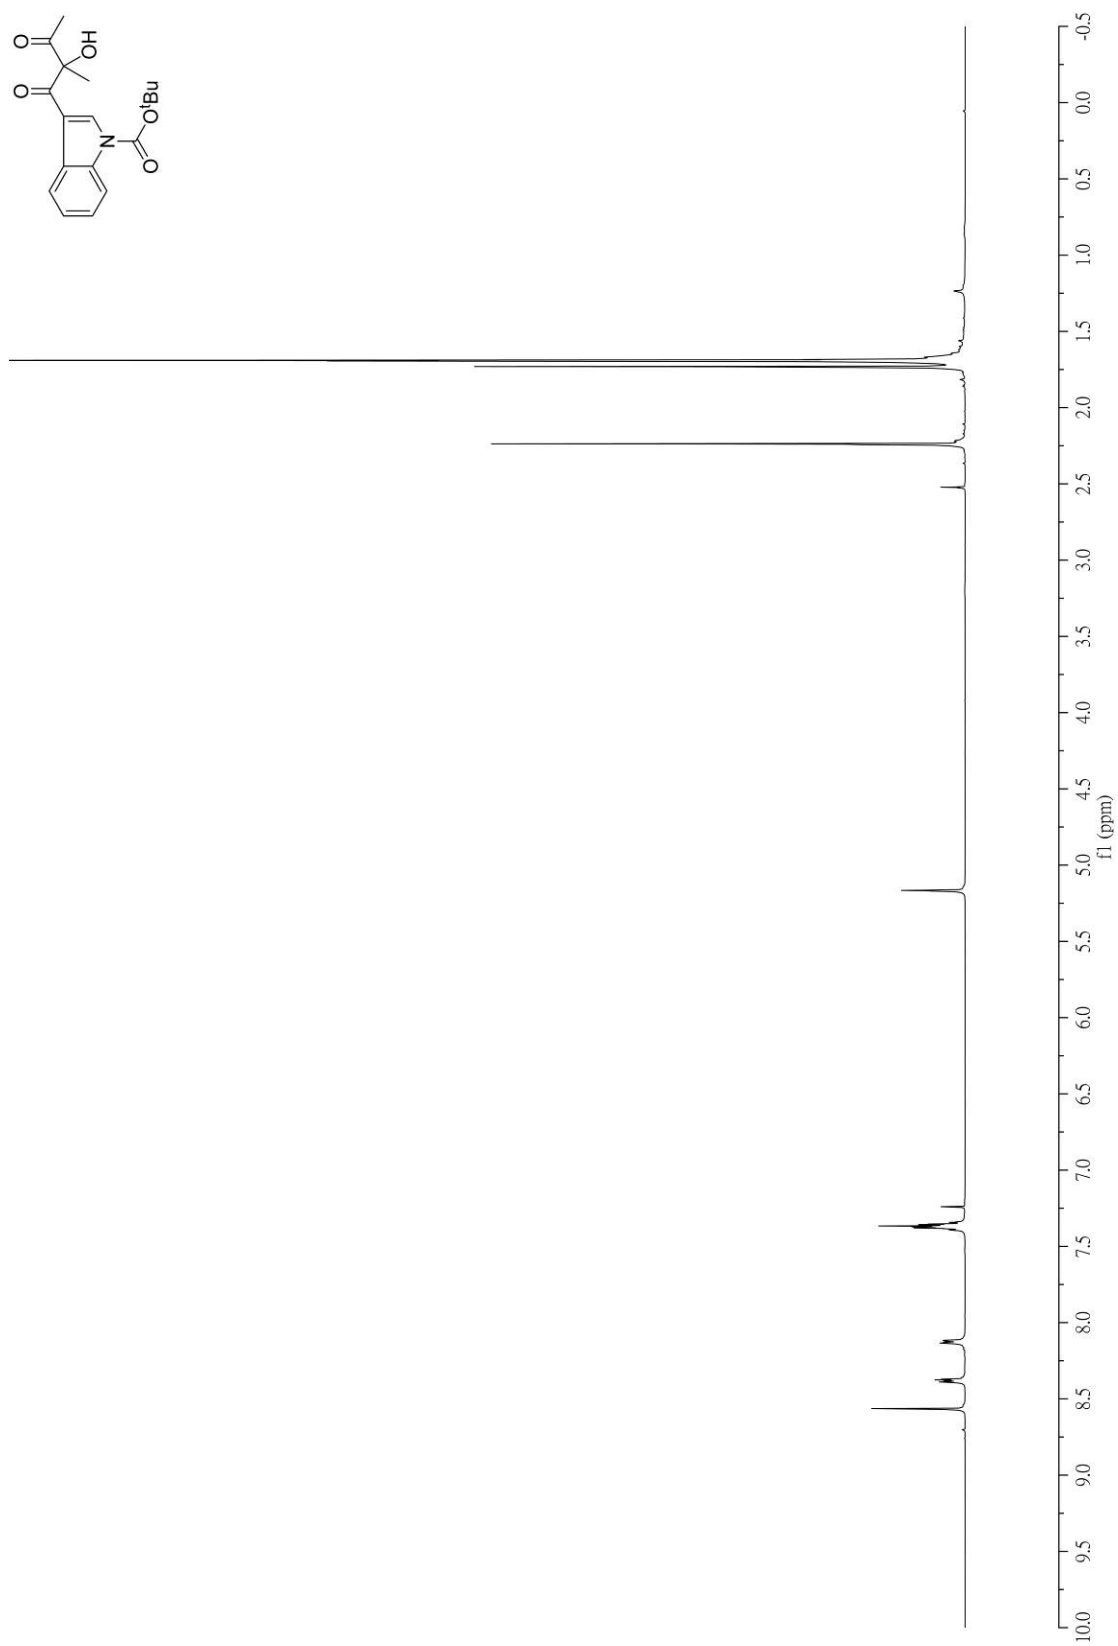

$^1\text{H}$  NMR spectrum of **21** in  $\text{CDCl}_3$  at  $23\text{ }^\circ\text{C}$

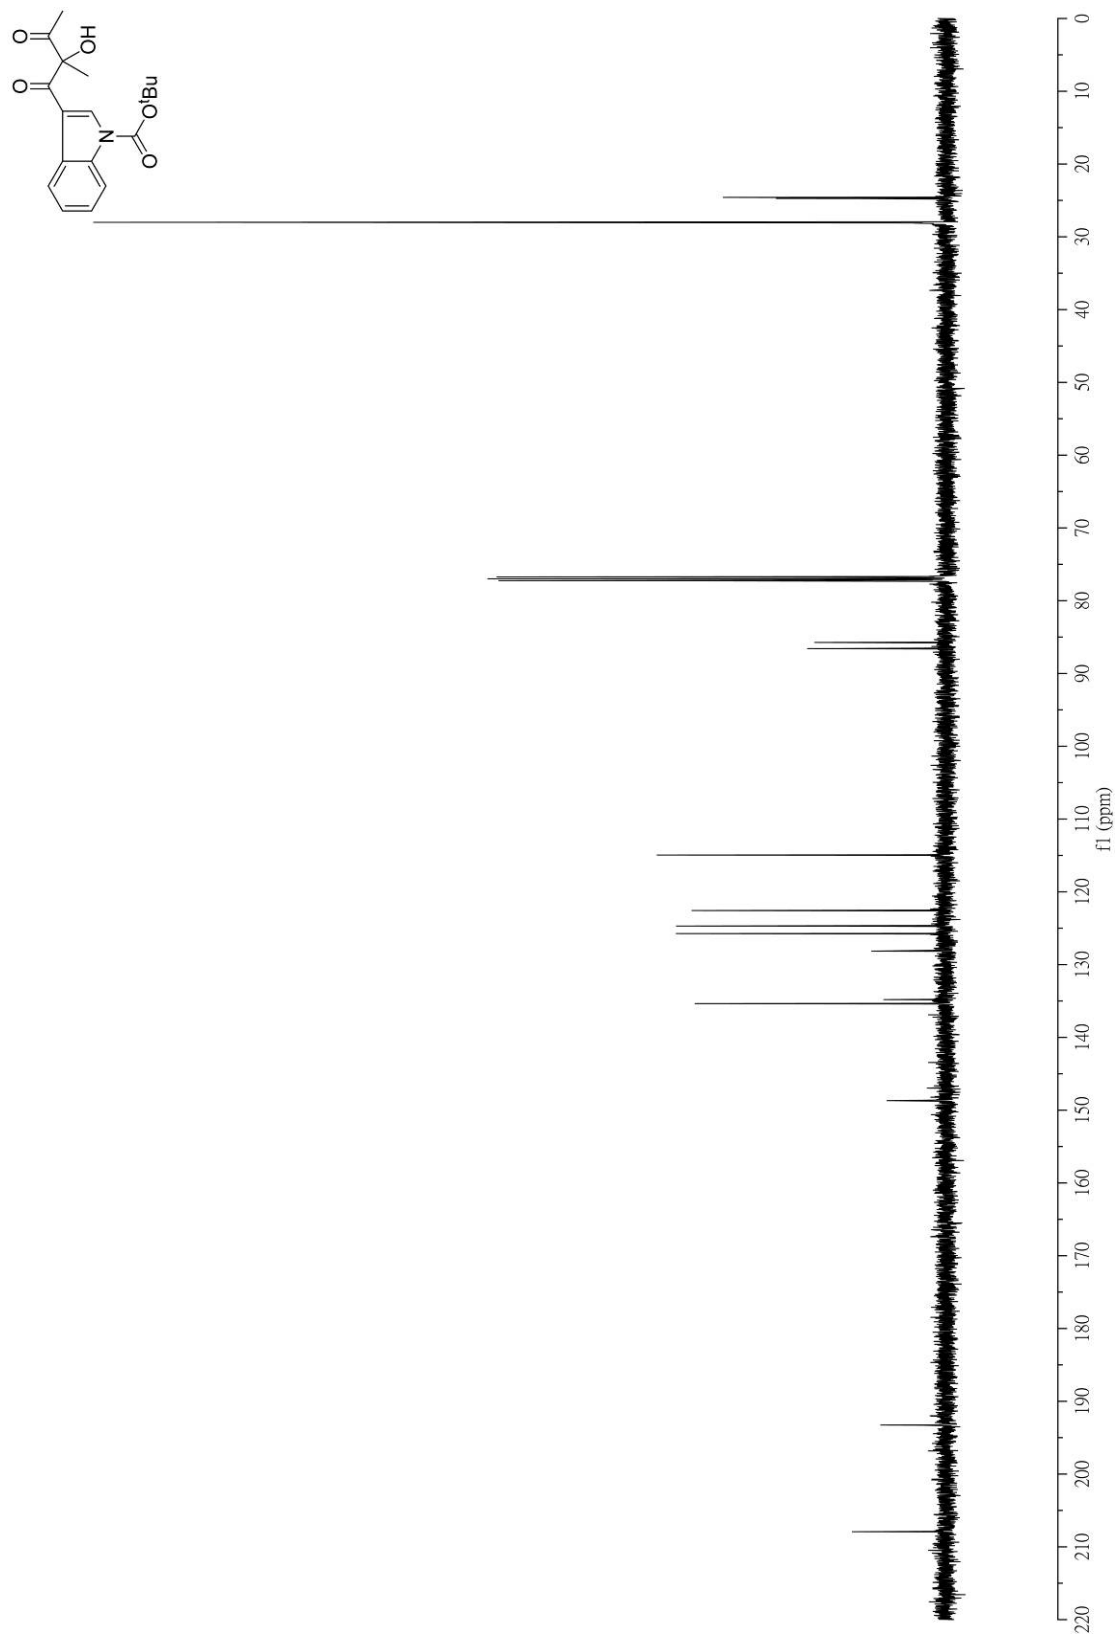

$^{13}\text{C}$  NMR spectrum of **21** in  $\text{CDCl}_3$  at  $23\text{ }^\circ\text{C}$

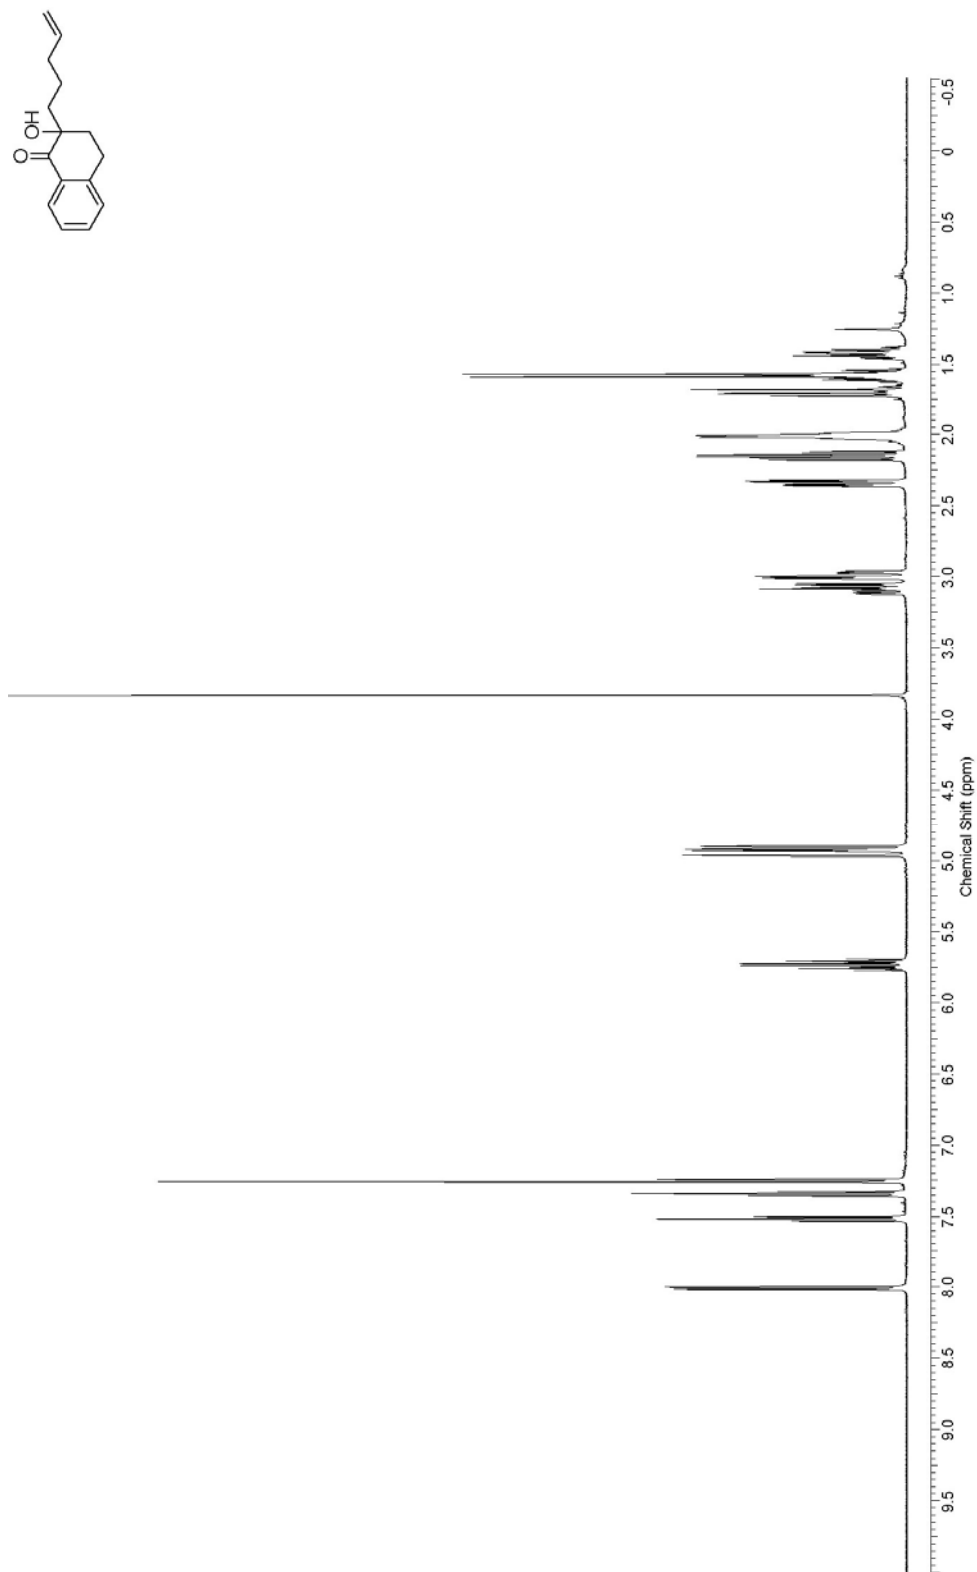

$^1\text{H}$  NMR spectrum of **22** in  $\text{CDCl}_3$  at  $23\text{ }^\circ\text{C}$

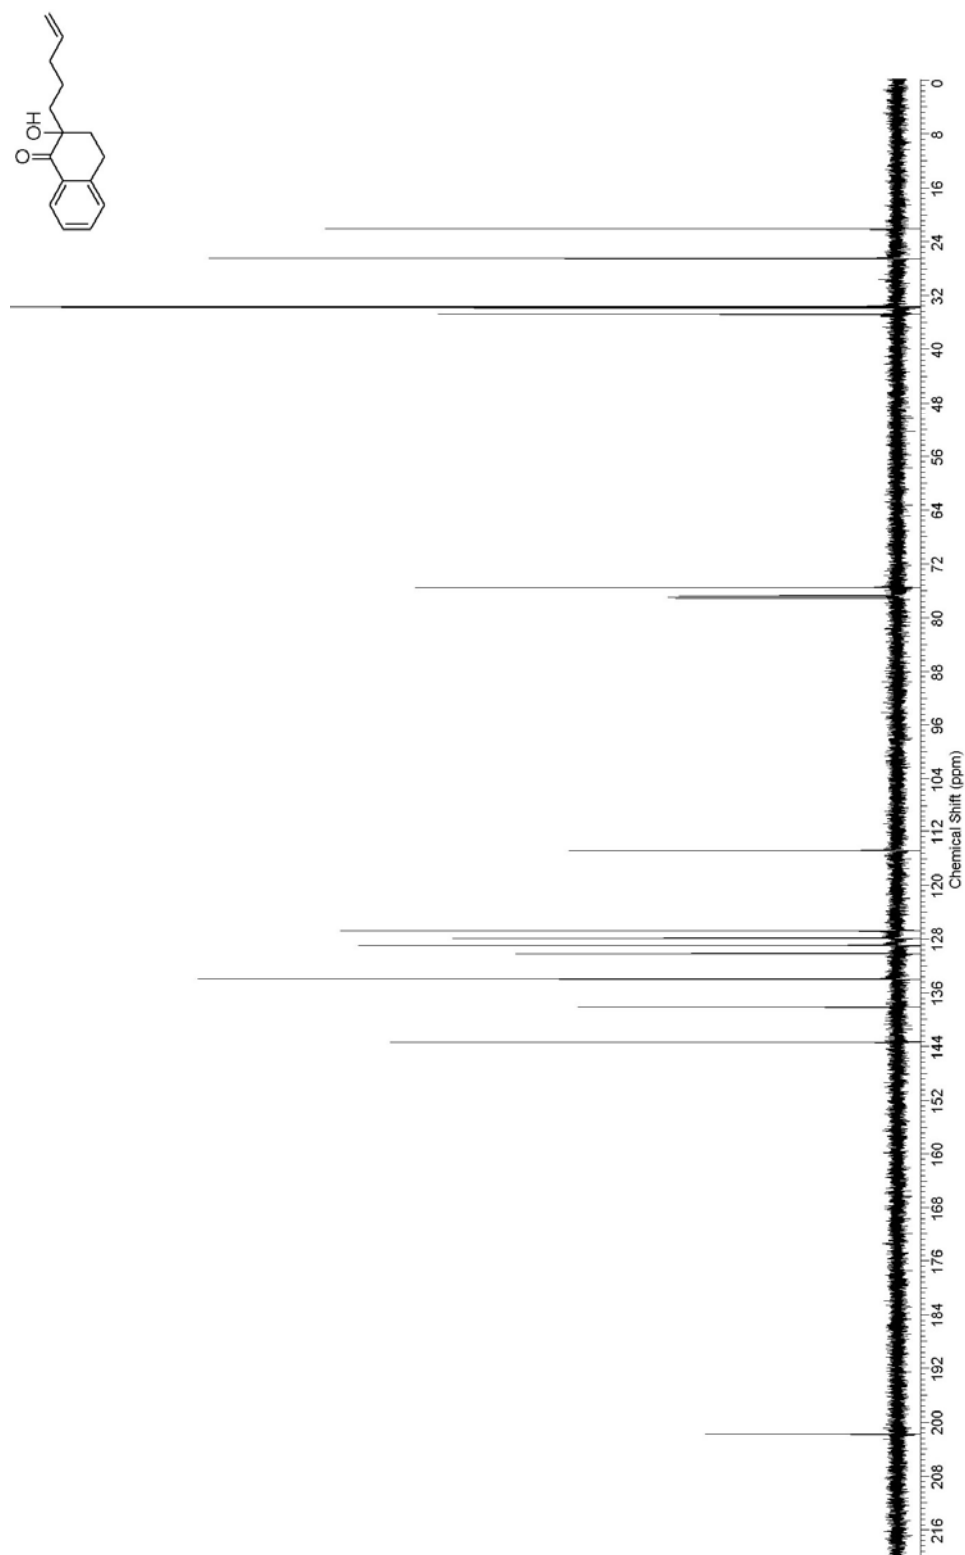

$^{13}\text{C}$  NMR spectrum of **22** in  $\text{CDCl}_3$  at  $23\text{ }^\circ\text{C}$

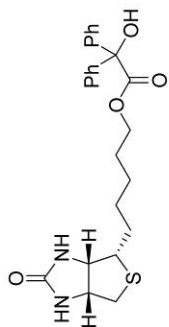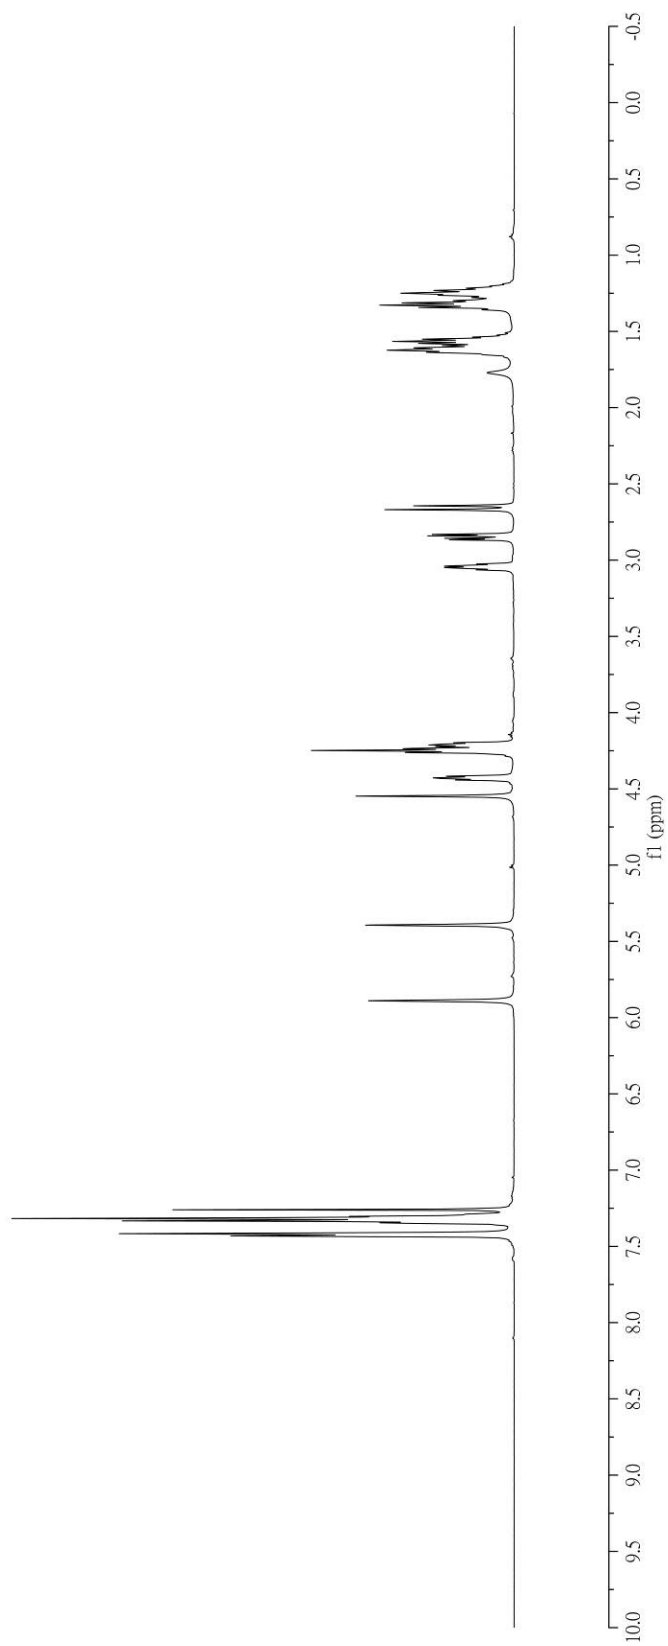

$^1\text{H}$  NMR spectrum of **23** in  $\text{CDCl}_3$  at 23 °C

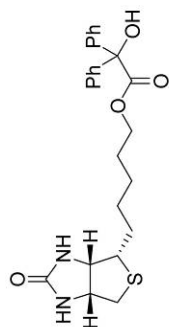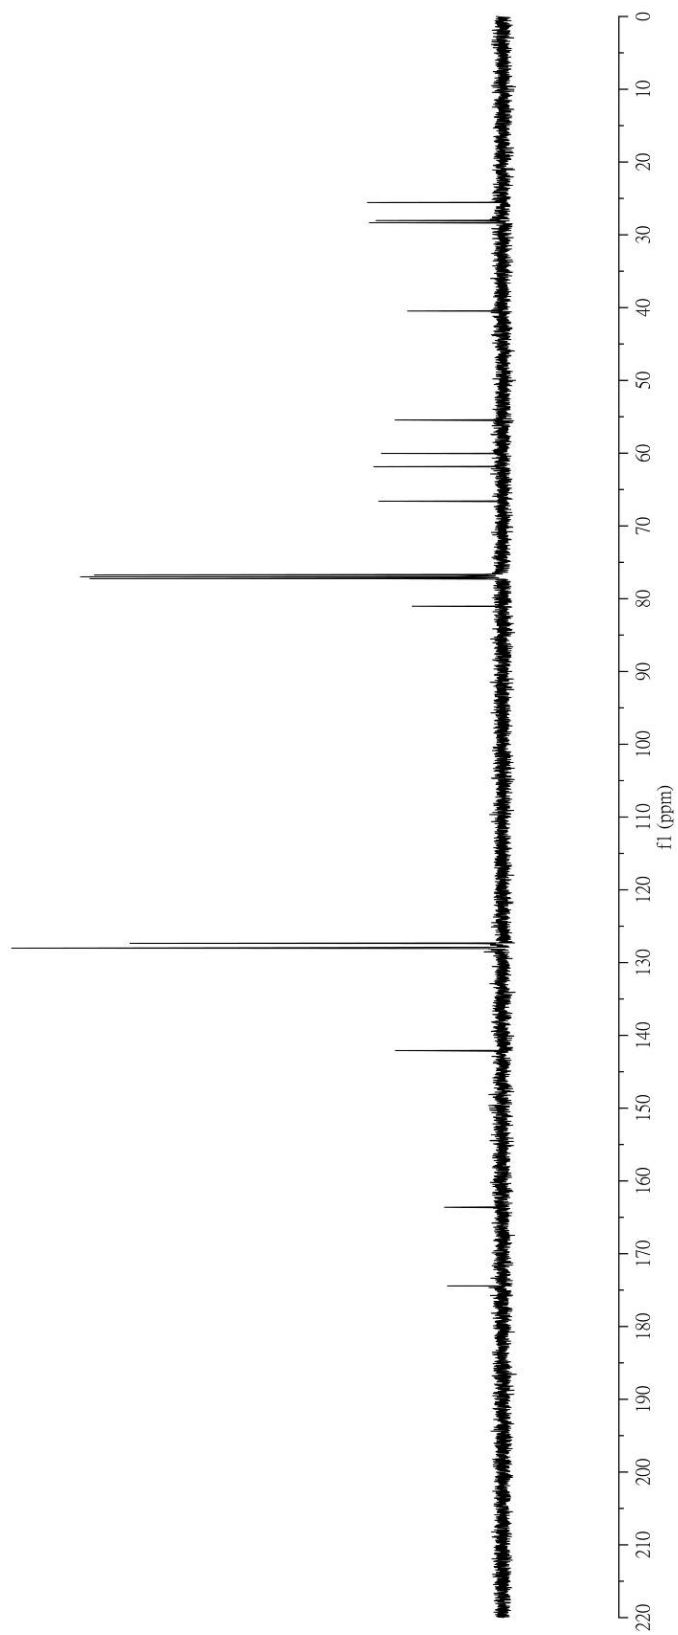

$^{13}\text{C}$  NMR spectrum of **23** in CDCl<sub>3</sub> at 23 °C

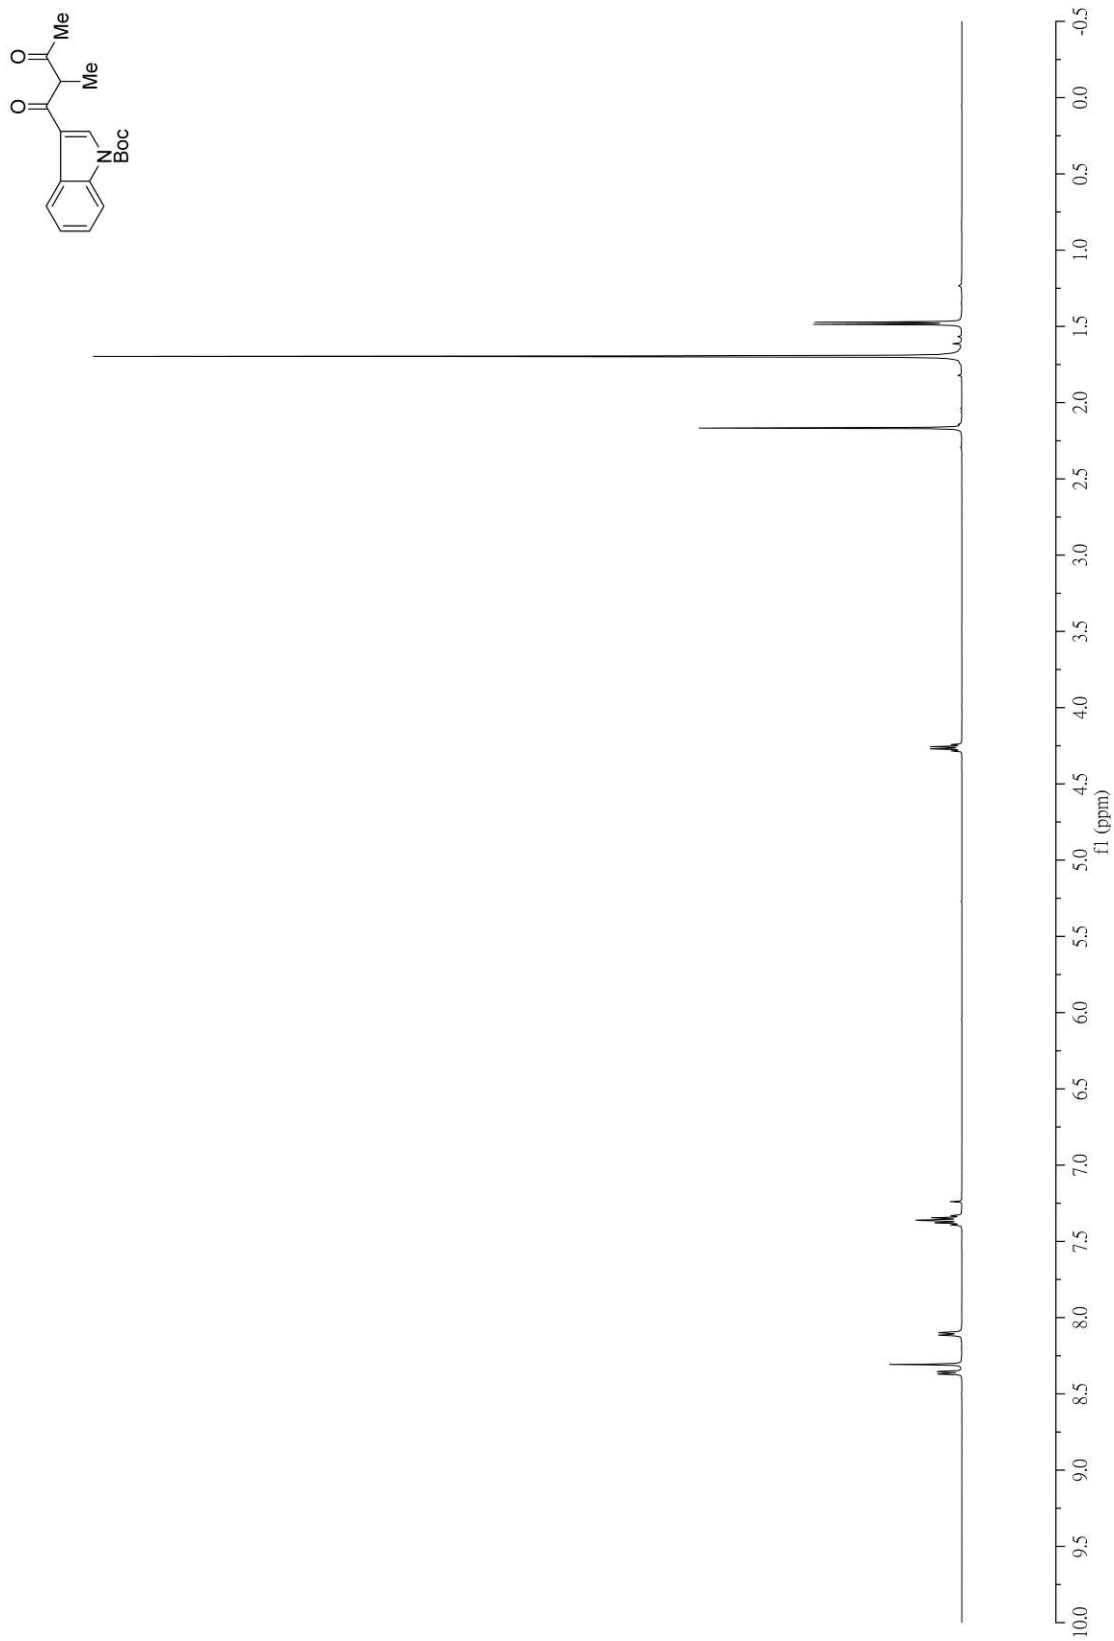

$^1\text{H}$  NMR spectrum of **S1** in  $\text{CDCl}_3$  at  $23\text{ }^\circ\text{C}$



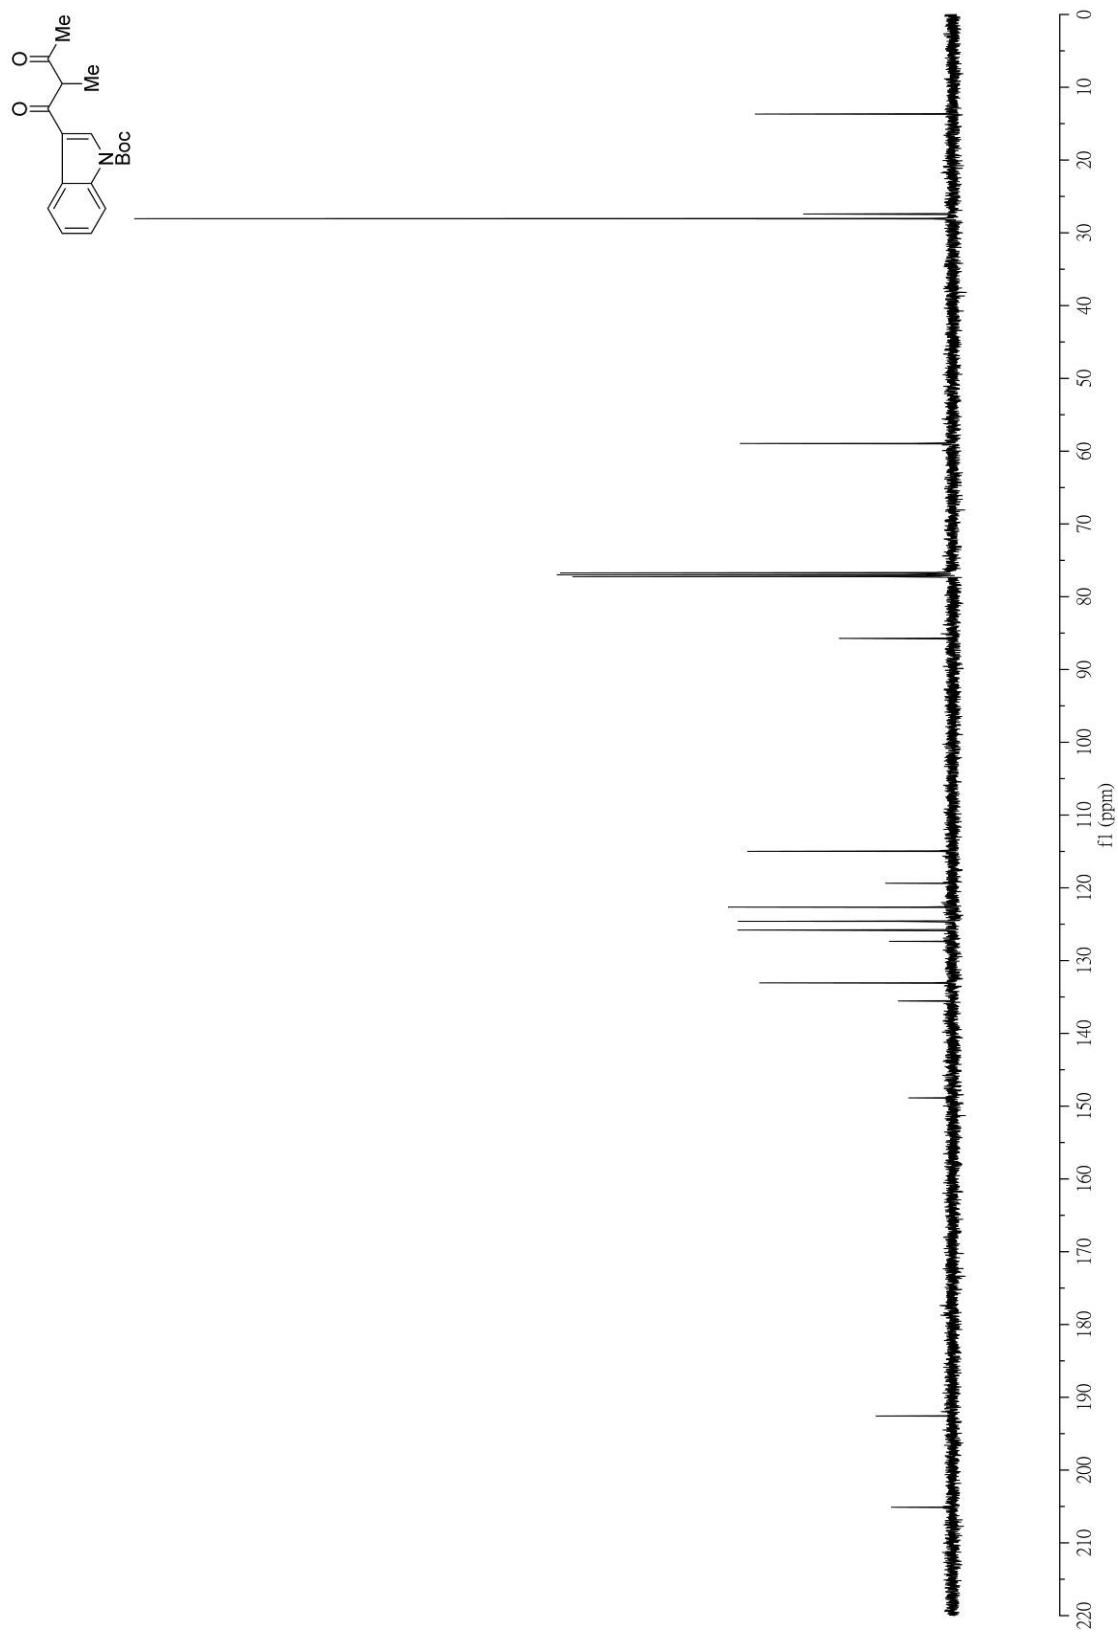

$^{13}\text{C}$  NMR spectrum of **S1** in  $\text{CDCl}_3$  at  $23\text{ }^\circ\text{C}$

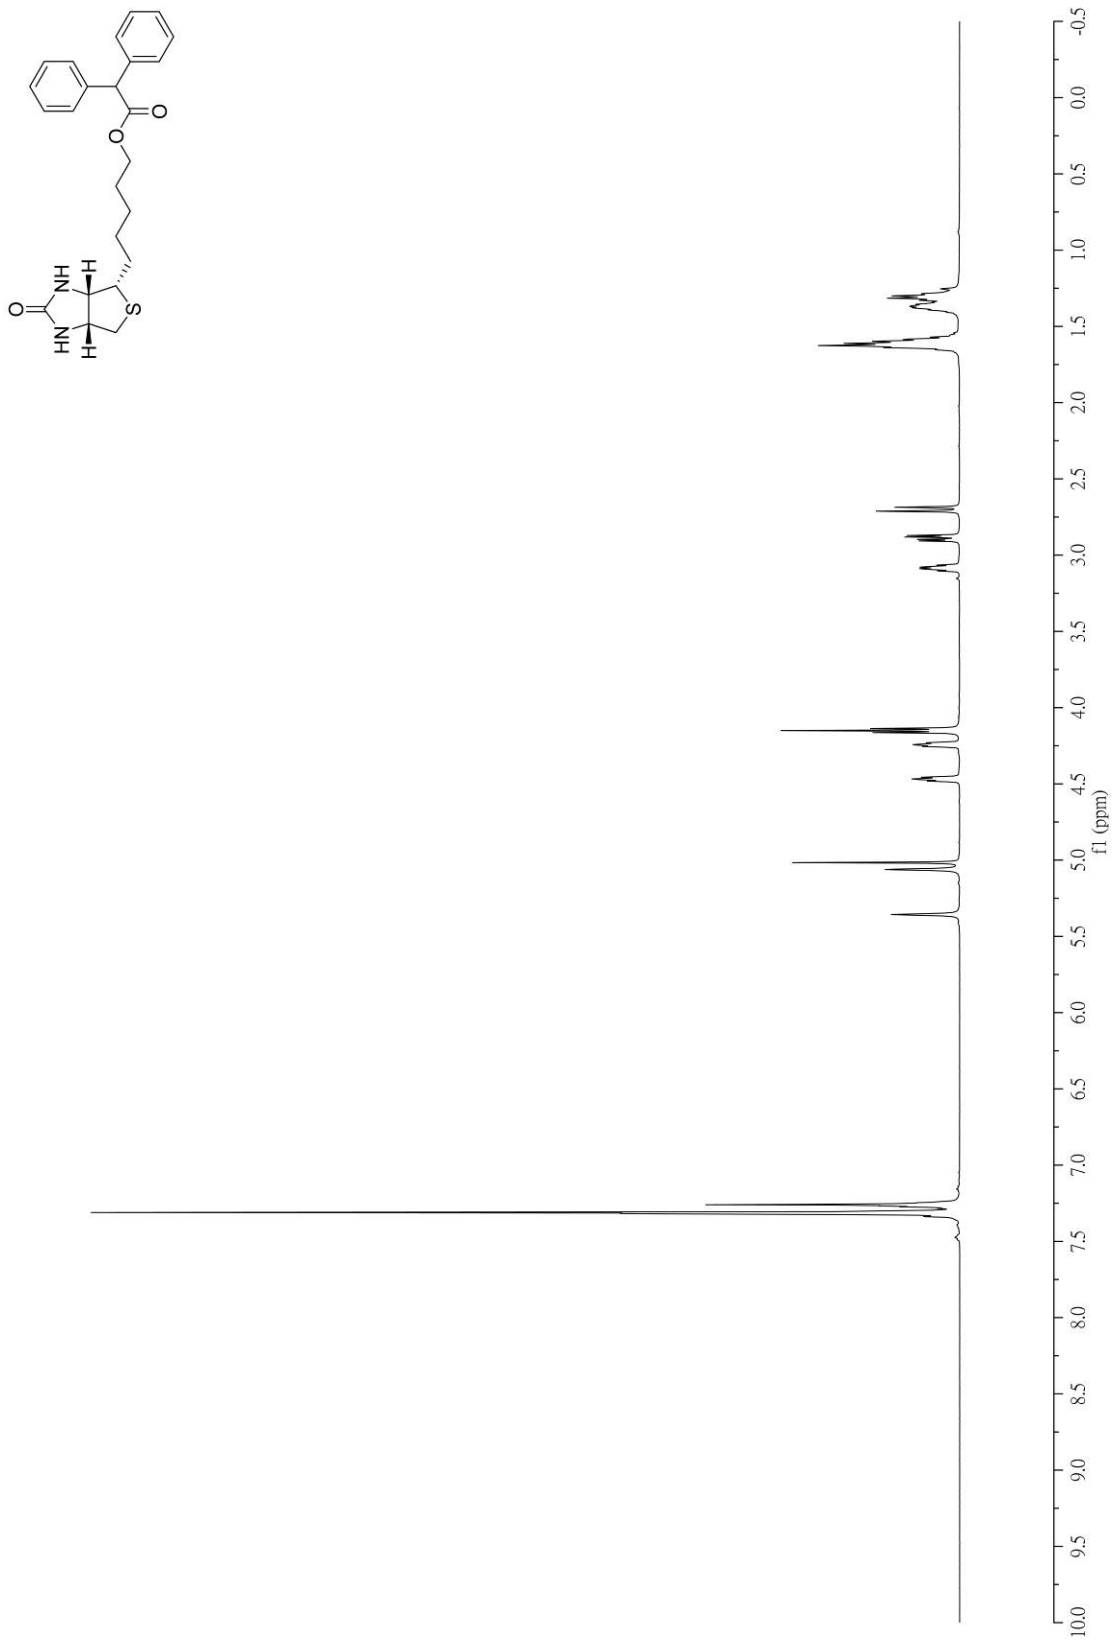

$^1\text{H}$  NMR spectrum of **S2** in  $\text{CDCl}_3$  at  $23^\circ\text{C}$

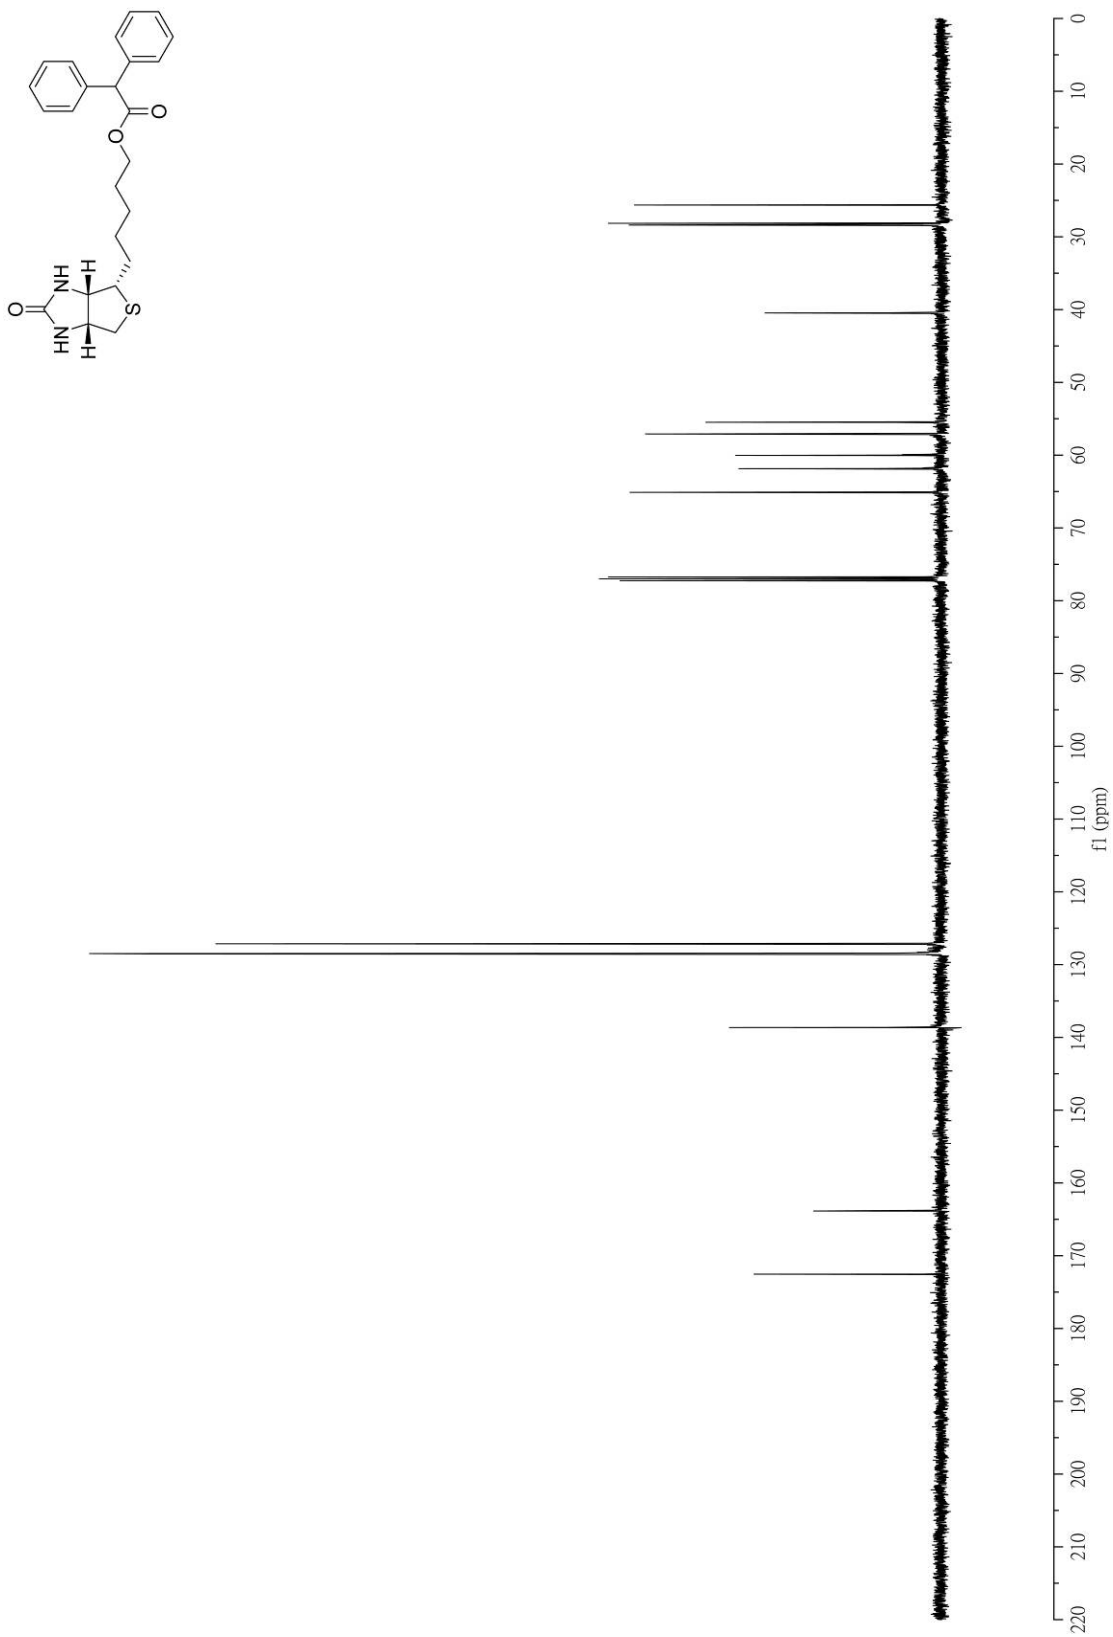

$^{13}\text{C}$  NMR spectrum of **S2** in  $\text{CDCl}_3$  at 23 °C

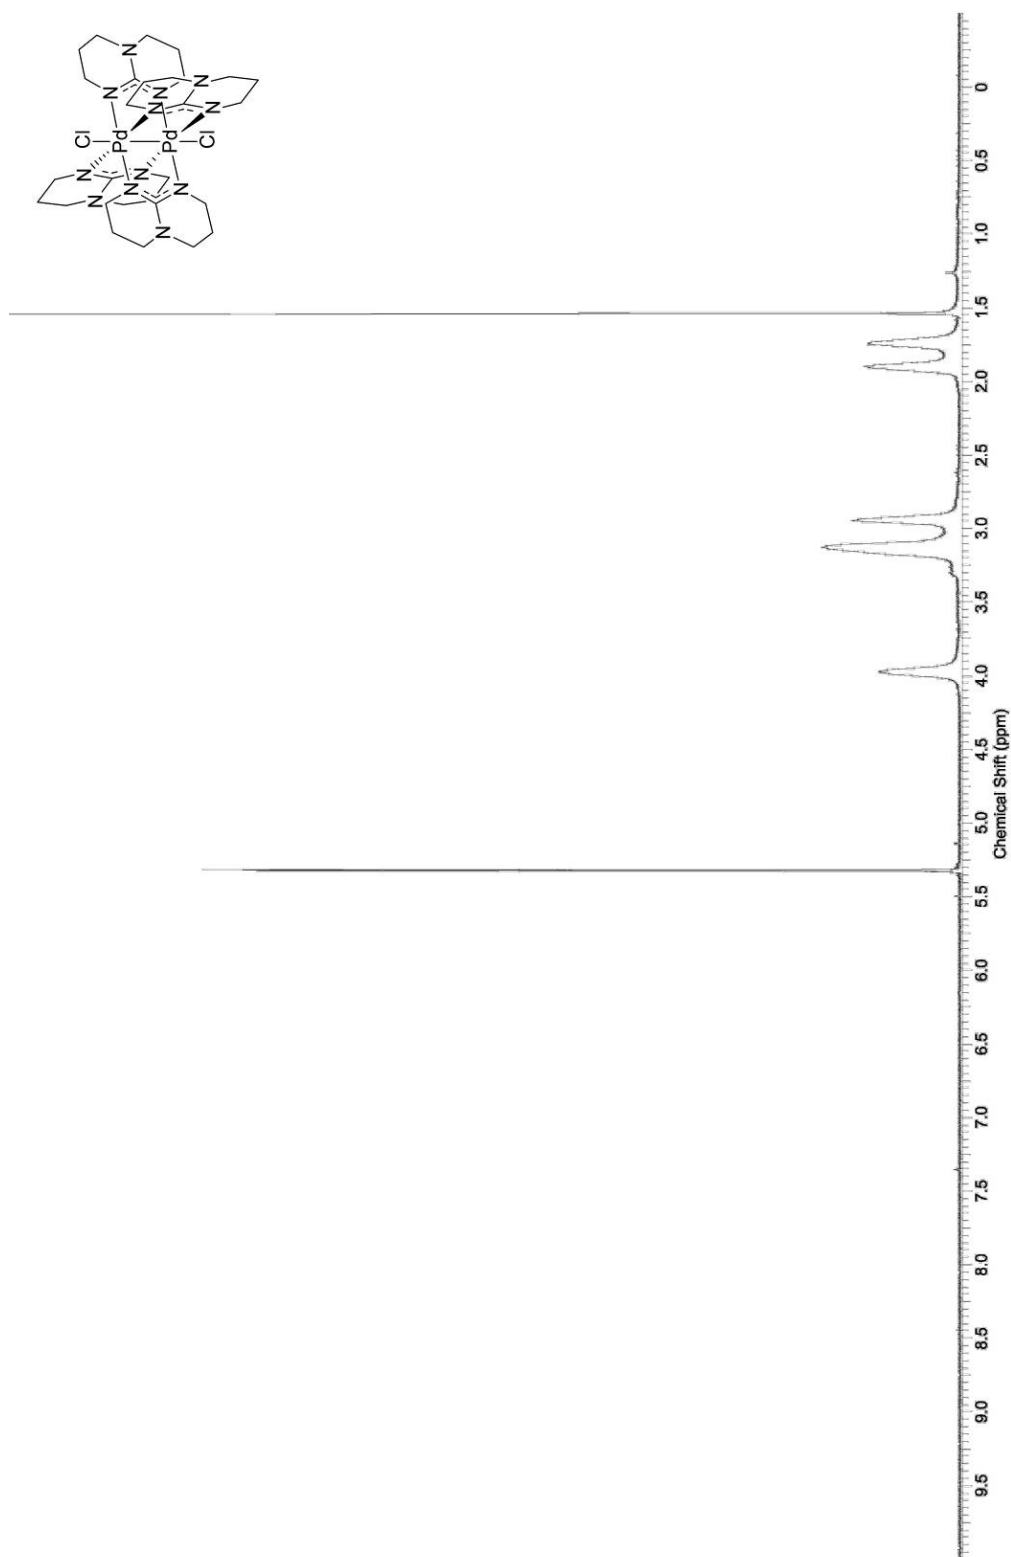

$^1\text{H}$  NMR spectrum of S3 in  $\text{CD}_2\text{Cl}_2$  at  $23\text{ }^\circ\text{C}$

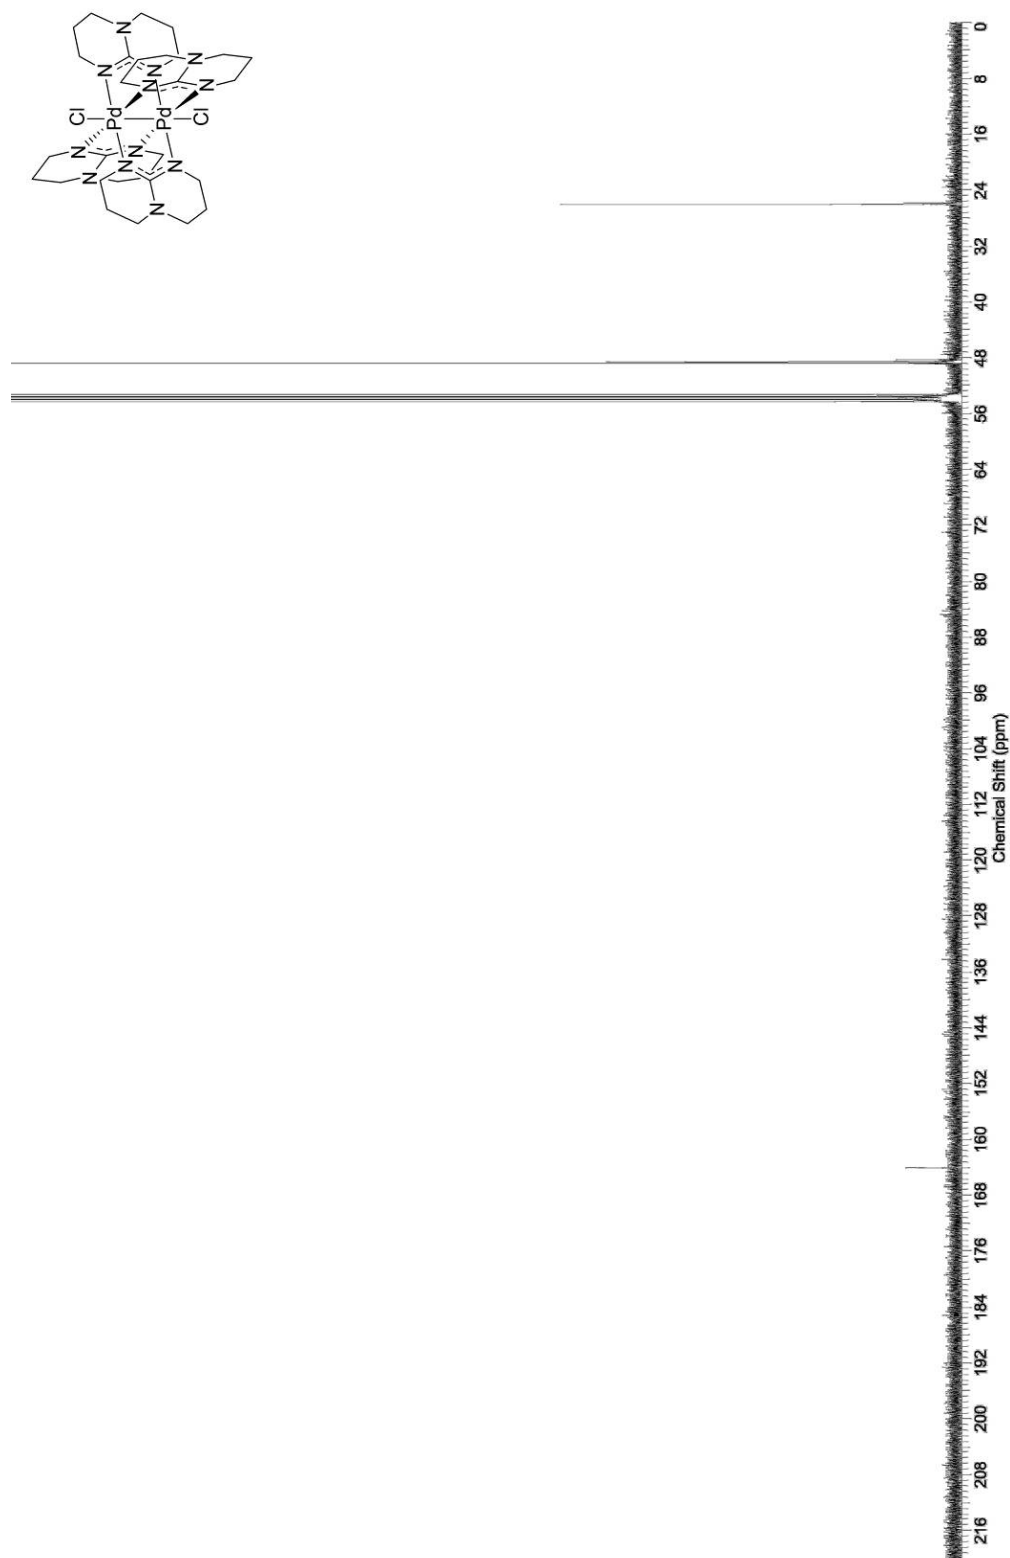

$^{13}\text{C}$  NMR spectrum of **S3** in  $\text{CD}_2\text{Cl}_2$  at  $23\text{ }^\circ\text{C}$

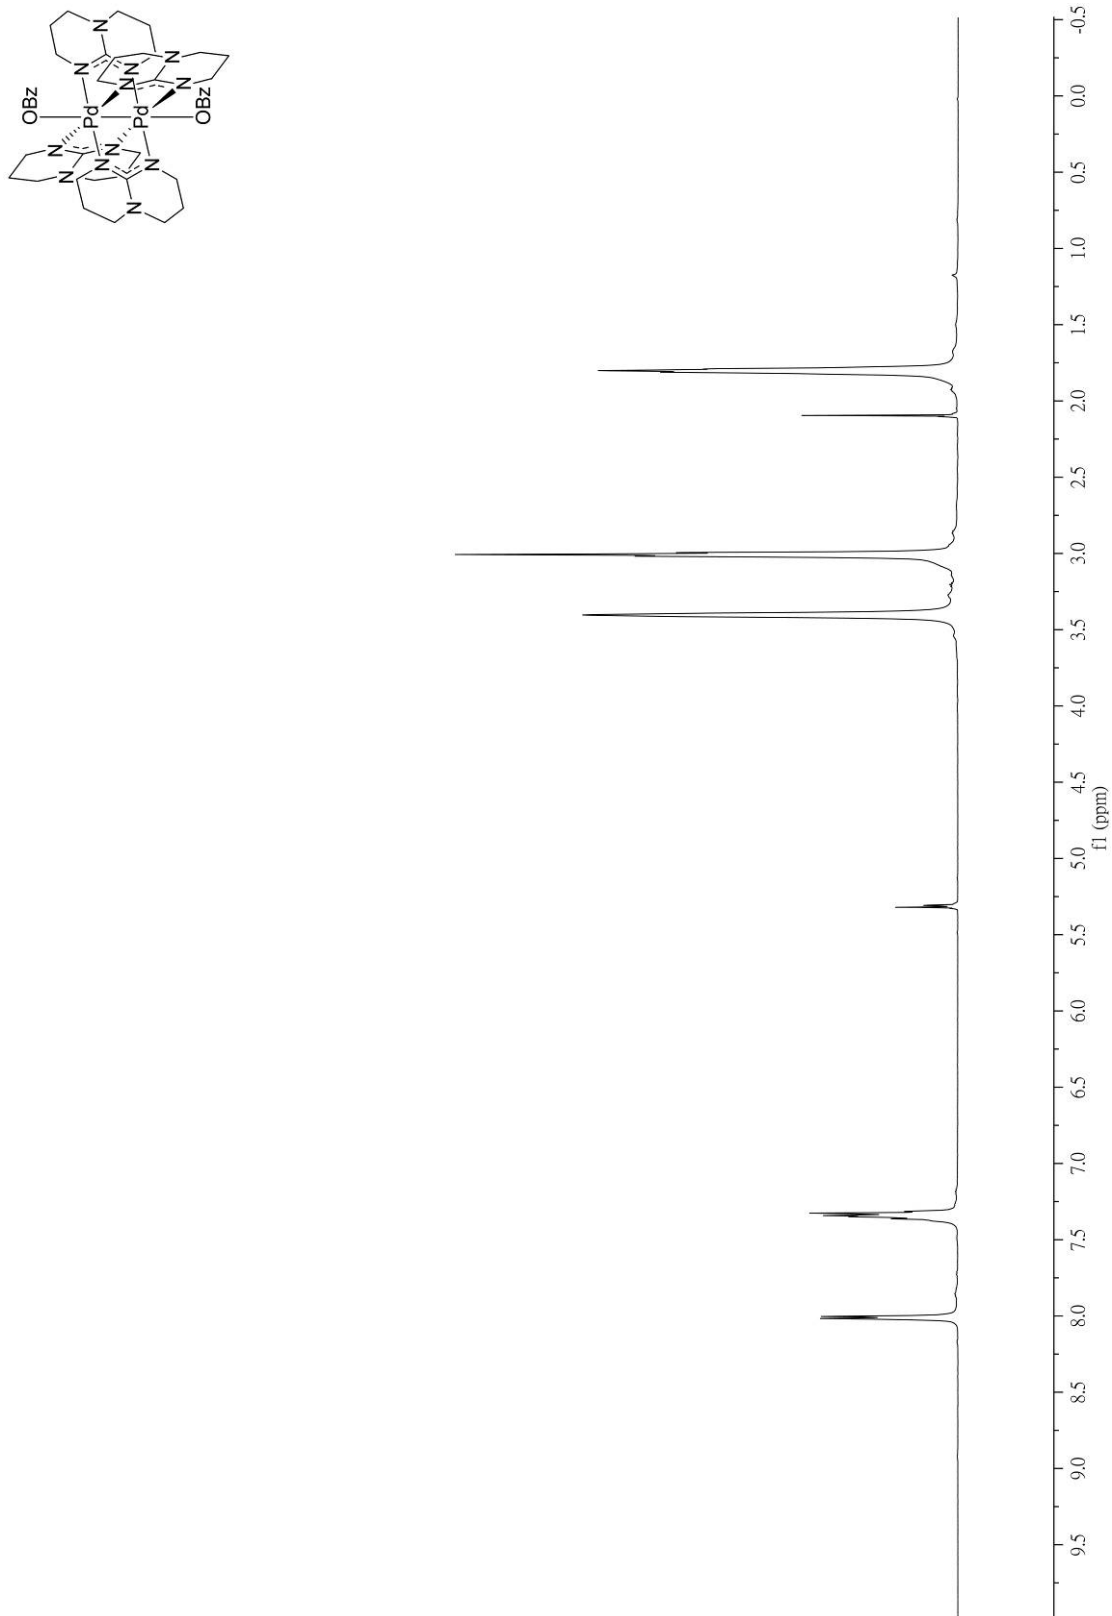

$^1\text{H}$  NMR spectrum of **24** in  $\text{CD}_2\text{Cl}_2$  at  $-50\text{ }^\circ\text{C}$

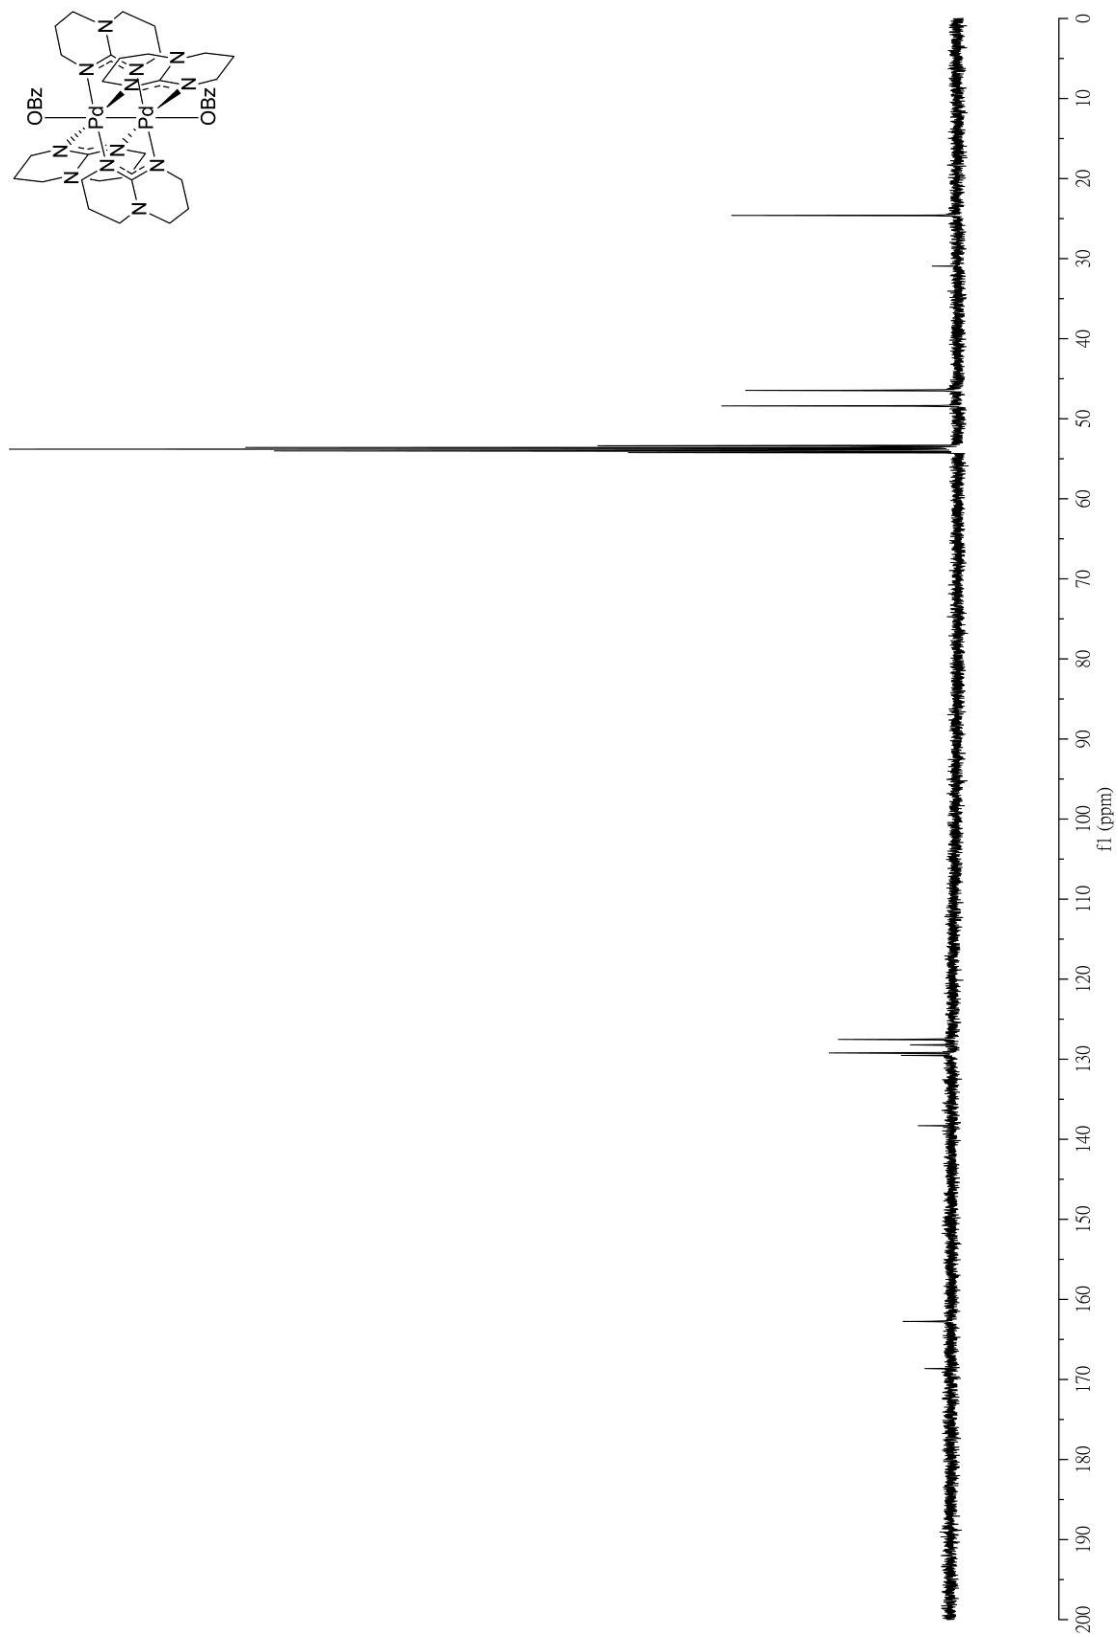

$^{13}\text{C}$  NMR spectrum of **24** in  $\text{CD}_2\text{Cl}_2$  at  $-50\text{ }^\circ\text{C}$

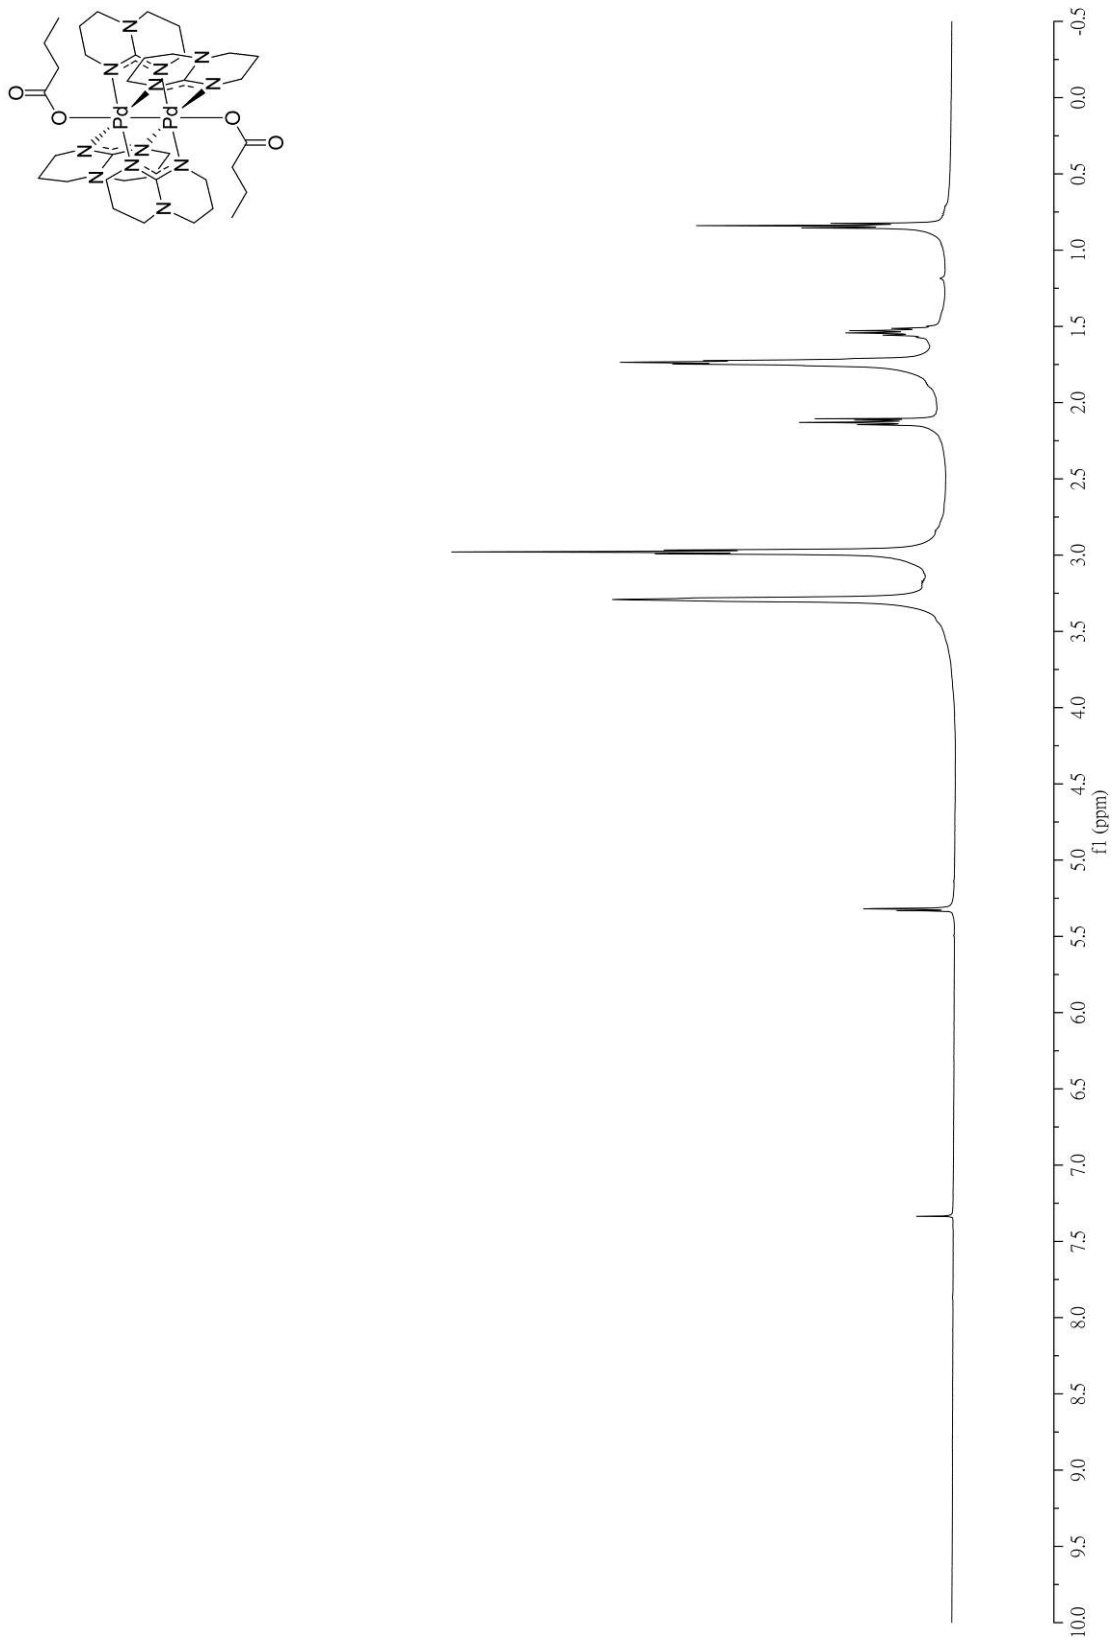

$^1\text{H}$  NMR spectrum of S4 in  $\text{CD}_2\text{Cl}_2$  at  $-50\text{ }^\circ\text{C}$



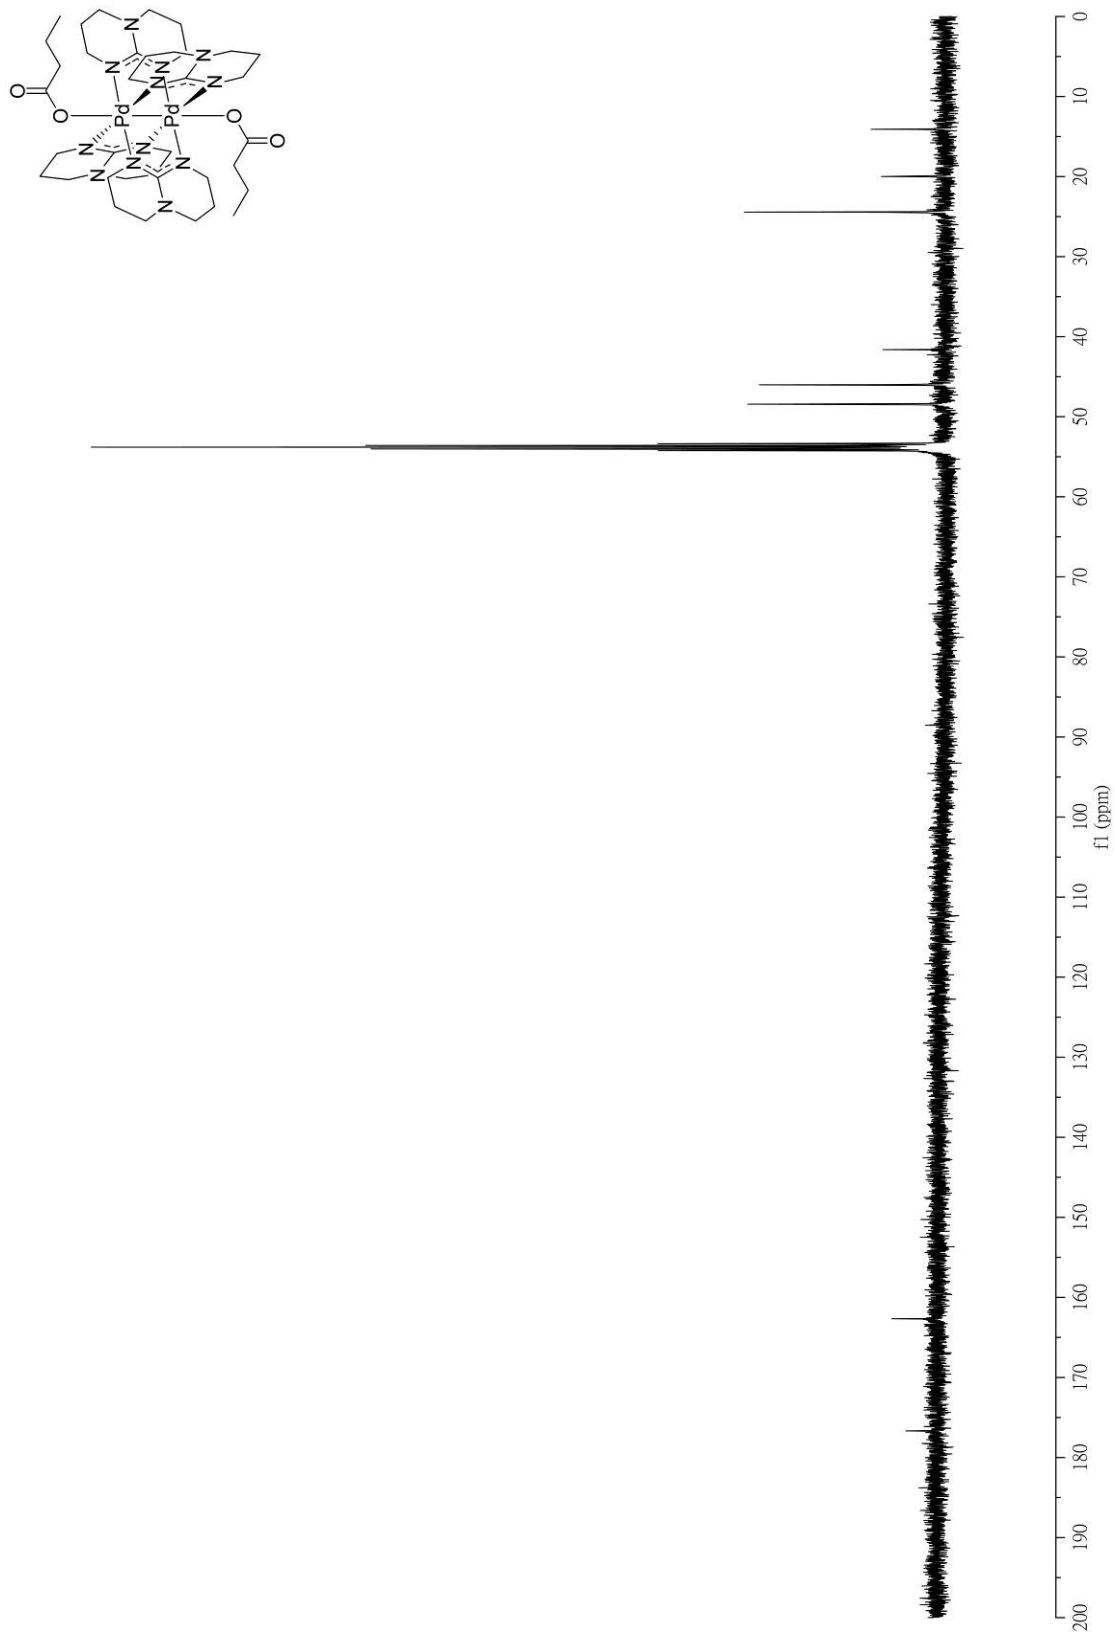

$^{13}\text{C}$  NMR spectrum of **S4** in  $\text{CD}_2\text{Cl}_2$  at  $-50\text{ }^\circ\text{C}$

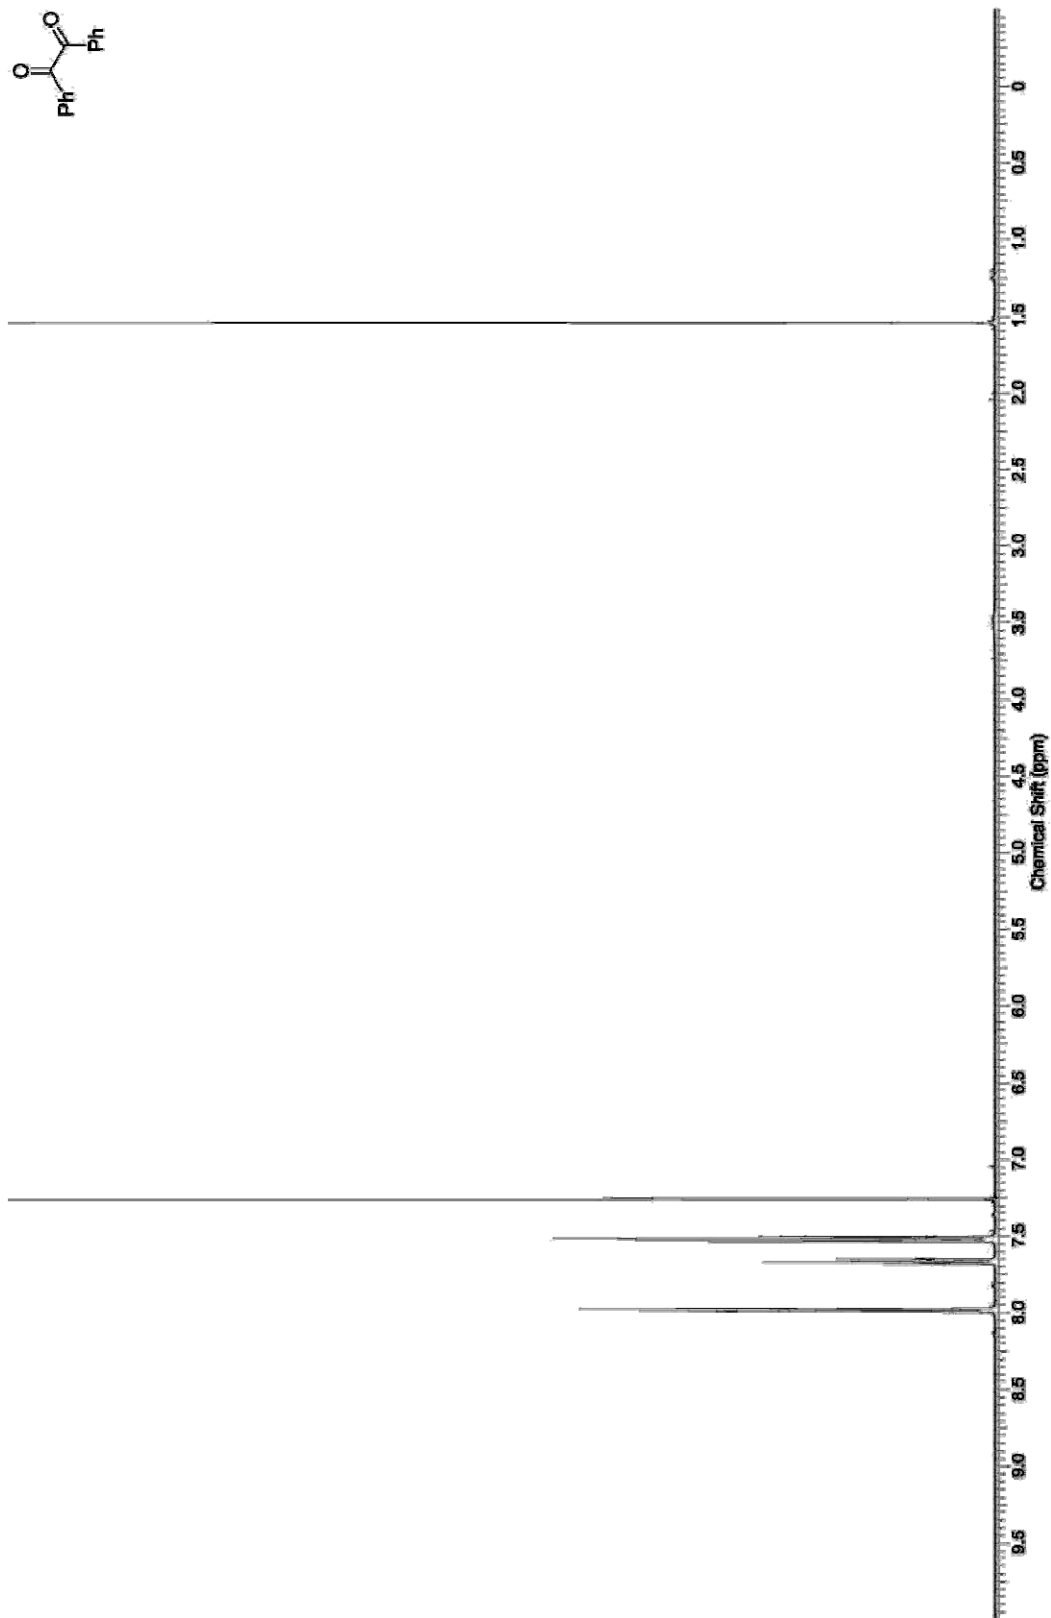

$^1\text{H}$  NMR spectrum of **S5** in  $\text{CDCl}_3$  at  $23\text{ }^\circ\text{C}$

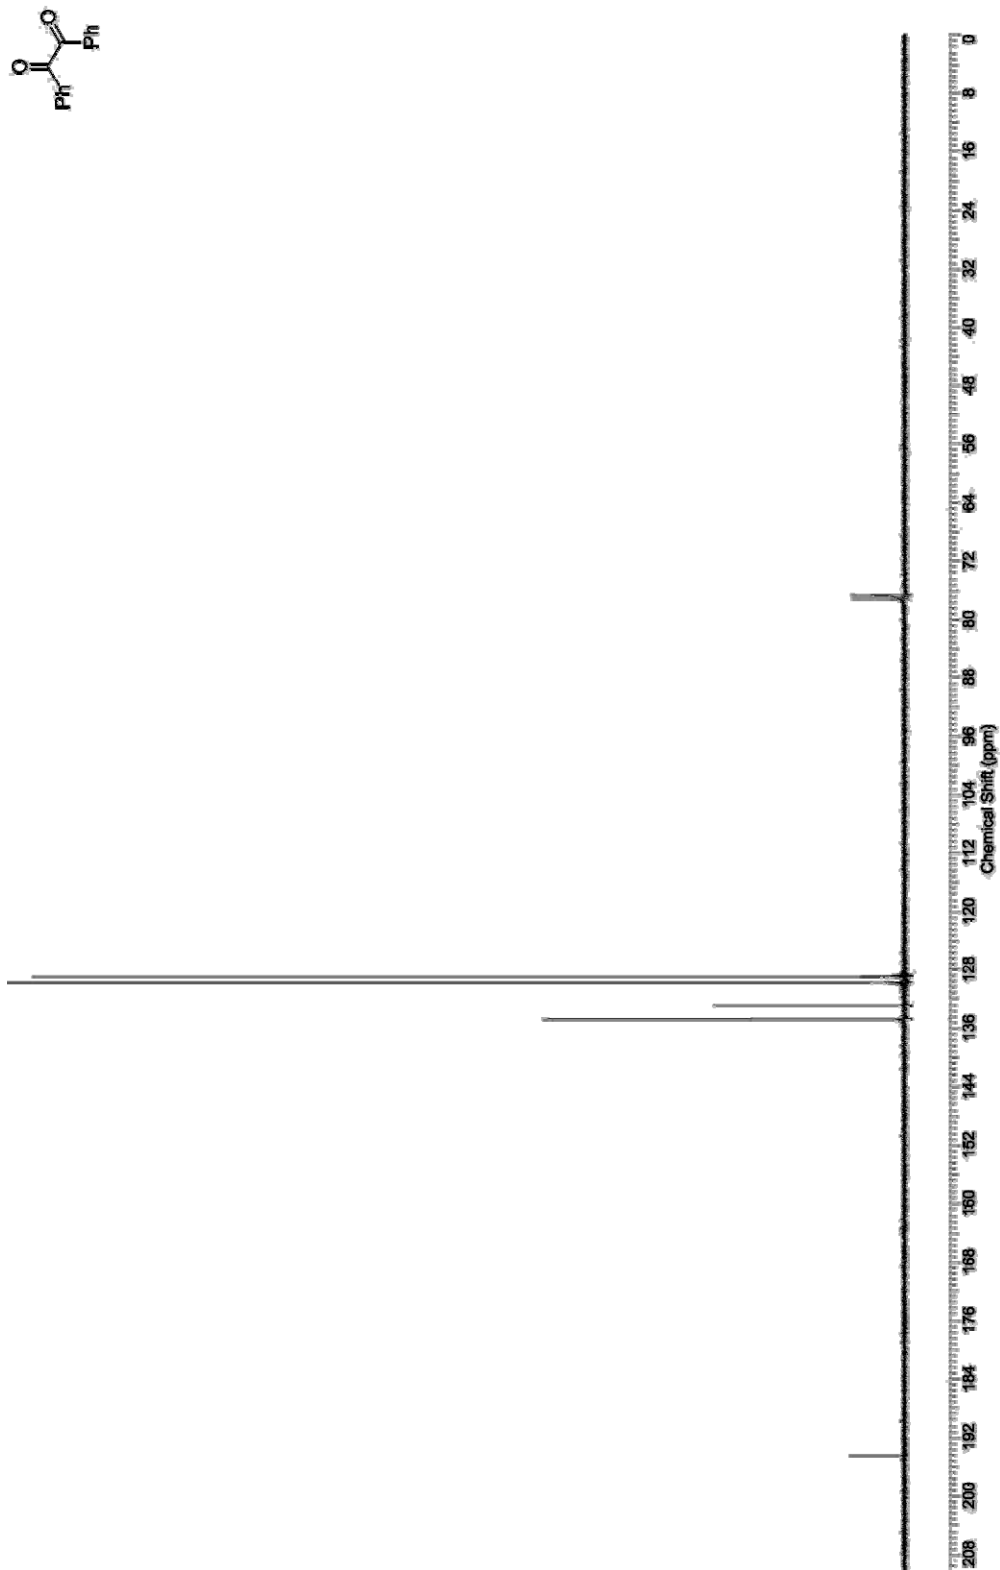

$^{13}\text{C}$  NMR spectrum of S5 in  $\text{CDCl}_3$  at 23 °C

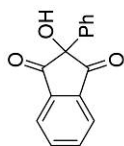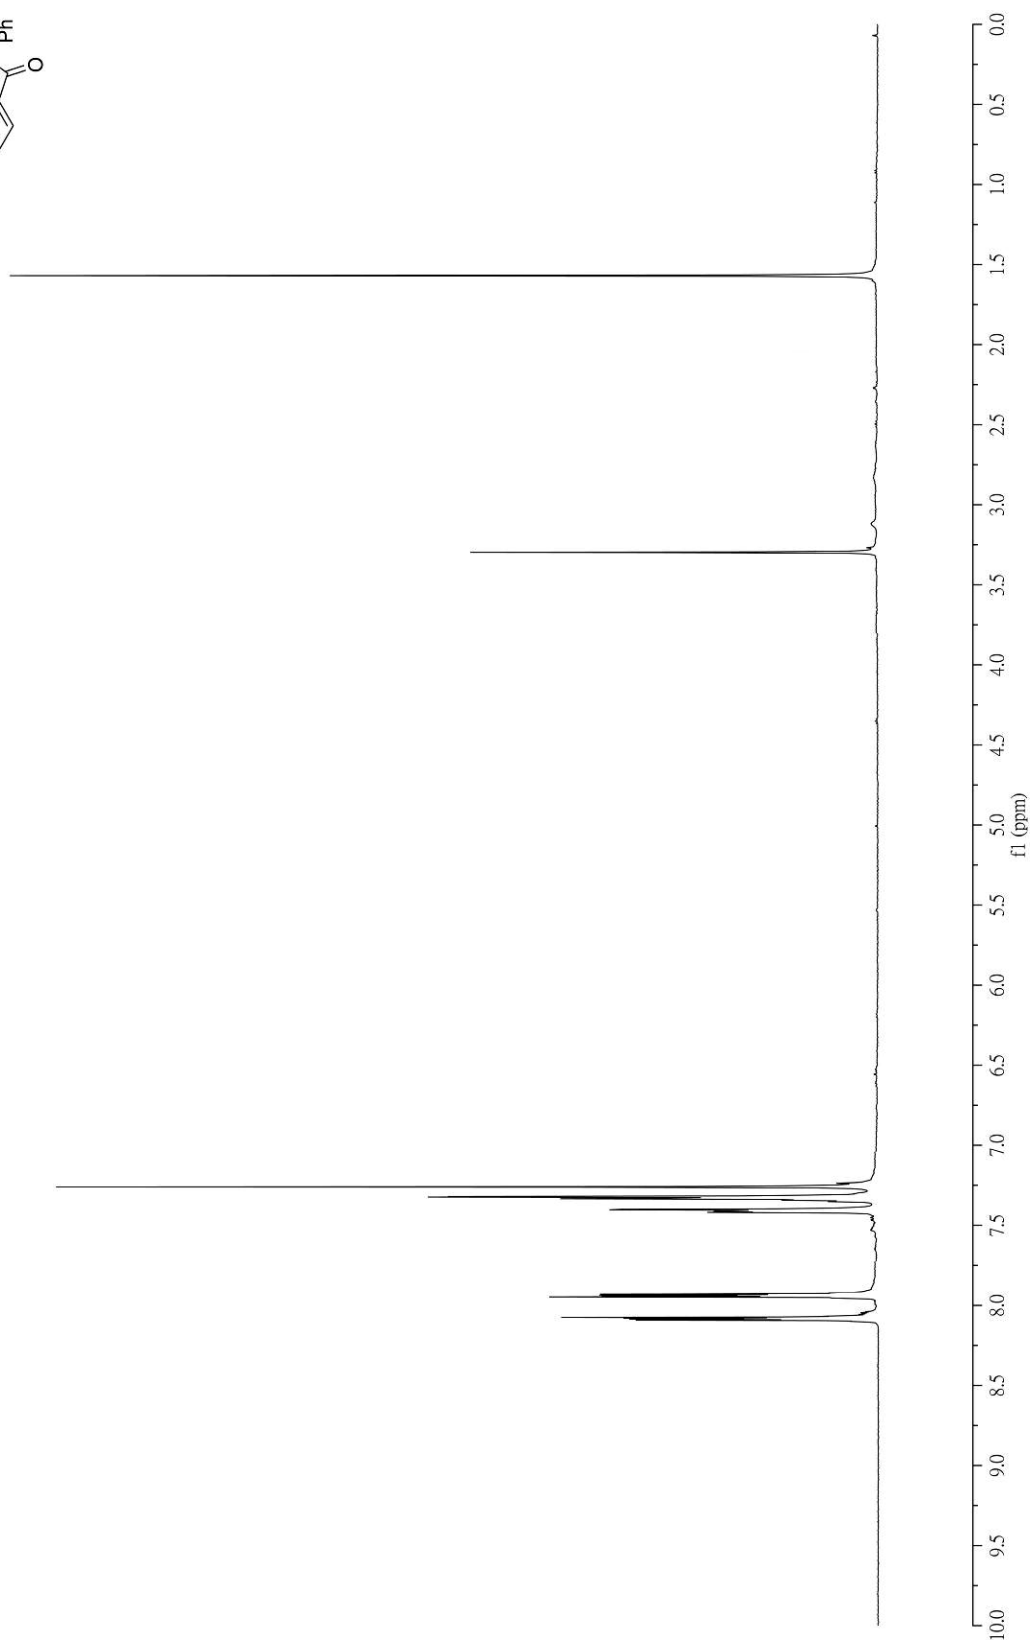

$^1\text{H}$  NMR spectrum of **S6** in  $\text{CDCl}_3$  at  $23\text{ }^\circ\text{C}$

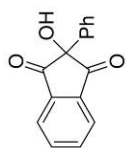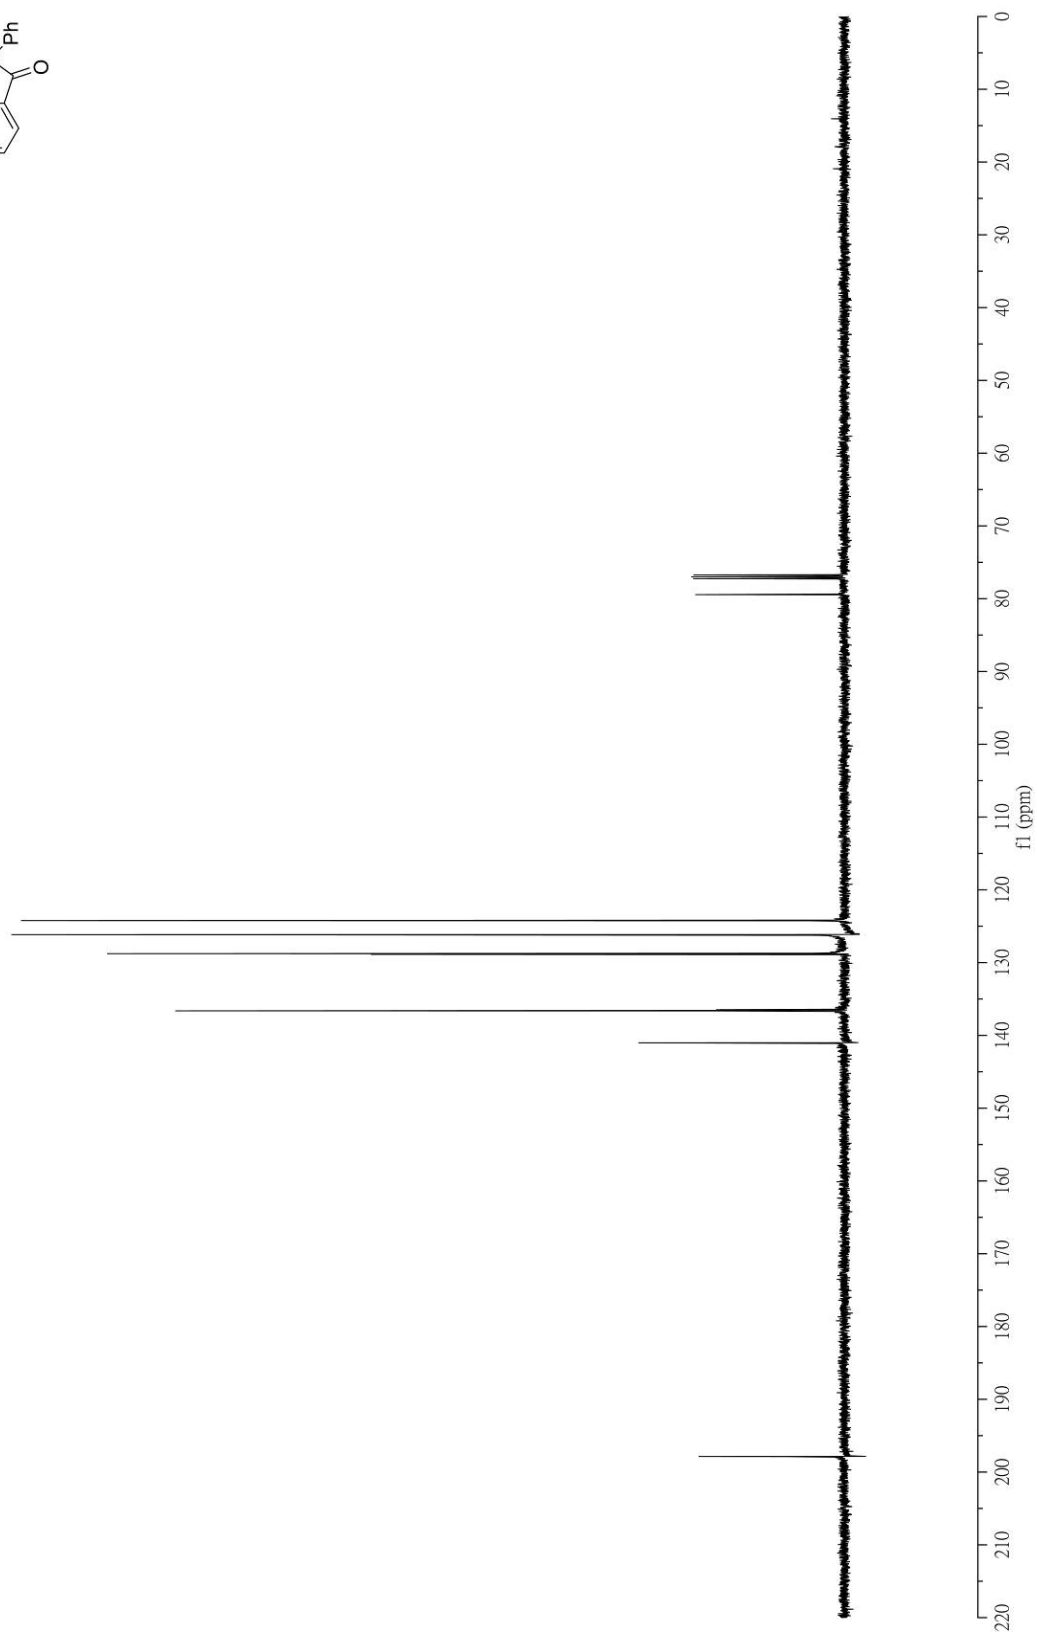

$^{13}\text{C}$  NMR spectrum of S6 in  $\text{CDCl}_3$  at 23 °C

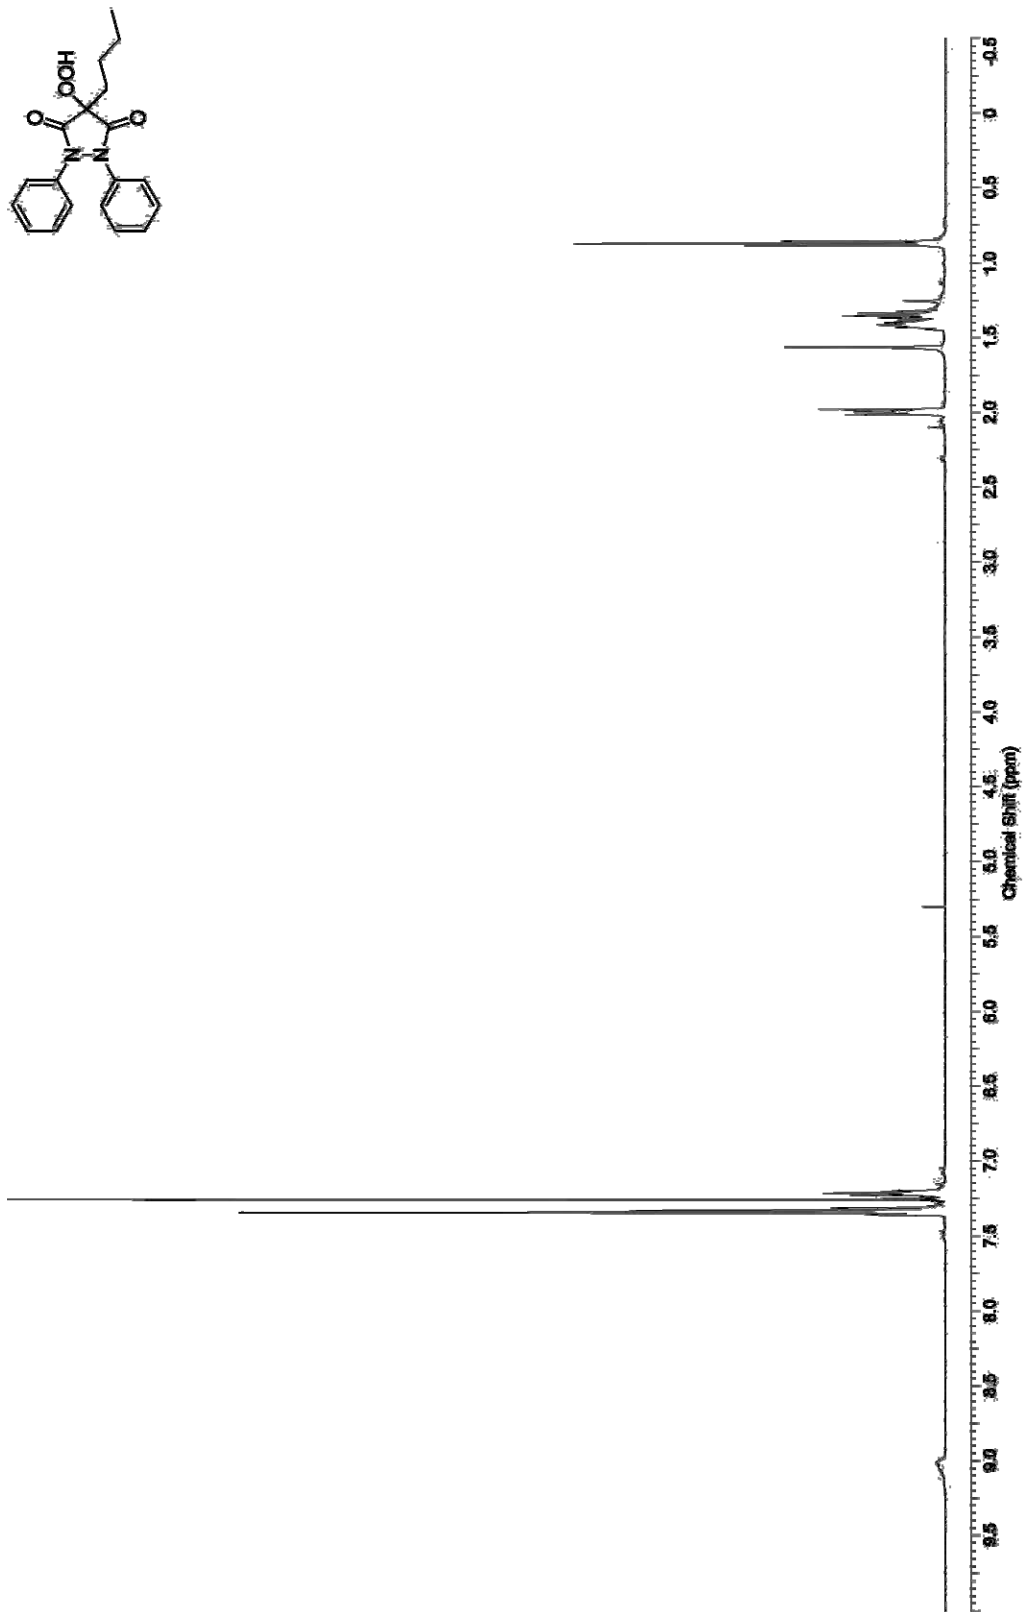

$^1\text{H}$  NMR spectrum of **S7** in  $\text{CDCl}_3$  at  $23\text{ }^\circ\text{C}$

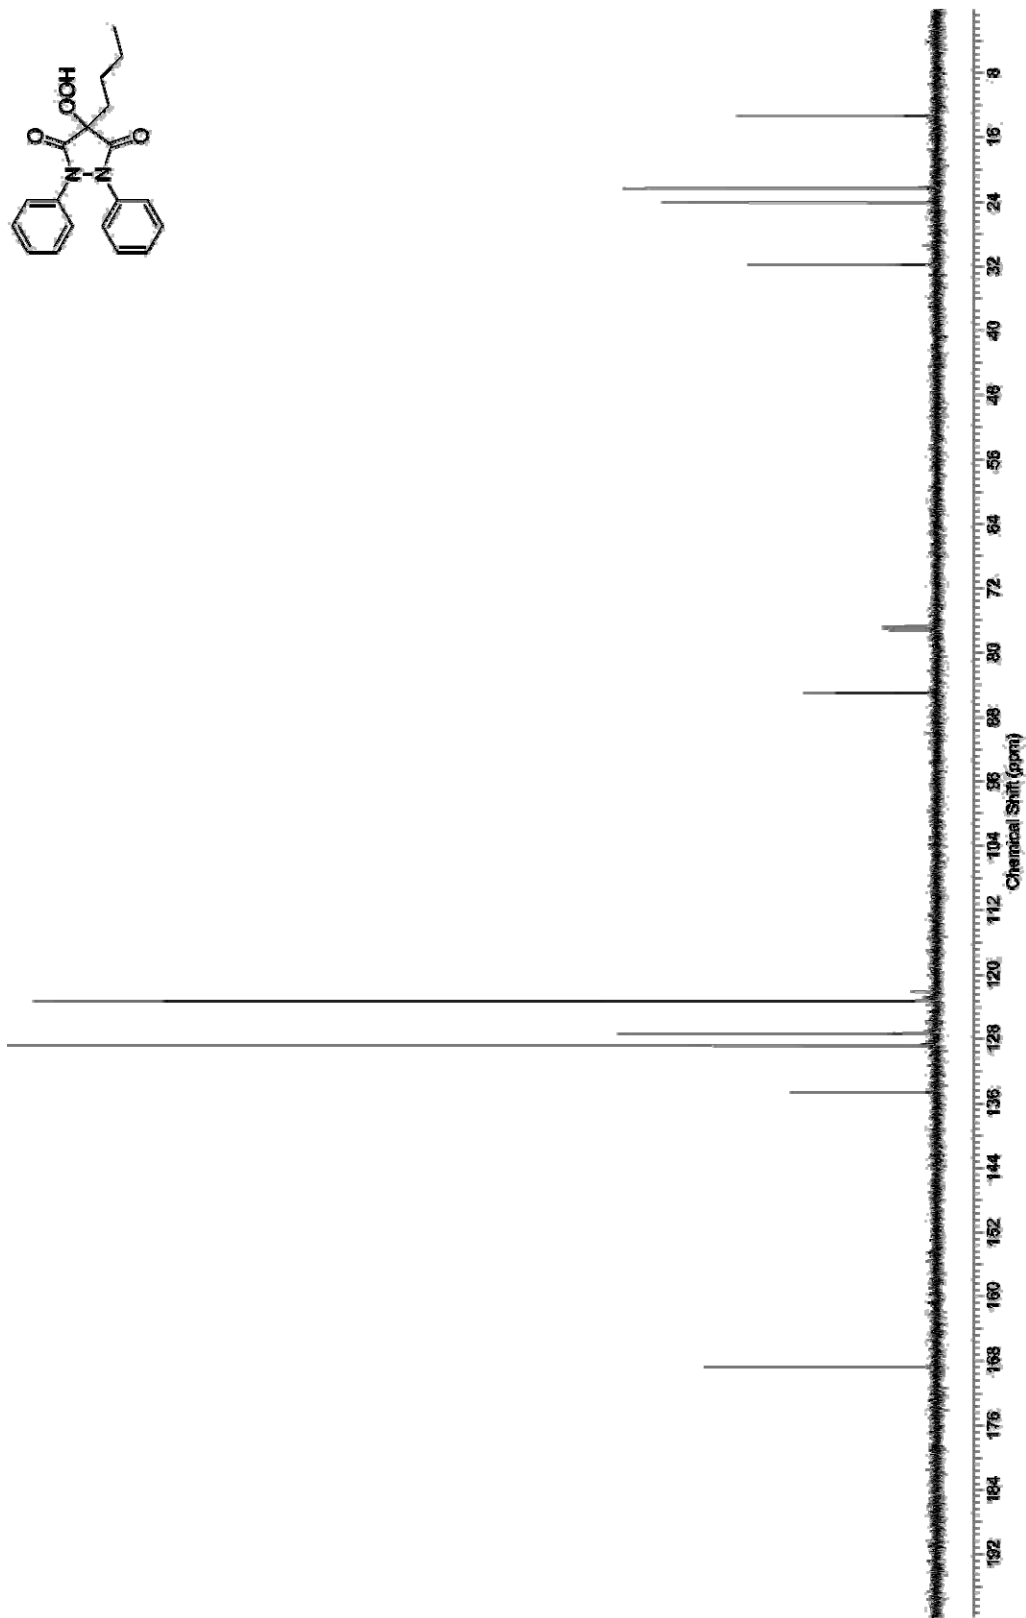

$^{13}\text{C}$  NMR spectrum of S7 in  $\text{CDCl}_3$  at  $23^\circ\text{C}$

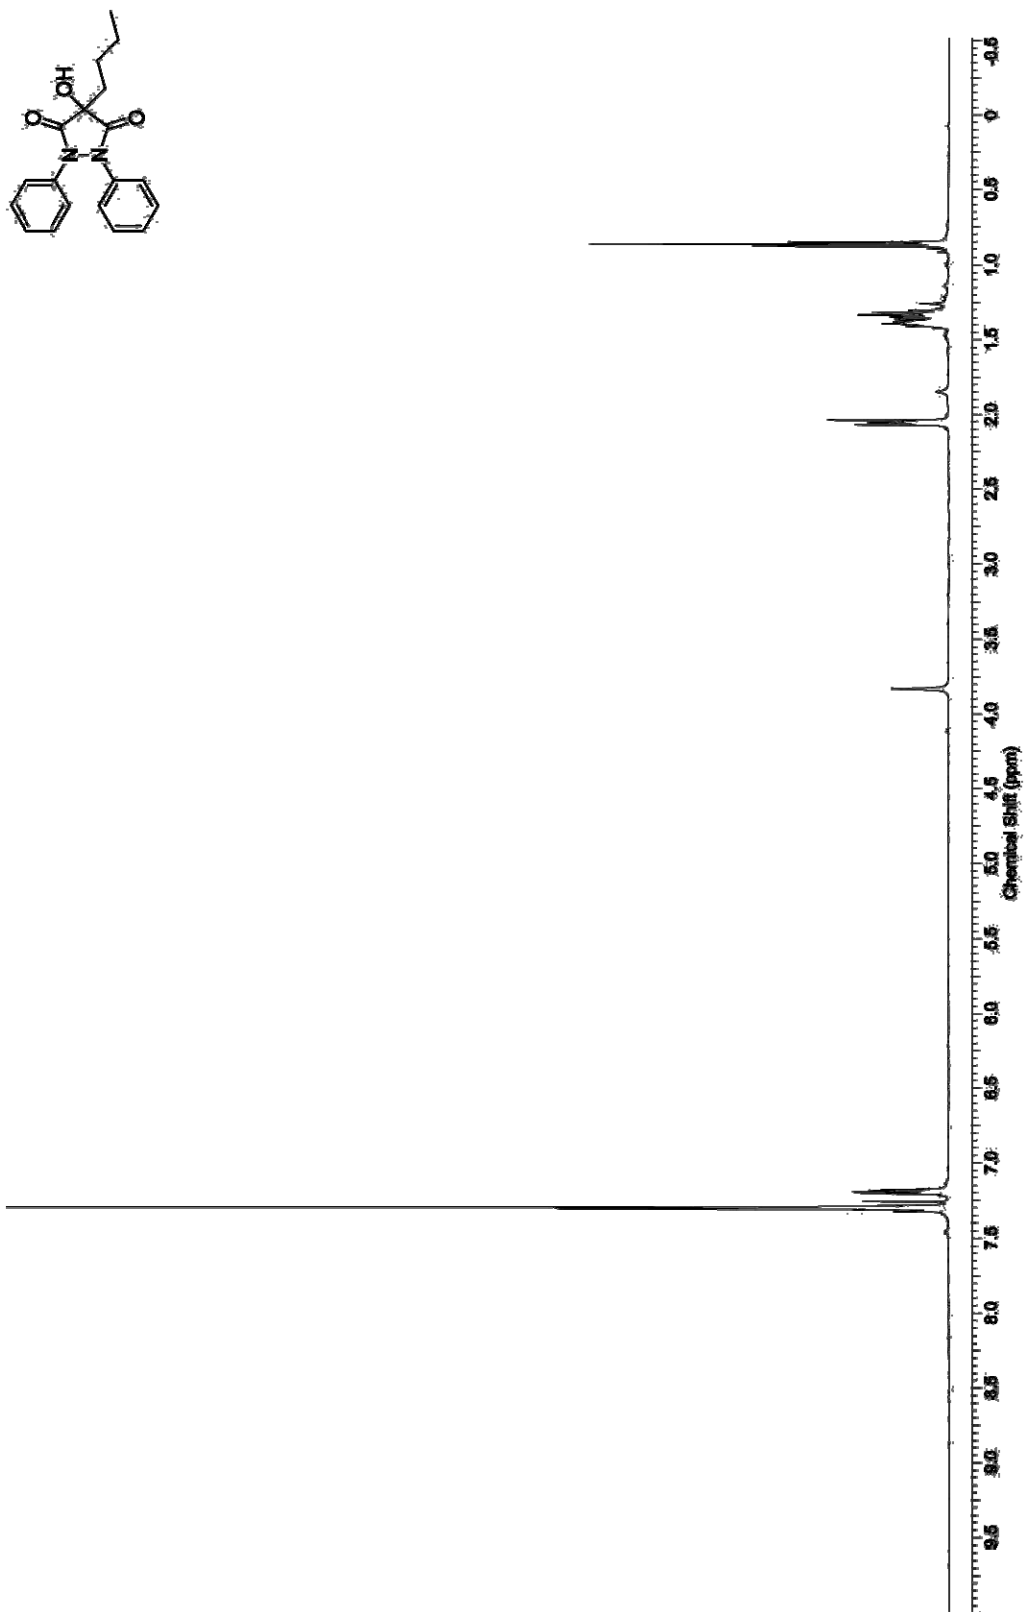

$^1\text{H}$  NMR spectrum of **S8** in  $\text{CDCl}_3$  at 23 °C



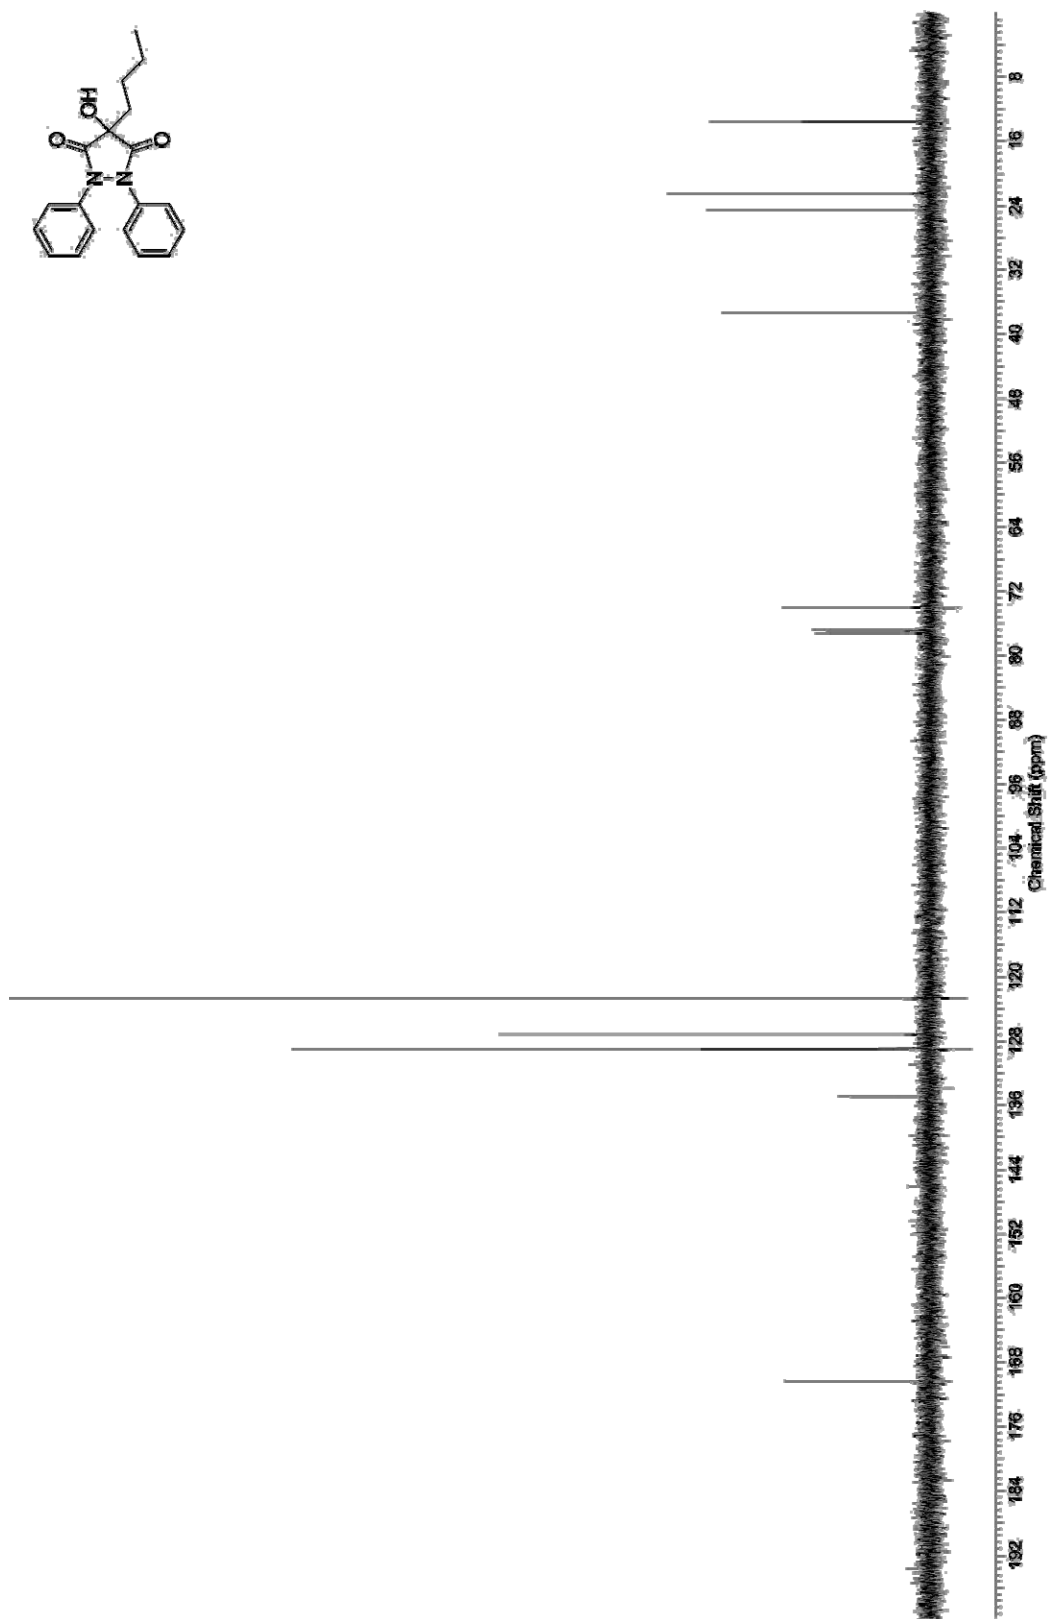

$^{13}\text{C}$  NMR spectrum of **S8** in  $\text{CDCl}_3$  at  $23\text{ }^\circ\text{C}$

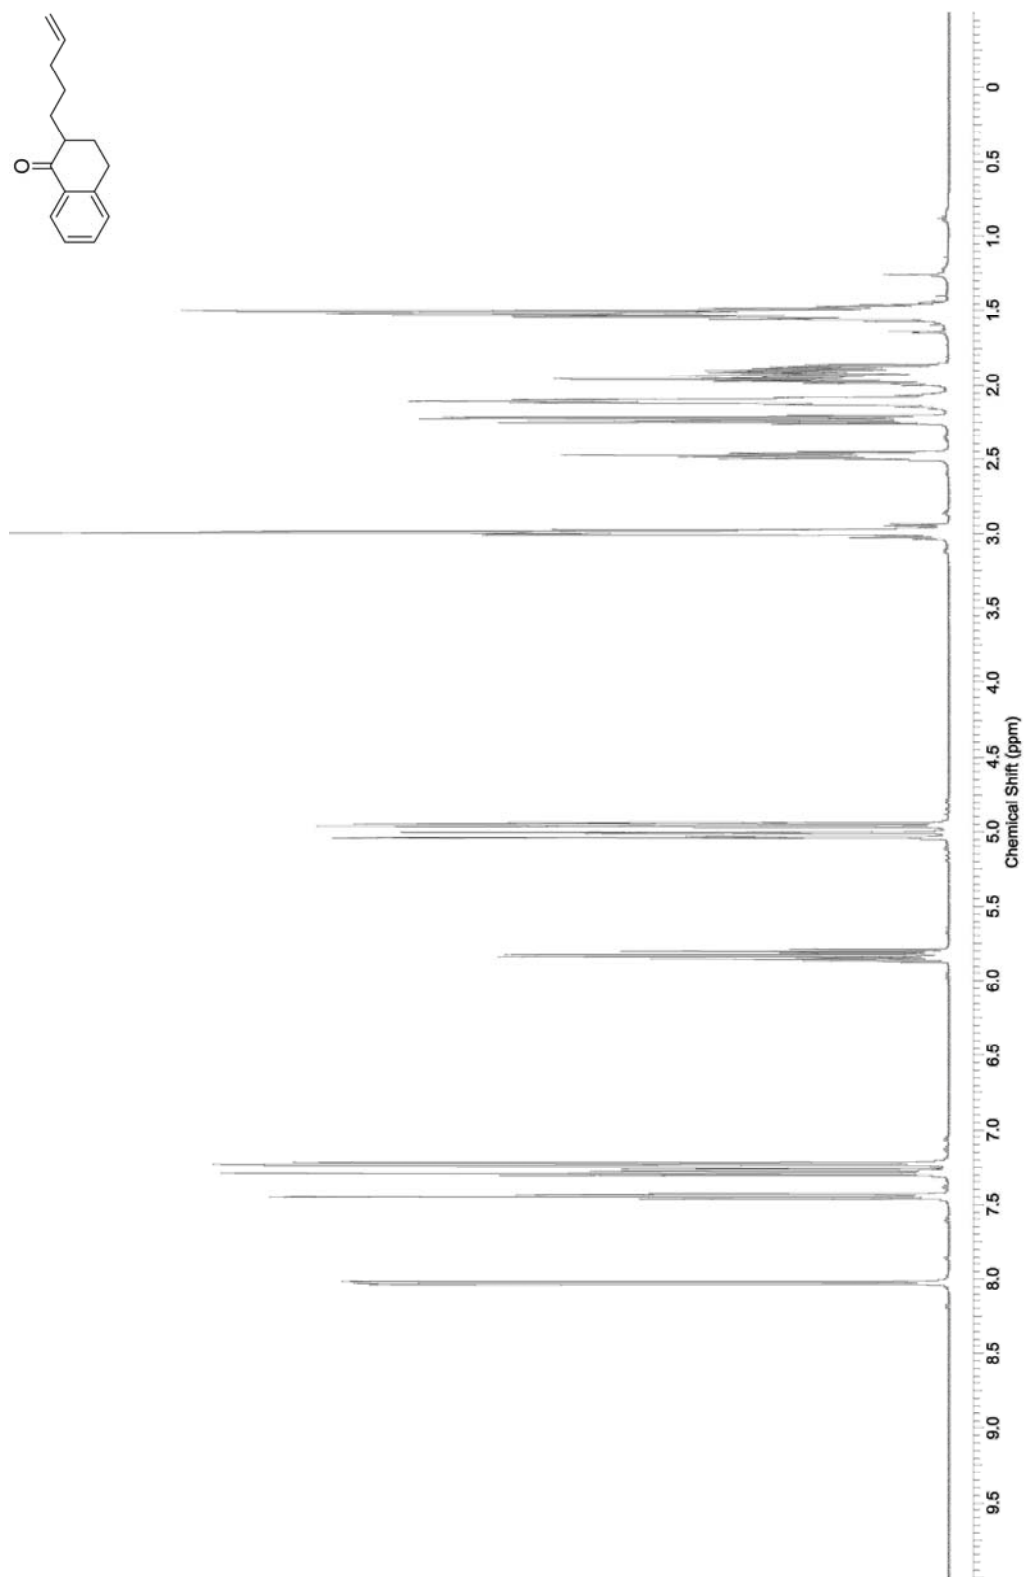

<sup>1</sup>H NMR spectrum of **S10** in CDCl<sub>3</sub> at 23 °C

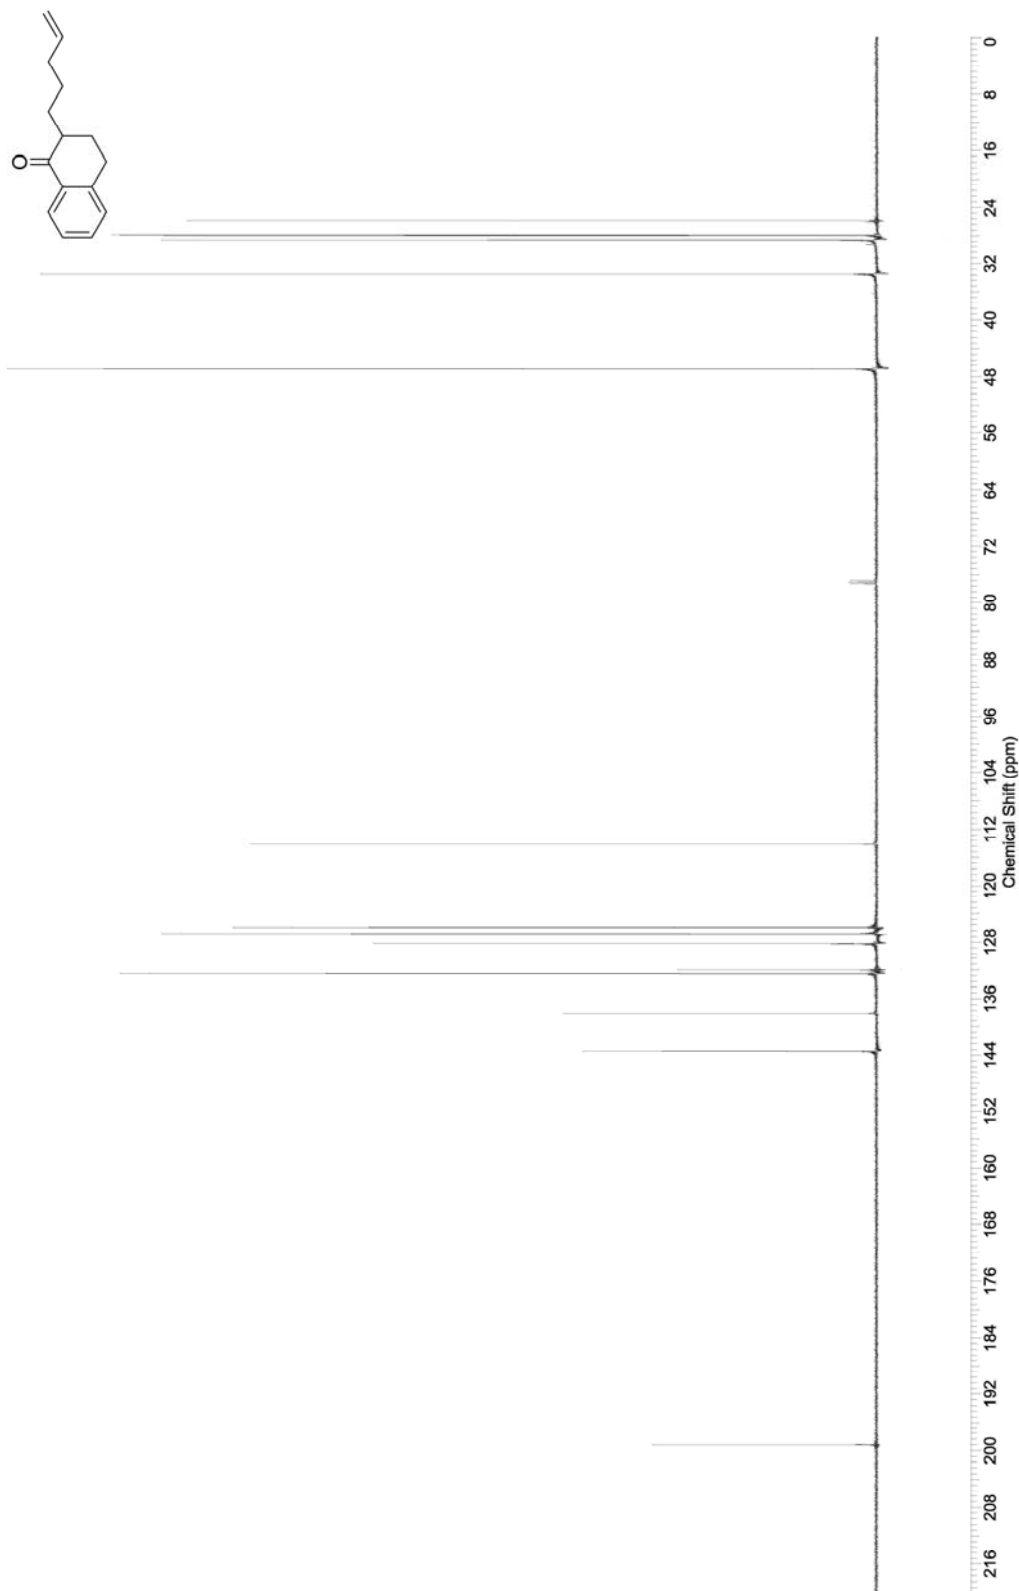

$^{13}\text{C}$  NMR spectrum of **S10** in  $\text{CDCl}_3$  at  $23\text{ }^\circ\text{C}$

**X-ray Crystallographic data of Pd<sub>2</sub>hpp<sub>4</sub>(OBz)<sub>2</sub> (24) (CCDC 784627)**

X-Ray Crystallography: A crystal mounted on a diffractometer was collected data at 100 K. The intensities of the reflections were collected by means of a Bruker APEX II CCD diffractometer (MoK $\alpha$  radiation,  $\lambda=0.71073$  Å), and equipped with an Oxford Cryosystems nitrogen flow apparatus. The collection method involved 0.5° scans in  $\omega$  at 28° in  $2\theta$ . Data integration down to 0.82 Å resolution was carried out using SAINT V7.46 A (Bruker diffractometer, 2009) with reflection spot size optimisation. Absorption corrections were made with the program SADABS (Bruker diffractometer, 2009). The structure was solved by the direct methods procedure and refined by least-squares methods again  $F^2$  using SHELXS-97 and SHELXL-97 (Sheldrick, 2008). Non-hydrogen atoms were refined anisotropically, and hydrogen atoms were allowed to ride on the respective atoms. Crystal data as well as details of data collection and refinement are summarized in Table S8, and geometric parameters are shown in Table S9. The Ortep plots produced with SHELXL-97 program, and the other drawings were produced with Accelrys DS Visualizer 2.0 (Accelrys, 2007).

**Table S8. Experimental details**

|                             |                                                                                                |
|-----------------------------|------------------------------------------------------------------------------------------------|
|                             | Pd <sub>2</sub> hpp <sub>4</sub> (OBz) <sub>2</sub>                                            |
| Crystal data                |                                                                                                |
| Chemical formula            | C <sub>46</sub> H <sub>66</sub> Cl <sub>8</sub> N <sub>12</sub> O <sub>4</sub> Pd <sub>2</sub> |
| $M_r$                       | 1347.51                                                                                        |
| Crystal system, space group | Orthorhombic, <i>Pbca</i>                                                                      |
| Temperature (K)             | 100                                                                                            |
| $a, b, c$ (Å)               | 20.6200 (17), 20.3363 (16), 25.951 (2)                                                         |
| $V$ (Å <sup>3</sup> )       | 10882.1 (15)                                                                                   |
| $Z$                         | 8                                                                                              |
| Radiation type              | Mo $K\alpha$                                                                                   |
| $\mu$ (mm <sup>-1</sup> )   | 1.11                                                                                           |
| Crystal size (mm)           | 0.40 × 0.16 × 0.10                                                                             |
| Data collection             |                                                                                                |
| Diffractometer              | CCD area detector diffractometer                                                               |
| Absorption correction       | Multi-scan<br><i>SADABS</i>                                                                    |

|                                                                            |                               |
|----------------------------------------------------------------------------|-------------------------------|
| $T_{\min}, T_{\max}$                                                       | 0.665, 0.897                  |
| No. of measured, independent and observed [ $I > 2\sigma(I)$ ] reflections | 341623, 12050, 10466          |
| $R_{\text{int}}$                                                           | 0.048                         |
| Refinement                                                                 |                               |
| $R[F^2 > 2\sigma(F^2)], wR(F^2), S$                                        | 0.022, 0.054, 1.05            |
| No. of reflections                                                         | 12050                         |
| No. of parameters                                                          | 649                           |
| No. of restraints                                                          | 0                             |
| H-atom treatment                                                           | H-atom parameters constrained |
| $\Delta\rho_{\max}, \Delta\rho_{\min}$ (e $\text{\AA}^{-3}$ )              | 0.65, -0.58                   |

Computer programs: *APEX2* v2009.3.0 (Bruker-AXS, 2009), *SAINT* 7.46A (Bruker-AXS, 2009), *SHELXS97* (Sheldrick, 2008), *SHELXL97* (Sheldrick, 2008), Bruker *SHELXTL*.

**Table S9. Selected geometric parameters ( $\text{\AA}$ ,  $^\circ$ )**

|         |             |          |           |
|---------|-------------|----------|-----------|
| Pd1—N7  | 2.0228 (14) | C16—H16B | 0.9900    |
| Pd1—N1  | 2.0376 (15) | C21—C22  | 1.515 (2) |
| Pd1—N4  | 2.0405 (15) | C21—H21A | 0.9900    |
| Pd1—N10 | 2.0522 (14) | C21—H21B | 0.9900    |
| Pd1—O1  | 2.1805 (12) | C22—C23  | 1.506 (3) |
| Pd1—Pd2 | 2.3991 (2)  | C22—H22A | 0.9900    |
| Pd2—N3  | 2.0257 (15) | C22—H22B | 0.9900    |
| Pd2—N12 | 2.0261 (14) | C23—H23A | 0.9900    |
| Pd2—N6  | 2.0373 (15) | C23—H23B | 0.9900    |
| Pd2—N9  | 2.0462 (14) | C24—C25  | 1.509 (3) |
| Pd2—O3  | 2.1854 (12) | C24—H24A | 0.9900    |
| O1—C41  | 1.281 (2)   | C24—H24B | 0.9900    |
| O2—C41  | 1.234 (2)   | C25—C26  | 1.515 (2) |
| O3—C51  | 1.277 (2)   | C25—H25A | 0.9900    |
| O4—C51  | 1.239 (2)   | C25—H25B | 0.9900    |

|         |           |          |           |
|---------|-----------|----------|-----------|
| N1—C7   | 1.329 (2) | C26—H26A | 0.9900    |
| N1—C1   | 1.457 (2) | C26—H26B | 0.9900    |
| N2—C7   | 1.369 (2) | C31—C32  | 1.517 (2) |
| N2—C3   | 1.453 (2) | C31—H31A | 0.9900    |
| N2—C4   | 1.458 (2) | C31—H31B | 0.9900    |
| N3—C7   | 1.334 (2) | C32—C33  | 1.511 (3) |
| N3—C6   | 1.452 (2) | C32—H32A | 0.9900    |
| N4—C17  | 1.332 (2) | C32—H32B | 0.9900    |
| N4—C11  | 1.458 (2) | C33—H33A | 0.9900    |
| N5—C17  | 1.371 (2) | C33—H33B | 0.9900    |
| N5—C13  | 1.459 (2) | C34—C35  | 1.505 (3) |
| N5—C14  | 1.460 (2) | C34—H34A | 0.9900    |
| N6—C17  | 1.333 (2) | C34—H34B | 0.9900    |
| N6—C16  | 1.453 (2) | C35—C36  | 1.509 (3) |
| N7—C27  | 1.335 (2) | C35—H35A | 0.9900    |
| N7—C21  | 1.467 (2) | C35—H35B | 0.9900    |
| N8—C27  | 1.364 (2) | C36—H36A | 0.9900    |
| N8—C24  | 1.457 (2) | C36—H36B | 0.9900    |
| N8—C23  | 1.460 (2) | C41—C42  | 1.518 (3) |
| N9—C27  | 1.357 (2) | C42—C43  | 1.388 (3) |
| N9—C26  | 1.460 (2) | C42—C47  | 1.390 (3) |
| N10—C37 | 1.362 (2) | C43—C44  | 1.396 (3) |
| N10—C31 | 1.464 (2) | C43—H43A | 0.9500    |
| N11—C37 | 1.366 (2) | C44—C45  | 1.375 (4) |
| N11—C33 | 1.457 (2) | C44—H44A | 0.9500    |
| N11—C34 | 1.460 (2) | C45—C46  | 1.380 (4) |
| N12—C37 | 1.333 (2) | C45—H45A | 0.9500    |
| N12—C36 | 1.466 (2) | C46—C47  | 1.386 (3) |
| C1—C2   | 1.519 (3) | C46—H46A | 0.9500    |

|          |           |          |           |
|----------|-----------|----------|-----------|
| C1—H1A   | 0.9900    | C47—H47A | 0.9500    |
| C1—H1B   | 0.9900    | C51—C52  | 1.517 (2) |
| C2—C3    | 1.511 (3) | C52—C53  | 1.392 (3) |
| C2—H2A   | 0.9900    | C52—C57  | 1.393 (3) |
| C2—H2B   | 0.9900    | C53—C54  | 1.390 (3) |
| C3—H3A   | 0.9900    | C53—H53A | 0.9500    |
| C3—H3B   | 0.9900    | C54—C55  | 1.385 (3) |
| C4—C5    | 1.510 (3) | C54—H54A | 0.9500    |
| C4—H4A   | 0.9900    | C55—C56  | 1.390 (3) |
| C4—H4B   | 0.9900    | C55—H55A | 0.9500    |
| C5—C6    | 1.520 (3) | C56—C57  | 1.389 (3) |
| C5—H5A   | 0.9900    | C56—H56A | 0.9500    |
| C5—H5B   | 0.9900    | C57—H57A | 0.9500    |
| C6—H6A   | 0.9900    | C1S—C11S | 1.763 (2) |
| C6—H6B   | 0.9900    | C1S—C12S | 1.769 (2) |
| C11—C12  | 1.520 (3) | C1S—H1SA | 0.9900    |
| C11—H11A | 0.9900    | C1S—H1SB | 0.9900    |
| C11—H11B | 0.9900    | C2S—C14S | 1.759 (3) |
| C12—C13  | 1.511 (3) | C2S—C13S | 1.766 (2) |
| C12—H12A | 0.9900    | C2S—H2SA | 0.9900    |
| C12—H12B | 0.9900    | C2S—H2SB | 0.9900    |
| C13—H13A | 0.9900    | C3S—C15S | 1.771 (2) |
| C13—H13B | 0.9900    | C3S—C16S | 1.773 (2) |
| C14—C15  | 1.515 (3) | C3S—H3SA | 0.9900    |
| C14—H14A | 0.9900    | C3S—H3SB | 0.9900    |
| C14—H14B | 0.9900    | C4S—C17S | 1.763 (2) |
| C15—C16  | 1.517 (3) | C4S—C18S | 1.772 (2) |
| C15—H15A | 0.9900    | C4S—H4SA | 0.9900    |
| C15—H15B | 0.9900    | C4S—H4SB | 0.9900    |

|             |            |               |             |
|-------------|------------|---------------|-------------|
| C16—H16A    | 0.9900     |               |             |
| N7—Pd1—N1   | 173.79 (6) | N6—C17—N5     | 119.63 (16) |
| N7—Pd1—N4   | 88.03 (6)  | N7—C21—C22    | 111.19 (15) |
| N1—Pd1—N4   | 89.74 (6)  | N7—C21—H21A   | 109.4       |
| N7—Pd1—N10  | 93.73 (6)  | C22—C21—H21A  | 109.4       |
| N1—Pd1—N10  | 87.76 (6)  | N7—C21—H21B   | 109.4       |
| N4—Pd1—N10  | 172.49 (6) | C22—C21—H21B  | 109.4       |
| N7—Pd1—O1   | 96.09 (5)  | H21A—C21—H21B | 108.0       |
| N1—Pd1—O1   | 89.74 (5)  | C23—C22—C21   | 108.12 (15) |
| N4—Pd1—O1   | 91.11 (5)  | C23—C22—H22A  | 110.1       |
| N10—Pd1—O1  | 95.96 (5)  | C21—C22—H22A  | 110.1       |
| N7—Pd1—Pd2  | 86.75 (4)  | C23—C22—H22B  | 110.1       |
| N1—Pd1—Pd2  | 87.32 (4)  | C21—C22—H22B  | 110.1       |
| N4—Pd1—Pd2  | 86.09 (4)  | H22A—C22—H22B | 108.4       |
| N10—Pd1—Pd2 | 86.72 (4)  | N8—C23—C22    | 109.82 (15) |
| O1—Pd1—Pd2  | 175.94 (3) | N8—C23—H23A   | 109.7       |
| N3—Pd2—N12  | 87.60 (6)  | C22—C23—H23A  | 109.7       |
| N3—Pd2—N6   | 89.86 (6)  | N8—C23—H23B   | 109.7       |
| N12—Pd2—N6  | 174.34 (6) | C22—C23—H23B  | 109.7       |
| N3—Pd2—N9   | 173.14 (6) | H23A—C23—H23B | 108.2       |
| N12—Pd2—N9  | 93.04 (6)  | N8—C24—C25    | 110.48 (15) |
| N6—Pd2—N9   | 88.88 (6)  | N8—C24—H24A   | 109.6       |
| N3—Pd2—O3   | 89.81 (5)  | C25—C24—H24A  | 109.6       |
| N12—Pd2—O3  | 96.78 (5)  | N8—C24—H24B   | 109.6       |
| N6—Pd2—O3   | 88.27 (5)  | C25—C24—H24B  | 109.6       |
| N9—Pd2—O3   | 96.89 (5)  | H24A—C24—H24B | 108.1       |
| N3—Pd2—Pd1  | 86.39 (4)  | C24—C25—C26   | 107.53 (15) |
| N12—Pd2—Pd1 | 87.28 (4)  | C24—C25—H25A  | 110.2       |



|            |             |               |             |
|------------|-------------|---------------|-------------|
| N6—Pd2—Pd1 | 87.51 (4)   | C26—C25—H25A  | 110.2       |
| N9—Pd2—Pd1 | 86.82 (4)   | C24—C25—H25B  | 110.2       |
| O3—Pd2—Pd1 | 174.33 (3)  | C26—C25—H25B  | 110.2       |
| C41—O1—Pd1 | 134.11 (12) | H25A—C25—H25B | 108.5       |
| C51—O3—Pd2 | 136.39 (11) | N9—C26—C25    | 109.35 (15) |
| C7—N1—C1   | 118.94 (15) | N9—C26—H26A   | 109.8       |
| C7—N1—Pd1  | 117.05 (12) | C25—C26—H26A  | 109.8       |
| C1—N1—Pd1  | 122.96 (12) | N9—C26—H26B   | 109.8       |
| C7—N2—C3   | 122.83 (16) | C25—C26—H26B  | 109.8       |
| C7—N2—C4   | 123.40 (16) | H26A—C26—H26B | 108.3       |
| C3—N2—C4   | 113.43 (15) | N7—C27—N9     | 118.43 (15) |
| C7—N3—C6   | 117.43 (15) | N7—C27—N8     | 120.45 (16) |
| C7—N3—Pd2  | 119.90 (12) | N9—C27—N8     | 121.02 (16) |
| C6—N3—Pd2  | 121.36 (12) | N10—C31—C32   | 109.23 (15) |
| C17—N4—C11 | 118.85 (15) | N10—C31—H31A  | 109.8       |
| C17—N4—Pd1 | 119.76 (12) | C32—C31—H31A  | 109.8       |
| C11—N4—Pd1 | 121.38 (11) | N10—C31—H31B  | 109.8       |
| C17—N5—C13 | 123.14 (15) | C32—C31—H31B  | 109.8       |
| C17—N5—C14 | 123.27 (15) | H31A—C31—H31B | 108.3       |
| C13—N5—C14 | 113.10 (15) | C33—C32—C31   | 107.25 (15) |
| C17—N6—C16 | 118.25 (15) | C33—C32—H32A  | 110.3       |
| C17—N6—Pd2 | 117.82 (12) | C31—C32—H32A  | 110.3       |
| C16—N6—Pd2 | 123.78 (12) | C33—C32—H32B  | 110.3       |
| C27—N7—C21 | 119.32 (15) | C31—C32—H32B  | 110.3       |
| C27—N7—Pd1 | 119.48 (12) | H32A—C32—H32B | 108.5       |
| C21—N7—Pd1 | 116.36 (11) | N11—C33—C32   | 110.75 (15) |
| C27—N8—C24 | 123.26 (15) | N11—C33—H33A  | 109.5       |
| C27—N8—C23 | 122.74 (15) | C32—C33—H33A  | 109.5       |
| C24—N8—C23 | 114.00 (15) | N11—C33—H33B  | 109.5       |

|             |             |               |             |
|-------------|-------------|---------------|-------------|
| C27—N9—C26  | 116.65 (14) | C32—C33—H33B  | 109.5       |
| C27—N9—Pd2  | 111.73 (11) | H33A—C33—H33B | 108.1       |
| C26—N9—Pd2  | 115.41 (11) | N11—C34—C35   | 110.05 (15) |
| C37—N10—C31 | 115.84 (14) | N11—C34—H34A  | 109.6       |
| C37—N10—Pd1 | 111.58 (11) | C35—C34—H34A  | 109.6       |
| C31—N10—Pd1 | 115.23 (11) | N11—C34—H34B  | 109.6       |
| C37—N11—C33 | 123.48 (15) | C35—C34—H34B  | 109.6       |
| C37—N11—C34 | 122.52 (15) | H34A—C34—H34B | 108.2       |
| C33—N11—C34 | 113.61 (15) | C34—C35—C36   | 107.71 (16) |
| C37—N12—C36 | 119.12 (15) | C34—C35—H35A  | 110.2       |
| C37—N12—Pd2 | 118.92 (12) | C36—C35—H35A  | 110.2       |
| C36—N12—Pd2 | 116.46 (11) | C34—C35—H35B  | 110.2       |
| N1—C1—C2    | 109.34 (15) | C36—C35—H35B  | 110.2       |
| N1—C1—H1A   | 109.8       | H35A—C35—H35B | 108.5       |
| C2—C1—H1A   | 109.8       | N12—C36—C35   | 112.17 (15) |
| N1—C1—H1B   | 109.8       | N12—C36—H36A  | 109.2       |
| C2—C1—H1B   | 109.8       | C35—C36—H36A  | 109.2       |
| H1A—C1—H1B  | 108.3       | N12—C36—H36B  | 109.2       |
| C3—C2—C1    | 107.89 (16) | C35—C36—H36B  | 109.2       |
| C3—C2—H2A   | 110.1       | H36A—C36—H36B | 107.9       |
| C1—C2—H2A   | 110.1       | N12—C37—N10   | 118.75 (15) |
| C3—C2—H2B   | 110.1       | N12—C37—N11   | 120.81 (16) |
| C1—C2—H2B   | 110.1       | N10—C37—N11   | 120.41 (16) |
| H2A—C2—H2B  | 108.4       | O2—C41—O1     | 127.10 (17) |
| N2—C3—C2    | 111.71 (16) | O2—C41—C42    | 118.82 (17) |
| N2—C3—H3A   | 109.3       | O1—C41—C42    | 114.09 (16) |
| C2—C3—H3A   | 109.3       | C43—C42—C47   | 119.05 (19) |
| N2—C3—H3B   | 109.3       | C43—C42—C41   | 121.63 (18) |
| C2—C3—H3B   | 109.3       | C47—C42—C41   | 119.32 (19) |

|               |             |              |             |
|---------------|-------------|--------------|-------------|
| H3A—C3—H3B    | 107.9       | C42—C43—C44  | 120.3 (2)   |
| N2—C4—C5      | 113.17 (16) | C42—C43—H43A | 119.9       |
| N2—C4—H4A     | 108.9       | C44—C43—H43A | 119.9       |
| C5—C4—H4A     | 108.9       | C45—C44—C43  | 119.9 (2)   |
| N2—C4—H4B     | 108.9       | C45—C44—H44A | 120.1       |
| C5—C4—H4B     | 108.9       | C43—C44—H44A | 120.1       |
| H4A—C4—H4B    | 107.8       | C44—C45—C46  | 120.4 (2)   |
| C4—C5—C6      | 110.39 (16) | C44—C45—H45A | 119.8       |
| C4—C5—H5A     | 109.6       | C46—C45—H45A | 119.8       |
| C6—C5—H5A     | 109.6       | C45—C46—C47  | 120.0 (2)   |
| C4—C5—H5B     | 109.6       | C45—C46—H46A | 120.0       |
| C6—C5—H5B     | 109.6       | C47—C46—H46A | 120.0       |
| H5A—C5—H5B    | 108.1       | C46—C47—C42  | 120.5 (2)   |
| N3—C6—C5      | 108.30 (16) | C46—C47—H47A | 119.8       |
| N3—C6—H6A     | 110.0       | C42—C47—H47A | 119.8       |
| C5—C6—H6A     | 110.0       | O4—C51—O3    | 127.09 (17) |
| N3—C6—H6B     | 110.0       | O4—C51—C52   | 118.74 (16) |
| C5—C6—H6B     | 110.0       | O3—C51—C52   | 114.16 (15) |
| H6A—C6—H6B    | 108.4       | C53—C52—C57  | 118.97 (17) |
| N1—C7—N3      | 120.10 (16) | C53—C52—C51  | 121.03 (16) |
| N1—C7—N2      | 120.84 (17) | C57—C52—C51  | 119.97 (17) |
| N3—C7—N2      | 119.05 (16) | C54—C53—C52  | 120.43 (18) |
| N4—C11—C12    | 108.91 (15) | C54—C53—H53A | 119.8       |
| N4—C11—H11A   | 109.9       | C52—C53—H53A | 119.8       |
| C12—C11—H11A  | 109.9       | C55—C54—C53  | 120.20 (19) |
| N4—C11—H11B   | 109.9       | C55—C54—H54A | 119.9       |
| C12—C11—H11B  | 109.9       | C53—C54—H54A | 119.9       |
| H11A—C11—H11B | 108.3       | C54—C55—C56  | 119.84 (18) |
| C13—C12—C11   | 108.51 (15) | C54—C55—H55A | 120.1       |

|               |             |               |             |
|---------------|-------------|---------------|-------------|
| C13—C12—H12A  | 110.0       | C56—C55—H55A  | 120.1       |
| C11—C12—H12A  | 110.0       | C57—C56—C55   | 119.89 (18) |
| C13—C12—H12B  | 110.0       | C57—C56—H56A  | 120.1       |
| C11—C12—H12B  | 110.0       | C55—C56—H56A  | 120.1       |
| H12A—C12—H12B | 108.4       | C56—C57—C52   | 120.66 (18) |
| N5—C13—C12    | 111.73 (15) | C56—C57—H57A  | 119.7       |
| N5—C13—H13A   | 109.3       | C52—C57—H57A  | 119.7       |
| C12—C13—H13A  | 109.3       | C11S—C1S—C12S | 111.27 (12) |
| N5—C13—H13B   | 109.3       | C11S—C1S—H1SA | 109.4       |
| C12—C13—H13B  | 109.3       | C12S—C1S—H1SA | 109.4       |
| H13A—C13—H13B | 107.9       | C11S—C1S—H1SB | 109.4       |
| N5—C14—C15    | 112.58 (15) | C12S—C1S—H1SB | 109.4       |
| N5—C14—H14A   | 109.1       | H1SA—C1S—H1SB | 108.0       |
| C15—C14—H14A  | 109.1       | C14S—C2S—C13S | 111.41 (12) |
| N5—C14—H14B   | 109.1       | C14S—C2S—H2SA | 109.3       |
| C15—C14—H14B  | 109.1       | C13S—C2S—H2SA | 109.3       |
| H14A—C14—H14B | 107.8       | C14S—C2S—H2SB | 109.3       |
| C14—C15—C16   | 108.69 (16) | C13S—C2S—H2SB | 109.3       |
| C14—C15—H15A  | 110.0       | H2SA—C2S—H2SB | 108.0       |
| C16—C15—H15A  | 110.0       | C15S—C3S—C16S | 110.25 (11) |
| C14—C15—H15B  | 110.0       | C15S—C3S—H3SA | 109.6       |
| C16—C15—H15B  | 110.0       | C16S—C3S—H3SA | 109.6       |
| H15A—C15—H15B | 108.3       | C15S—C3S—H3SB | 109.6       |
| N6—C16—C15    | 109.26 (15) | C16S—C3S—H3SB | 109.6       |
| N6—C16—H16A   | 109.8       | H3SA—C3S—H3SB | 108.1       |
| C15—C16—H16A  | 109.8       | C17S—C4S—C18S | 110.74 (11) |
| N6—C16—H16B   | 109.8       | C17S—C4S—H4SA | 109.5       |
| C15—C16—H16B  | 109.8       | C18S—C4S—H4SA | 109.5       |
| H16A—C16—H16B | 108.3       | C17S—C4S—H4SB | 109.5       |

|                 |              |                |              |
|-----------------|--------------|----------------|--------------|
| N4—C17—N6       | 119.79 (16)  | C18S—C4S—H4SB  | 109.5        |
| N4—C17—N5       | 120.56 (16)  | H4SA—C4S—H4SB  | 108.1        |
|                 |              |                |              |
| N7—Pd1—Pd2—N3   | 156.36 (6)   | C6—N3—C7—N2    | -18.9 (2)    |
| N1—Pd1—Pd2—N3   | -21.80 (6)   | Pd2—N3—C7—N2   | 173.97 (12)  |
| N4—Pd1—Pd2—N3   | 68.12 (6)    | C3—N2—C7—N1    | -7.6 (3)     |
| N10—Pd1—Pd2—N3  | -109.70 (6)  | C4—N2—C7—N1    | 165.24 (18)  |
| N7—Pd1—Pd2—N12  | -115.87 (6)  | C3—N2—C7—N3    | 172.84 (17)  |
| N1—Pd1—Pd2—N12  | 65.96 (6)    | C4—N2—C7—N3    | -14.3 (3)    |
| N4—Pd1—Pd2—N12  | 155.88 (6)   | C17—N4—C11—C12 | 45.6 (2)     |
| N10—Pd1—Pd2—N12 | -21.94 (6)   | Pd1—N4—C11—C12 | -135.10 (13) |
| N7—Pd1—Pd2—N6   | 66.35 (6)    | N4—C11—C12—C13 | -60.40 (19)  |
| N1—Pd1—Pd2—N6   | -111.82 (6)  | C17—N5—C13—C12 | -12.5 (3)    |
| N4—Pd1—Pd2—N6   | -21.90 (6)   | C14—N5—C13—C12 | 175.38 (16)  |
| N10—Pd1—Pd2—N6  | 160.28 (6)   | C11—C12—C13—N5 | 44.3 (2)     |
| N7—Pd1—Pd2—N9   | -22.67 (6)   | C17—N5—C14—C15 | 0.2 (3)      |
| N1—Pd1—Pd2—N9   | 159.17 (6)   | C13—N5—C14—C15 | 172.30 (17)  |
| N4—Pd1—Pd2—N9   | -110.92 (6)  | N5—C14—C15—C16 | 36.6 (2)     |
| N10—Pd1—Pd2—N9  | 71.26 (6)    | C17—N6—C16—C15 | 48.3 (2)     |
| N7—Pd1—O1—C41   | 36.54 (16)   | Pd2—N6—C16—C15 | -127.21 (14) |
| N1—Pd1—O1—C41   | -145.59 (16) | C14—C15—C16—N6 | -59.8 (2)    |
| N4—Pd1—O1—C41   | 124.68 (16)  | C11—N4—C17—N6  | 169.32 (16)  |
| N10—Pd1—O1—C41  | -57.87 (16)  | Pd1—N4—C17—N6  | -10.0 (2)    |
| N3—Pd2—O3—C51   | 119.33 (17)  | C11—N4—C17—N5  | -12.2 (3)    |
| N12—Pd2—O3—C51  | 31.78 (17)   | Pd1—N4—C17—N5  | 168.42 (13)  |
| N6—Pd2—O3—C51   | -150.80 (17) | C16—N6—C17—N4  | 168.30 (16)  |
| N9—Pd2—O3—C51   | -62.14 (17)  | Pd2—N6—C17—N4  | -16.0 (2)    |
| N4—Pd1—N1—C7    | -57.20 (14)  | C16—N6—C17—N5  | -10.2 (2)    |
| N10—Pd1—N1—C7   | 115.71 (14)  | Pd2—N6—C17—N5  | 165.58 (13)  |

|                |              |                 |              |
|----------------|--------------|-----------------|--------------|
| O1—Pd1—N1—C7   | -148.31 (13) | C13—N5—C17—N4   | -5.6 (3)     |
| Pd2—Pd1—N1—C7  | 28.89 (13)   | C14—N5—C17—N4   | 165.77 (17)  |
| N4—Pd1—N1—C1   | 110.92 (14)  | C13—N5—C17—N6   | 172.88 (17)  |
| N10—Pd1—N1—C1  | -76.16 (14)  | C14—N5—C17—N6   | -15.8 (3)    |
| O1—Pd1—N1—C1   | 19.82 (14)   | C27—N7—C21—C22  | -27.0 (2)    |
| Pd2—Pd1—N1—C1  | -162.98 (14) | Pd1—N7—C21—C22  | 128.23 (13)  |
| N12—Pd2—N3—C7  | -65.53 (14)  | N7—C21—C22—C23  | 57.5 (2)     |
| N6—Pd2—N3—C7   | 109.41 (14)  | C27—N8—C23—C22  | 16.4 (2)     |
| O3—Pd2—N3—C7   | -162.33 (14) | C24—N8—C23—C22  | -163.51 (16) |
| Pd1—Pd2—N3—C7  | 21.89 (13)   | C21—C22—C23—N8  | -51.2 (2)    |
| N12—Pd2—N3—C6  | 127.82 (14)  | C27—N8—C24—C25  | 10.6 (2)     |
| N6—Pd2—N3—C6   | -57.24 (14)  | C23—N8—C24—C25  | -169.51 (16) |
| O3—Pd2—N3—C6   | 31.02 (14)   | N8—C24—C25—C26  | -47.2 (2)    |
| Pd1—Pd2—N3—C6  | -144.76 (13) | C27—N9—C26—C25  | -43.4 (2)    |
| N7—Pd1—N4—C17  | -62.63 (14)  | Pd2—N9—C26—C25  | -177.54 (11) |
| N1—Pd1—N4—C17  | 111.57 (14)  | C24—C25—C26—N9  | 64.32 (19)   |
| O1—Pd1—N4—C17  | -158.69 (14) | C21—N7—C27—N9   | 172.86 (15)  |
| Pd2—Pd1—N4—C17 | 24.24 (13)   | Pd1—N7—C27—N9   | 18.4 (2)     |
| N7—Pd1—N4—C11  | 118.03 (14)  | C21—N7—C27—N8   | -10.7 (2)    |
| N1—Pd1—N4—C11  | -67.76 (14)  | Pd1—N7—C27—N8   | -165.20 (12) |
| O1—Pd1—N4—C11  | 21.97 (14)   | C26—N9—C27—N7   | -178.90 (15) |
| Pd2—Pd1—N4—C11 | -155.10 (13) | Pd2—N9—C27—N7   | -43.11 (19)  |
| N3—Pd2—N6—C17  | -59.24 (13)  | C26—N9—C27—N8   | 4.7 (2)      |
| N9—Pd2—N6—C17  | 114.02 (13)  | Pd2—N9—C27—N8   | 140.49 (14)  |
| O3—Pd2—N6—C17  | -149.05 (13) | C24—N8—C27—N7   | -163.37 (16) |
| Pd1—Pd2—N6—C17 | 27.16 (13)   | C23—N8—C27—N7   | 16.7 (3)     |
| N3—Pd2—N6—C16  | 116.26 (14)  | C24—N8—C27—N9   | 13.0 (3)     |
| N9—Pd2—N6—C16  | -70.48 (14)  | C23—N8—C27—N9   | -166.94 (17) |
| O3—Pd2—N6—C16  | 26.45 (14)   | C37—N10—C31—C32 | -45.3 (2)    |

|                 |              |                 |              |
|-----------------|--------------|-----------------|--------------|
| Pd1—Pd2—N6—C16  | -157.34 (14) | Pd1—N10—C31—C32 | -178.11 (11) |
| N4—Pd1—N7—C27   | 96.73 (13)   | N10—C31—C32—C33 | 65.42 (19)   |
| N10—Pd1—N7—C27  | -75.95 (13)  | C37—N11—C33—C32 | 4.6 (3)      |
| O1—Pd1—N7—C27   | -172.36 (13) | C34—N11—C33—C32 | -168.28 (16) |
| Pd2—Pd1—N7—C27  | 10.55 (12)   | C31—C32—C33—N11 | -44.4 (2)    |
| N4—Pd1—N7—C21   | -58.49 (12)  | C37—N11—C34—C35 | 19.8 (3)     |
| N10—Pd1—N7—C21  | 128.83 (12)  | C33—N11—C34—C35 | -167.19 (16) |
| O1—Pd1—N7—C21   | 32.42 (12)   | N11—C34—C35—C36 | -52.0 (2)    |
| Pd2—Pd1—N7—C21  | -144.67 (12) | C37—N12—C36—C35 | -26.8 (2)    |
| N12—Pd2—N9—C27  | 127.08 (12)  | Pd2—N12—C36—C35 | 126.79 (14)  |
| N6—Pd2—N9—C27   | -47.59 (12)  | C34—C35—C36—N12 | 56.7 (2)     |
| O3—Pd2—N9—C27   | -135.71 (12) | C36—N12—C37—N10 | 173.06 (15)  |
| Pd1—Pd2—N9—C27  | 39.98 (11)   | Pd2—N12—C37—N10 | 20.1 (2)     |
| N12—Pd2—N9—C26  | -96.54 (12)  | C36—N12—C37—N11 | -8.9 (2)     |
| N6—Pd2—N9—C26   | 88.78 (12)   | Pd2—N12—C37—N11 | -161.88 (13) |
| O3—Pd2—N9—C26   | 0.67 (12)    | C31—N10—C37—N12 | -178.43 (15) |
| Pd1—Pd2—N9—C26  | 176.36 (12)  | Pd1—N10—C37—N12 | -43.94 (19)  |
| N7—Pd1—N10—C37  | 126.04 (12)  | C31—N10—C37—N11 | 3.6 (2)      |
| N1—Pd1—N10—C37  | -47.93 (12)  | Pd1—N10—C37—N11 | 138.04 (14)  |
| O1—Pd1—N10—C37  | -137.43 (12) | C33—N11—C37—N12 | -159.55 (17) |
| Pd2—Pd1—N10—C37 | 39.52 (11)   | C34—N11—C37—N12 | 12.7 (3)     |
| N7—Pd1—N10—C31  | -99.18 (12)  | C33—N11—C37—N10 | 18.4 (3)     |
| N1—Pd1—N10—C31  | 86.86 (12)   | C34—N11—C37—N10 | -169.28 (17) |
| O1—Pd1—N10—C31  | -2.65 (12)   | Pd1—O1—C41—O2   | -4.5 (3)     |
| Pd2—Pd1—N10—C31 | 174.30 (12)  | Pd1—O1—C41—C42  | 175.05 (11)  |
| N3—Pd2—N12—C37  | 95.58 (13)   | O2—C41—C42—C43  | 173.84 (18)  |
| N9—Pd2—N12—C37  | -77.58 (13)  | O1—C41—C42—C43  | -5.8 (3)     |
| O3—Pd2—N12—C37  | -174.90 (13) | O2—C41—C42—C47  | -6.9 (3)     |
| Pd1—Pd2—N12—C37 | 9.08 (12)    | O1—C41—C42—C47  | 173.44 (17)  |

|                 |              |                 |              |
|-----------------|--------------|-----------------|--------------|
| N3—Pd2—N12—C36  | -58.07 (12)  | C47—C42—C43—C44 | 1.3 (3)      |
| N9—Pd2—N12—C36  | 128.77 (12)  | C41—C42—C43—C44 | -179.51 (18) |
| O3—Pd2—N12—C36  | 31.45 (13)   | C42—C43—C44—C45 | -0.7 (3)     |
| Pd1—Pd2—N12—C36 | -144.57 (12) | C43—C44—C45—C46 | -0.2 (3)     |
| C7—N1—C1—C2     | 42.9 (2)     | C44—C45—C46—C47 | 0.6 (4)      |
| Pd1—N1—C1—C2    | -125.05 (14) | C45—C46—C47—C42 | -0.1 (3)     |
| N1—C1—C2—C3     | -60.5 (2)    | C43—C42—C47—C46 | -0.9 (3)     |
| C7—N2—C3—C2     | -13.4 (3)    | C41—C42—C47—C46 | 179.90 (19)  |
| C4—N2—C3—C2     | 173.06 (17)  | Pd2—O3—C51—O4   | 1.0 (3)      |
| C1—C2—C3—N2     | 46.0 (2)     | Pd2—O3—C51—C52  | -178.55 (11) |
| C7—N2—C4—C5     | 7.6 (3)      | O4—C51—C52—C53  | 173.52 (17)  |
| C3—N2—C4—C5     | -178.90 (18) | O3—C51—C52—C53  | -6.9 (2)     |
| N2—C4—C5—C6     | 28.2 (2)     | O4—C51—C52—C57  | -8.3 (3)     |
| C7—N3—C6—C5     | 54.4 (2)     | O3—C51—C52—C57  | 171.35 (16)  |
| Pd2—N3—C6—C5    | -138.64 (13) | C57—C52—C53—C54 | 0.2 (3)      |
| C4—C5—C6—N3     | -57.1 (2)    | C51—C52—C53—C54 | 178.48 (17)  |
| C1—N1—C7—N3     | 171.28 (16)  | C52—C53—C54—C55 | -0.7 (3)     |
| Pd1—N1—C7—N3    | -20.1 (2)    | C53—C54—C55—C56 | 0.6 (3)      |
| C1—N1—C7—N2     | -8.2 (3)     | C54—C55—C56—C57 | 0.0 (3)      |
| Pd1—N1—C7—N2    | 160.38 (13)  | C55—C56—C57—C52 | -0.4 (3)     |
| C6—N3—C7—N1     | 161.60 (16)  | C53—C52—C57—C56 | 0.3 (3)      |
| Pd2—N3—C7—N1    | -5.6 (2)     | C51—C52—C57—C56 | -177.97 (17) |



**Figure S10. X-ray structure of 24**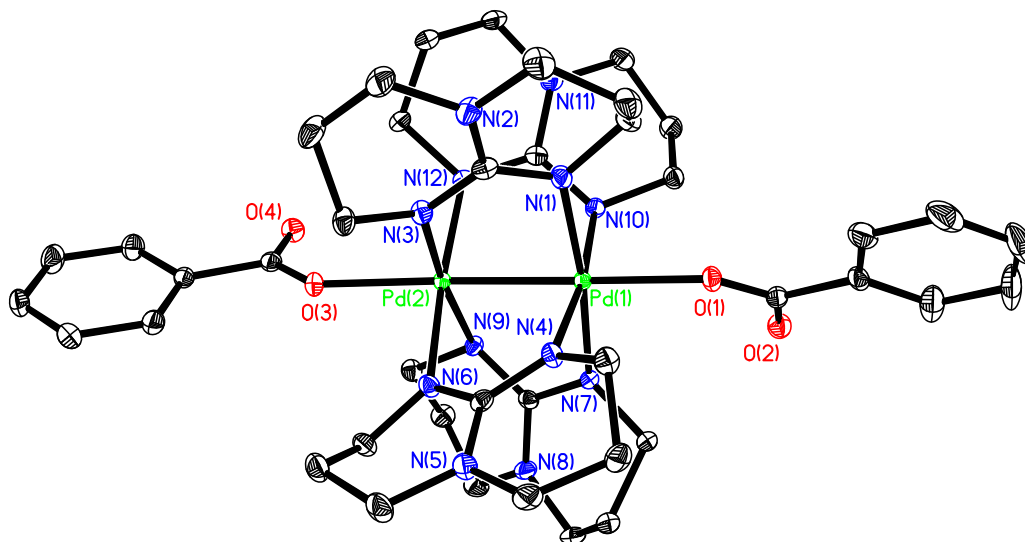

The x-ray structure of **24** with hydrogens and the atomic labeling scheme. The nonhydrogen atoms are depicted with 50% probability ellipsoids.
